## 1 **SnapATAC: A Comprehensive Analysis Package for Single Cell ATAC-seq**

2

3 Rongxin Fang<sup>1,2</sup>, Sebastian Preissl<sup>3</sup>, Yang Li<sup>2</sup>, Xiaomeng Hou<sup>3</sup>, Jacinta Lucero<sup>4</sup>, Xinxin  
4 Wang<sup>3</sup>, Amir Motamedi<sup>5</sup>, Andrew K. Shiau<sup>5</sup>, Xinzhu Zhou<sup>6</sup>, Fangming Xie<sup>7</sup>, Eran A.  
5 Mukamel<sup>7</sup>, Kai Zhang<sup>2</sup>, Yanxiao Zhang<sup>2</sup>, M. Margarita Behrens<sup>4</sup>, Joseph R. Ecker<sup>4,8</sup>, and  
6 Bing Ren<sup>2,3,9\*</sup>

7

8 1. Bioinformatics and Systems Biology Graduate Program, University of California San  
9 Diego, La Jolla, CA 92093, USA

10 2. Ludwig Institute for Cancer Research, La Jolla, CA 92093, USA

11 3. Center for Epigenomics, Department of Cellular and Molecular Medicine, University  
12 of California, San Diego, La Jolla, CA 92093, USA

13 4. The Salk Institute for Biological Studies, La Jolla, CA 92037, USA

14 5. Small Molecule Discovery Program, Ludwig Institute for Cancer Research, La Jolla,  
15 CA 92093, USA

16 6. Biomedical Science Graduate Program, University of California San Diego, La Jolla,  
17 CA 92093, USA

18 7. Department of Cognitive Science, University of California, San Diego, La Jolla, CA  
19 92037, USA

20 8. Howard Hughes Medical Institute, The Salk Institute for Biological Studies, La Jolla,  
21 CA 92037, USA

22 9. Department of Cellular and Molecular Medicine, Institute of Genomic Medicine,  
23 UCSD Moores Cancer Center, La Jolla, CA 92093, USA

24

25 \*Correspondence to: [biren@ucsd.edu](mailto:biren@ucsd.edu)

26

27 **Abstract**

28 Identification of the *cis*-regulatory elements controlling cell-type specific gene expression  
29 patterns is essential for understanding the origin of cellular diversity. Conventional assays  
30 to map regulatory elements via open chromatin analysis of primary tissues is hindered by  
31 heterogeneity of the samples. Single cell analysis of transposase-accessible chromatin  
32 (scATAC-seq) can overcome this limitation. However, the high-level noise of each single  
33 cell profile and the large volumes of data could pose unique computational challenges.  
34 Here, we introduce SnapATAC, a software package for analyzing scATAC-seq datasets.  
35 **SnapATAC can efficiently dissect cellular heterogeneity in an unbiased manner and map**  
36 **the trajectories of cellular states.** Using the Nyström method, a sampling technique that  
37 generates the low rank embedding for large-scale dataset, SnapATAC can process data  
38 from **up to** a million cells. **Furthermore, SnapATAC incorporates existing tools into a**  
39 **comprehensive package for analyzing single cell ATAC-seq dataset.** As demonstration of  
40 its utility, SnapATAC was applied to 55,592 single-nucleus ATAC-seq profiles from the  
41 mouse secondary motor cortex. **The analysis revealed ~370,000 candidate regulatory**  
42 **elements in 31 distinct cell populations in this brain region** and inferred candidate  
43 transcriptional regulators in each of the cell types.

44

## 45 **Introduction**

46 **A multicellular organism** comprises **diverse** cell types, **each** highly specialized to carry out  
47 **unique** functions. **Each cell lineage** is established during development **as a result of tightly**  
48 **regulated spatiotemporal** gene expression programs<sup>1</sup>, which are driven in part by  
49 sequence-specific transcription factors that interact with *cis*-regulatory sequences in a  
50 cell-type specific manner<sup>2</sup>. Thus, identifying the *cis*-elements and their cellular specificity  
51 is an essential step towards understanding the **developmental** programs encoded in the  
52 linear genome sequence.

53

54 Since the *cis*-regulatory elements are often marked by hypersensitivity to nucleases or  
55 transposases when they are active or poised to act, approaches to detect chromatin  
56 accessibility, such as ATAC-seq (Assay for Transposase-Accessible Chromatin  
57 using sequencing)<sup>3</sup> and DNase-seq (DNase I hypersensitive sites sequencing)<sup>4</sup> have been  
58 widely used to map candidate *cis*-regulatory sequences. However, conventional assays  
59 that use bulk tissue samples as input cannot resolve cell-type specific usage of *cis* elements  
60 and lacks the resolution to study their temporal dynamics. To overcome these limitations,  
61 a number of methods have been developed for measuring chromatin accessibility in  
62 single cells. One approach involves combinatorial indexing to simultaneously analyze  
63 tens of thousands of cells<sup>5</sup>. This strategy has been successfully applied to embryonic  
64 tissues in *D. melanogaster*<sup>6</sup>, developing mouse forebrains<sup>7</sup> and adult mouse tissues<sup>8</sup>. A  
65 related method, scTHS-seq (single-cell transposome hypersensitive site sequencing),  
66 has also been used to study chromatin landscapes at single cell resolution in the adult  
67 human brains<sup>9</sup>. A third approach relies on isolation of cell using microfluidic devices  
68 (Fluidigm, C1)<sup>10</sup> or within individually indexable wells of a nano-well array (Takara Bio,  
69 ICCELL8)<sup>11</sup>. More recently, single cell ATAC-seq analysis has been demonstrated on  
70 droplet-based platforms<sup>12,13</sup>, enabling profiling of chromatin accessibility from  
71 hundreds of thousands cells in a single experiment<sup>13</sup>. Hereafter, these methods are  
72 referred to collectively as single cell ATAC-seq (scATAC-seq).

73

74 The growing volume of scATAC-seq datasets **coupled with** the sparsity of signals in each  
75 individual profile due to low detection efficiency (5-15% of peaks detected per cell)<sup>7</sup>  
76 present a unique computational challenge. To address this challenge, a number of

77 unsupervised algorithms have been developed. One approach, chromVAR<sup>14</sup>, groups  
78 similar cells together by dissecting the variability of transcription factor (TF) motif  
79 occurrence in the open chromatin regions in each cell. Another approach employs the  
80 natural language processing techniques such as Latent Semantic Analysis (LSA)<sup>8</sup> and  
81 Latent Dirichlet Allocation (LDA)<sup>15</sup> to group cells together based on the similarity of  
82 chromatin accessibility. A third approach analyzes the variability of chromatin  
83 accessibility in cells based on the k-mer composition of the sequencing reads from each  
84 cell<sup>13,16</sup>. A fourth approach, Cicero<sup>17</sup>, infers cell-to-cell similarities based on the gene  
85 activity scores predicted from their putative regulatory elements in each cell.

86

87 Because the current methods often require performing linear dimensionality reduction  
88 such as **singular value decomposition (SVD)** on a cell matrix of hundreds of thousands of  
89 dimensions, scaling the analysis to millions of cells remains very challenging or nearly  
90 impossible. In addition, the unsupervised identification of cell types or states in complex  
91 tissues using scATAC-seq dataset does not **have the same degree of sensitivity as that from**  
92 **scRNA-seq**<sup>18</sup>. One possibility is that the current methods rely on the use of pre-defined  
93 accessibility peaks based on the aggregate signals. There are several limitations to this  
94 choice. **First, the cell type identification could be biased toward the most abundant cell**  
95 **types in the tissues, and consequently lack the ability to reveal regulatory elements in the**  
96 **rare cell populations that could be underrepresented in the aggregate dataset. Second, a**  
97 **sufficient number of single cell profiles would be required to create robust aggregate**  
98 **signal for creating the peak reference.**

99

100 To overcome these limitations, we introduce a software package, Single Nucleus Analysis  
101 Pipeline for ATAC-seq – SnapATAC (<https://github.com/r3fang/SnapATAC>) - that does  
102 not require population-level peak annotation prior to clustering. **Instead, it resolves**  
103 **cellular heterogeneity by directly comparing the similarity in genome-wide accessibility**  
104 **profiles between cells. We also adopt a new** sampling technique, ensemble Nyström  
105 method<sup>19,20</sup>, **that significantly** improves the computational efficiency and enables the  
106 analysis of scATAC-seq from a million cells on **typical** hardware. **SnapATAC also**  
107 **incorporates many existing tools, including integration of scATAC-seq and scRNA-seq**  
108 **dataset**<sup>18</sup>, **prediction of enhancer-promoter interaction, discovery of key transcription**

109 factors<sup>21</sup>, identification of differentially accessible elements<sup>22</sup>, construction of trajectories  
110 during cellular differentiation, correction of batch effect<sup>23</sup> and classification of new  
111 dataset based on existing cell atlas<sup>18</sup>, into one single package to maximize its utility and  
112 functionalities. Thus, SnapATAC represents a comprehensive solution for scATAC-seq  
113 analysis.

114

115 Through extensive benchmarking using both simulated and empirical datasets from  
116 diverse tissues and species, we show that SnapATAC outperforms current methods in  
117 accuracy, sensitivity, scalability and reproducibility for cell type identification from  
118 complex tissues. Furthermore, we demonstrate the utility of SnapATAC by building a  
119 high-resolution single cell atlas of the mouse secondary motor cortex. This atlas  
120 comprises of ~370,000 candidate *cis*-regulatory elements across 31 distinct cell types,  
121 including rare neuronal cell types that account for less than 0.1% of the total population  
122 analyzed. Through motif enrichment analysis, we further infer potential key  
123 transcriptional regulators that control cell type specific gene expression programs in the  
124 mouse brain.

125

## 126 Results

### 127 Overview of SnapATAC workflow

128 A schematic overview of SnapATAC workflow is displayed in **Fig. 1**. SnapATAC first  
129 performs pre-processing of sequencing reads including demultiplexing, reads alignments  
130 and filtering, duplicate removal and barcode selection using SnapTools  
131 (<https://github.com/r3fang/SnapTools>) (**Supplementary Methods**). The output of  
132 this pre-processing step is a “snap” (Single-Nucleus Accessibility Profiles) file  
133 (**Supplementary Note 1**) specially formatted for storing single cell ATAC-seq datasets  
134 (**Supplementary Fig. 1a**). Users could select high quality single cell ATAC-seq profiles  
135 for subsequent analysis based on numbers of unique fragments detected from the cell and  
136 percentage of promoter-overlapping fragments<sup>24</sup>.

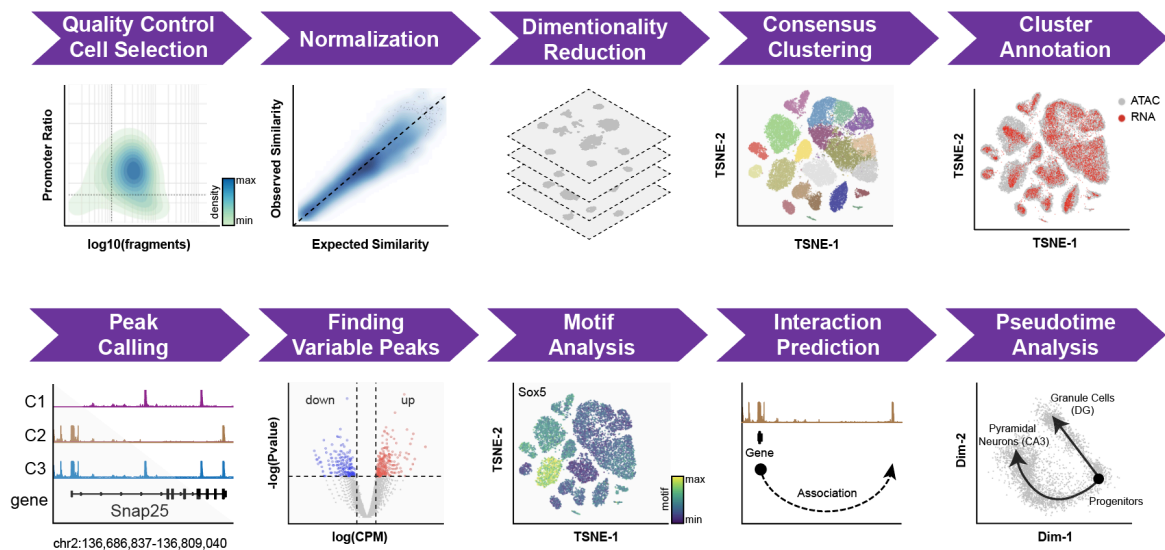

137

138 **Figure 1. Schematic overview of SnapATAC analysis workflow.** See main text  
139 for description of each step.

140

141 Next, SnapATAC resolves the heterogeneity of cell population by assessing the similarity  
142 of chromatin accessibility between cells. To achieve this goal, each single cell chromatin  
143 accessibility profile is represented as a binary vector, the length of which corresponds to  
144 the number of uniform-sized bins that segment the genome. **Through systematic**  
145 **benchmarking, a bin size of 5kb is chosen in this study (Supplementary Methods and**  
146 **Supplementary Fig. 2b).** A bin with value “1” indicates that one or more reads fall  
147 within that bin, and the value “0” indicates otherwise. The set of binary vectors from all

148 the cells are converted into a Jaccard similarity matrix, with the value of each element  
149 calculated from the fraction of overlapping bins between every pair of cells. Because the  
150 value of Jaccard Index could be influenced by sequencing depth of a cell  
151 (**Supplementary Methods**), a regression-based normalization method is developed to  
152 remove this confounding factor (**Supplementary Methods** and **Supplementary Fig.**  
153 **3-4**). Using the normalized similarity matrix, eigenvector decomposition is performed for  
154 dimensionality reduction. Finally, in the reduced dimension, SnapATAC uses Harmony<sup>23</sup>  
155 to remove potential batch effect between samples introduced by technical variability  
156 (**Supplementary Methods**).

157  
158 The computational cost of the algorithm scales **quadratically** with the number of cells. To  
159 improve the scalability of SnapATAC, a sampling technique - the Nyström method<sup>19</sup> – is  
160 used to efficiently generate the low-rank embedding for large-scale datasets  
161 (**Supplementary Methods**). Nyström method contains two major steps: 1) it computes  
162 the **low dimension** embedding for a subset of selected cells (also known as landmarks); 2)  
163 it projects the remaining cells to the embedding structure learned from the landmarks.  
164 This achieves significant speedup considering that the number of landmarks could be  
165 substantially smaller than the total number of cells. Through benchmarking, we further  
166 demonstrate that this approach will not sacrifice the performance once the landmarks are  
167 chosen appropriately (**Supplementary Methods** and **Supplementary Fig. 5a-c**) as  
168 reported before<sup>20</sup>.

169  
170 Nyström method is stochastic and could yield different clustering results in each sampling.  
171 To overcome this limitation, a consensus approach is used that combines a mixture of  
172 low-dimensional manifolds learned from different sets of sampling (**Supplementary**  
173 **Methods**). **Through benchmarking, we demonstrate that the ensemble approach can**  
174 **significantly improve the reproducibility of clustering outcome compared to the standard**  
175 **Nyström method (Supplementary Fig. 5d)**. In addition, this consensus algorithm  
176 naturally fits within the distributed computing environments where their computational  
177 costs are roughly the same as that of the standard single sampling method.

178

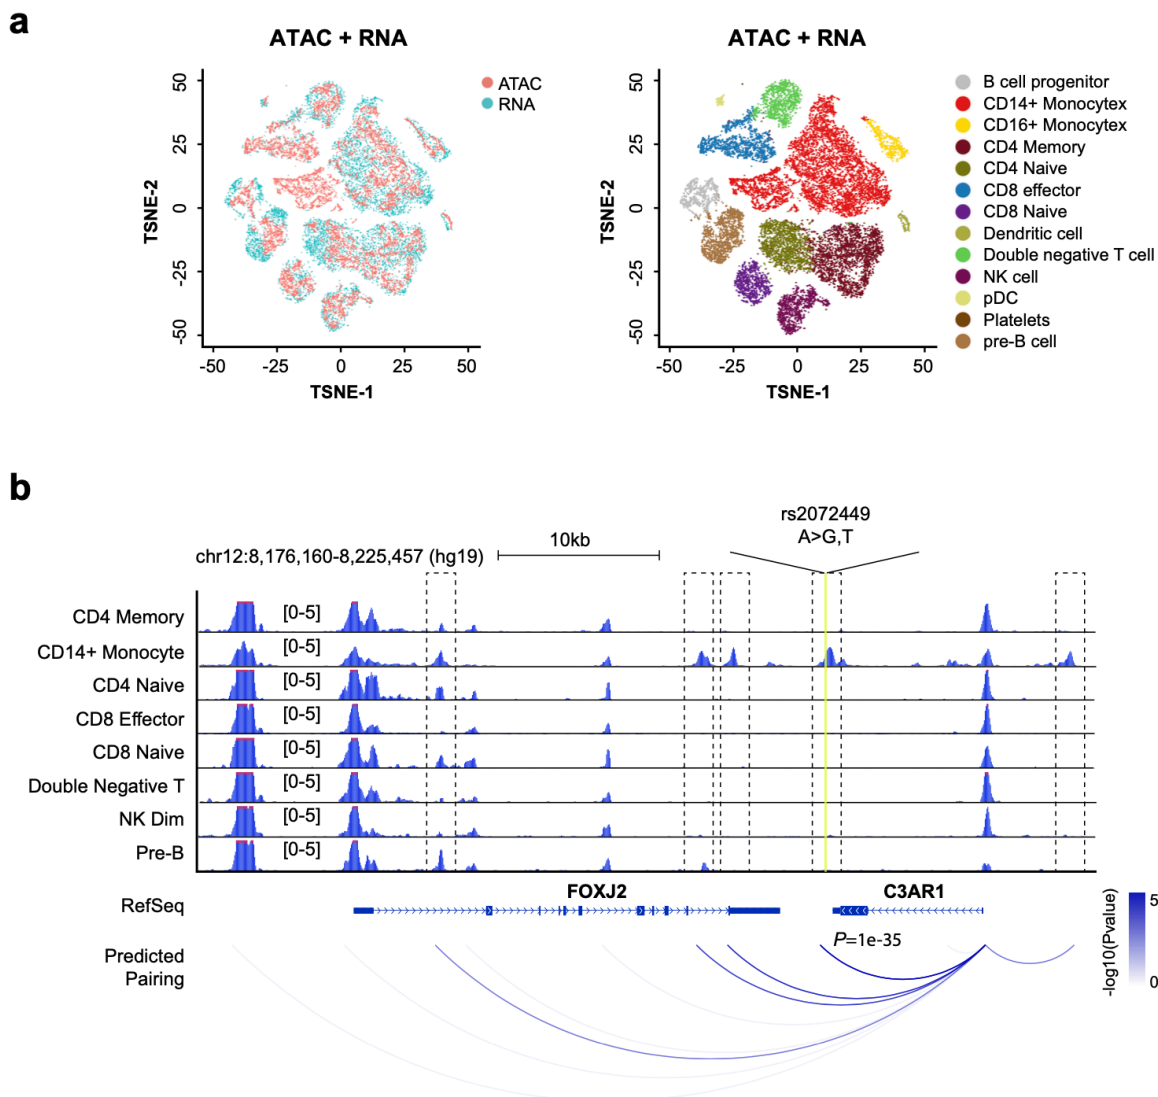

179

180 **Figure 2. SnapATAC integrates single cell ATAC-seq and RNA-seq data to link**  
181 **enhancers to putative target genes.** (a) Joint t-SNE visualization of scATAC-seq and  
182 scRNA-seq datasets from peripheral blood mononuclear cells (PBMC). Cells are colored  
183 by modality (left) and predicted cell types (right). (b) Cell-type specific chromatin  
184 landscapes are shown together with the association score between gene expression of  
185 C3AR1 and accessibility at its putative enhancers. Dash lines highlight the significant  
186 enhancer-promoter pairs. Yellow line represents the SNP (rs2072449) that is associated  
187 with C3AR1 expression<sup>25</sup>.

188

189 As a standalone software package, SnapATAC also provides a number of commonly used  
190 functions for scATAC-seq analysis by incorporating many existing useful tools, as  
191 described below:



192

193 First, to facilitate the annotation of resulting cell clusters, SnapATAC provides three  
194 different approaches: i) SnapATAC annotates the clusters based on the accessibility score  
195 at the canonical marker genes (**Supplementary Methods**); ii) it infers cell type labels  
196 by integrating with corresponding single cell RNA-seq datasets<sup>18</sup> (**Supplementary**  
197 **Methods** and **Fig. 2a**); iii) it allows supervised annotation of new single cell ATAC-seq  
198 dataset based on an existing cell atlas (**Supplementary Methods**).

199

200 Second, SnapATAC allows identification of the candidate regulatory elements in each  
201 cluster by applying various peak-calling algorithms<sup>26</sup> to the aggregate chromatin profiles.  
202 Differential analysis is then performed to identify cell-type specific regulatory elements<sup>22</sup>.  
203 Candidate master transcription factors in each cell cluster are discovered through motif  
204 enrichment analysis of the differentially accessible regions in each cluster<sup>27</sup>. SnapATAC  
205 further conducts Genomic Regions Enrichment of Annotation Tool (GREAT)<sup>28</sup> analysis  
206 to identify the biological pathways active in each cell type.

207

208 Third, SnapATAC incorporates a new approach to link candidate regulatory elements to  
209 their putative target genes. In contrast to previous method<sup>17</sup> that relies on analysis of co-  
210 accessibility of **putative enhancers** and promoters<sup>29</sup>, SnapATAC infers the linkage based  
211 on the association between gene expression and chromatin accessibility in single cells  
212 where scRNA-seq data is available (**Supplementary Methods**). **First, SnapATAC**  
213 **integrates scATAC-seq and scRNA-seq using Canonical Correlation Analysis (CCA) as**  
214 **described in the previous study<sup>30</sup>.** Second, for each scATAC-seq profile, a corresponding  
215 gene expression profile is imputed based on the weighted average of its  $k$ -nearest  
216 neighboring cells (*i.e.*  $k=15$ ) in the scRNA-seq dataset. A “pseudo” cell is created that  
217 contains the information of both chromatin accessibility and gene expression. Finally,  
218 logistic regression is performed to quantify the association between the gene expression  
219 and binarized accessibility state at **putative enhancers** (**Supplementary Methods**).  
220 This new approach is used to integrate ~15K peripheral blood mononuclear cells (PBMC)  
221 chromatin profiles and ~10K PBMC transcriptomic profiles (**Fig. 2a**) and represent them  
222 in a joint t-SNE embedding space (**Fig. 2a**). Over 98% of the single cell ATAC-seq cells  
223 can be confidently assigned to a cell type defined in the scRNA-seq dataset

224 **(Supplementary Fig. 6a)**. Enhancer-gene pairs are predicted for 3,000 genes  
225 differentially expressed between cell types in PBMC as determined by scRNA-seq using  
226 Seurat<sup>18</sup>. The validity of the prediction is supported by two lines of evidence. First, the  
227 association score exhibits a distance decay from the TSS, consistent with the distance  
228 decay of interaction frequency observed in chromatin conformation study<sup>31</sup>  
229 **(Supplementary Fig. 6b)**. Second, the predictions match well with the expression  
230 quantitative trait loci (*cis*-eQTLs) derived from interferon- $\gamma$  and lipopolysaccharide  
231 stimulation of monocytes<sup>25</sup> with reasonable prediction power (AUROC=0.66,  
232 AUPRC=0.68; **Supplementary Fig. 6c-d** and **Supplementary Methods**). It is  
233 important to note that while statistical association between scATAC-seq and scRNA-seq  
234 provides another approach to symmetrically link enhancers to their putative target genes,  
235 the predictions require further experimental validation.  
236

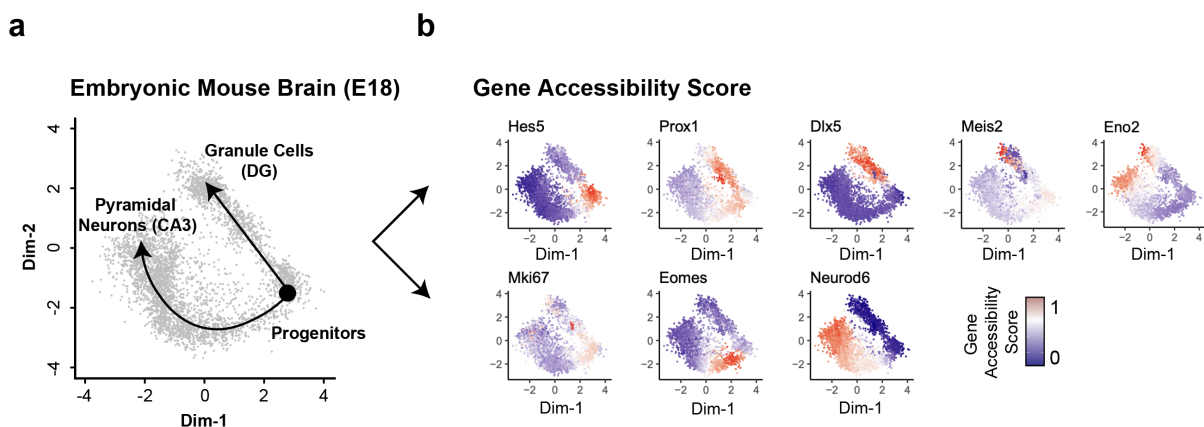

237  
238  
239 **Figure 3. SnapATAC constructs cellular trajectories for the developing**  
240 **mouse brain.** (a) Two-dimensional visualization of a dataset that contains 4,259 single  
241 cell chromatin profiles from the hippocampus and ventricular zone in embryonic mouse  
242 brain (E18) reveals two-branch differentiation trajectories from progenitor cells to  
243 Granule Cells (DG) and Pyramidal Neurons (CA3) (left). Data source is listed in  
244 **Supplementary Table S1**. The cellular trajectory is determined by Slingshot<sup>32</sup>. (b)  
245 Gene accessibility score of canonical marker genes is projected onto the 2D embedding.  
246  
247 Fourth, SnapATAC has incorporated a function to construct cellular trajectories from  
248 single cell ATAC-seq. As a demonstration of this feature, SnapATAC is used to analyze a  
249 dataset that contains 4,259 cells from the hippocampus in the fetal mouse brain (E18)

250 **(Supplementary Table S1)**. Immature granule cells originating in the dentate gyrus  
251 give rise to both mature granule cells (DG) and pyramidal neurons (CA3)<sup>33</sup>. Analysis of  
252 4,259 cells reveals a clear branching structure in the first two **dimensions (Fig. 3a)**, the  
253 pattern of which is remarkably similar to the result previously obtained from single cell  
254 transcriptomic analysis<sup>34</sup>. For instance, the DG-specific transcription factor *Prox1* is  
255 exclusively accessible in one branch whereas *Neurod6* that is known to be specific to CA3  
256 are accessible in the other branch. Markers of progenitors such as *Hes5* and *Mki67*,  
257 however, are differentially accessible before the branching point **(Fig. 3b)**. Further using  
258 lineage inference tool such as Slingshot<sup>32</sup>, SnapATAC defines the trajectories of cell states  
259 for pseudo-time analysis **(Fig. 3a)**. These results demonstrate that SnapATAC can also  
260 reveal lineage trajectories with high accuracy.

261

## 262 **Performance evaluation**

263 To compare the accuracy of cell clustering between SnapATAC and published scATAC-  
264 seq analysis methods, a simulated dataset of scATAC-seq profiles are generated with  
265 varying coverages, from 10,000 (high coverage) to 1,000 reads per cell (low coverage) by  
266 down sampling from 10 previously published bulk ATAC-seq datasets<sup>27</sup>  
267 **(Supplementary Table S2 and Supplementary Methods)**. **Based on a recent**  
268 **summary of cell ATAC-seq methods<sup>35</sup>, LSA<sup>8</sup> and cisTopic<sup>15</sup> outperforms the other**  
269 **methods in separating cell populations of different coverages and noise levels in both**  
270 **synthetic and real datasets. Therefore, we choose to compare SnapATAC with these two**  
271 **methods.**

272

273 The performance of each method in identifying the original cell types is measured by both  
274 Adjusted Rank Index (ARI) and **Normalized Mutual Index (NMI)**. The comparison shows  
275 that SnapATAC is the most robust and accurate method across all ranges of data sparsity  
276 (Wilcoxon signed-rank test,  $P < 0.01$ ; **Fig. 4a**; **Supplementary Fig. 7** and  
277 **Supplementary Table S3**). Next, a set of 1,423 human cells corresponding to 10  
278 distinct cell types generated using C1 Fluidigm platform, where the ground truth is  
279 known<sup>14</sup>, is analyzed by SnapATAC and other methods. Again, SnapATAC correctly  
280 identifies the cell types with high accuracy **(Supplementary Fig. 8)**.

281

282 To compare the sensitivity of SnapATAC on detecting cell types to that of previously  
283 published methods, we analyzed two scATAC-seq datasets representing different types of  
284 bio-samples. First, to quantify the clustering sensitivity, we applied an existing  
285 integration method to predict the cell type of 4,792 PBMC cells using corresponding 10X  
286 single cell RNA-seq by following the tutorial  
287 ([https://satijalab.org/seurat/v3.1/atacseq\\_integration\\_vignette.html](https://satijalab.org/seurat/v3.1/atacseq_integration_vignette.html)). To obtain the  
288 most confident prediction, we only kept single cell ATAC-seq profiles whose cell type  
289 prediction score is greater than 0.9. Using the remaining cells, we calculated the  
290 connectivity index (CI; **Supplementary Methods**) in the low-dimension manifold for  
291 each of the methods (LSA, cisTopic and SnapATAC). Connectivity index estimates the  
292 degree of separation between clusters in an unbiased manner and a lower connectivity  
293 index represents a higher degree of separation between clusters. SnapATAC exhibits  
294 substantially higher sensitivity in distinguishing different cell types compared to the other  
295 two methods (**Fig. 4b**). The second is a newly produced dataset that contains 9,529 single  
296 nucleus open chromatin profiles generated from the mouse secondary motor cortex.  
297 Based on the gene accessibility score at canonical marker genes (**Supplementary Fig.**  
298 **9**), SnapATAC uncovers 22 distinct cell populations (**Supplementary Fig. 10**) whereas  
299 alternative methods fail to distinguish the rare neuronal subtypes including Sst (Gad2+  
300 and Sst+), Vip (Gad2+ and Vip+), L6b (Sulf1- and Tl4e+) and L6.CT (Sulf1+ and Foxp2+).  
301 These results suggest that SnapATAC outperforms existing methods in sensitivity of  
302 separating different cell types in both synthetic and real datasets.

303  
304 To compare the scalability of SnapATAC to that of existing methods, a previous scATAC-  
305 seq dataset that contains over 80k cells from 13 different mouse tissues<sup>8</sup> is used  
306 (**Supplementary Table S1**). This dataset is down sampled to different number of cells,  
307 ranging from 20,000 to 80,000 cells. For each sampling, SnapATAC and other methods  
308 are performed, and the CPU running time of dimensionality reduction is monitored  
309 (**Supplementary Methods**). The running time of SnapATAC scales linearly and  
310 increases at a significantly lower slope than alternative methods (**Fig. 4c**). Using the same  
311 computing resource, when applied to 100k cells, SnapATAC is much faster than existing  
312 methods (**Fig. 4c**). For instance, when applied to 100k cells, SnapATAC is nearly 10 times  
313 faster than LSA and more than 100 times faster than cisTopic. More importantly, because

314 SnapATAC avoids the loading of the full cell matrix in the memory and can naturally fit  
315 within the distributed computing environments (**Supplementary Methods**), the  
316 running time and memory usage for SnapATAC plateau after 20,000 cells, making it  
317 possible for analyzing datasets of even greater volumes. To test this, we simulate one  
318 million cells of the same coverage with the above dataset (**Supplementary Methods**)  
319 and process it with SnapATAC, LSA and cisTopic. Using the same computing resource,  
320 SnapATAC is the only method that is able to process this dataset (**Fig. 4c** and  
321 **Supplementary Methods**). These results demonstrate that SnapATAC provides a  
322 highly scalable approach for analyzing large-scale scATAC-seq dataset.

323

324 To evaluate the clustering reproducibility, the above mouse scATAC-seq dataset is down-  
325 sampled to 90% of the original sequencing depth in five different iterations. Each down  
326 sampled dataset is clustered using SnapATAC and other methods. Clustering results are  
327 compared between sampled datasets to estimate the stability. SnapATAC has a  
328 substantially higher reproducibility of clustering results between different down-sampled  
329 datasets than other methods (**Fig. 4d**).

330

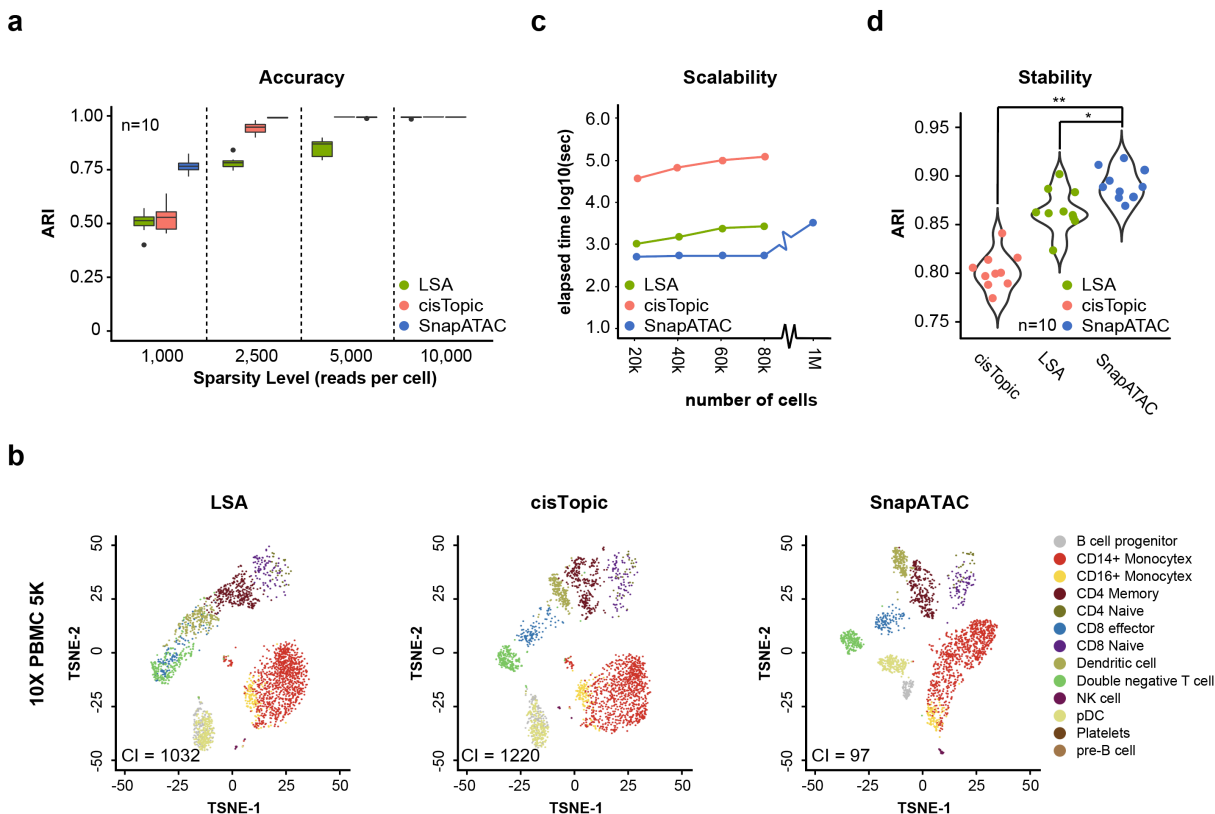

331  
 332 **Figure 4. SnapATAC outperforms current methods in accuracy, sensitivity,**  
 333 **scalability and stability of identifying cell types in complex tissues. (a)** A set of  
 334 simulated datasets are generated with varying coverage ranging from 1,000 to 10,000  
 335 reads per cell cells (**Supplementary Methods**). For each coverage, n=10 random  
 336 replicates are simulated, and clustering accuracy measurement is based on Adjusted Rank  
 337 Index (ARI). **(b)** T-SNE representation of PBMC single cell ATAC-seq profiles analyzed  
 338 by LSA (left), cisTopic (middle) and SnapATAC (right). The cell type identification was  
 339 predicted by 10X PBMC single cell RNA-seq using recent integration method<sup>30</sup>. CI =  
 340 connectivity index (see **Supplementary Methods**). **(c)** A mouse dataset<sup>8</sup> is sampled to  
 341 different number of cells ranging from 20k to 1M. For each sampling, we compared the  
 342 CPU running time of different methods for dimensionality reduction (**Supplementary**  
 343 **Methods**). SnapATAC is the only method that is able to process a dataset of one million  
 344 (1M) cells. **(d)** A set of perturbations (n=5) are introduced to the mouse atlas dataset by  
 345 down sampling to 90% of the original sequencing depth. Clustering outcomes are  
 346 compared between different down sampled datasets (n=10) to estimate the  
 347 reproducibility. One-tailed t-test was performed to estimate the significance level  
 348 between SnapATAC and each of the other two methods (\* < 0.05 and \*\* < 0.01).

349  
 350 The improved performance of SnapATAC likely results from the fact that it considers all  
 351 reads from each cell, not just the fraction of reads within the peaks defined in the

352 population. To test this hypothesis, clustering is performed after removing the reads  
353 overlapping the predefined peak regions. **Although the outcome is worse than the full**  
354 **dataset as expected, it still recapitulates the major cell types obtained from the full dataset**  
355 **(Supplementary Fig. 11)**. This holds true for all three datasets tested  
356 **(Supplementary Fig. 11a-c)**. One possibility is that the off-peak reads may be enriched  
357 for the euchromatin (or compartment A) that strongly correlates with active genes<sup>28</sup> and  
358 varies considerably between cell types<sup>29,30</sup>. Consistent with this hypothesis, the density of  
359 the non-peak reads in scATAC-seq library is highly enriched for the euchromatin  
360 (compartment A) as defined using genome-wide chromatin conformation capture  
361 analysis (i.e. Hi-C) in the same cell type<sup>31</sup> **(Supplementary Fig. 12)**. These observations  
362 suggest that the non-peak reads discarded by existing methods can actually contribute to  
363 distinguish different cell types.

364

365 Including the off-peak reads, however, raises a concern regarding whether SnapATAC is  
366 sensitive to technical variations (also known as batch effect). To test this, SnapATAC is  
367 applied to four datasets generated using different technologies **(Supplementary Table**  
368 **S1)**. Each dataset contains at least two biological replicates produced by the same  
369 technology. In all cases, the biological replicates are well mixed in the t-SNE embedding  
370 space showing no batch effect **(Supplementary Fig. 13)**, suggesting that SnapATAC is  
371 robust to the technical variations.

372

373 To test whether SnapATAC is robust to technical variation introduced by different  
374 technological platforms, it is used to integrate two mouse brain datasets generated using  
375 plate and droplet-based scATAC-seq technologies **(Supplementary Table S1)**. In the  
376 joint t-TSNE embedding space, these two datasets are separated based on the  
377 technologies **(Supplementary Fig. 14a)**. To remove the platform-to-platform  
378 variations, Harmony<sup>23</sup>, a single cell batch effect correction tool, is incorporated into the  
379 SnapATAC pipeline **(Supplementary Methods)**. After applying Harmony<sup>23</sup>, these two  
380 datasets are fully mixed in the joint t-SNE embedding **(Supplementary Fig. 14b)** and  
381 clusters are fairly represented by both datasets **(Supplementary Fig. 14c)**.

382

383 **A high-resolution cis-regulatory atlas of the mouse secondary motor cortex**

384 To demonstrate the utility of SnapATAC in resolving cellular heterogeneity of complex  
385 tissues and identify candidate *cis*-regulatory elements in diverse cell type, it is applied to  
386 a new single nucleus ATAC-seq dataset generated from the secondary mouse motor cortex  
387 in the adult mouse brain as part of the BRAIN Initiative Cell Census Consortium<sup>36</sup>  
388 (**Supplementary Fig. 15a**). This dataset includes two biological replicates, each pooled  
389 from 15 mice to minimize potential batch effects. The aggregate signals show high  
390 reproducibility between biological replicates (Pearson correlation = 0.99;  
391 **Supplementary Fig. 15b-d**) and a significant enrichment for transcription start sites  
392 (TSS), indicating a high signal-to-noise ratio (**Supplementary Fig. 15e**). After filtering  
393 out the low-quality nuclei (**Supplementary Fig. 16a**) and removing putative doublets  
394 using Scrublet<sup>37</sup> (**Supplementary Methods; Supplementary Fig. 16b**), a total of  
395 55,592 nuclear profiles with an average of ~5,000 unique fragments per nucleus remain  
396 and are used for further analysis (**Supplementary Table S4**). **To our knowledge, this**  
397 **dataset represents one of the largest single cell chromatin accessibility studies for a single**  
398 **mammalian brain region to date.**

399

400 SnapATAC identifies initially a total of 20 major clusters using the consensus clustering  
401 approach (**Supplementary Fig. 17**). The clustering result is highly reproducible  
402 between biological replicates (Pearson correlation=0.99; **Supplementary Fig. 18a**)  
403 and is resistant to sequencing depth effect (**Supplementary Fig. 18b**). Based on the  
404 gene accessibility score at the canonical marker genes (**Supplementary Fig. 19**), these  
405 clusters are classified into 10 excitatory neuronal subpopulations (Snap25+, Slc17a7+,  
406 Gad2-; 52% of total nuclei), three inhibitory neuronal subpopulations (Snap25+, Gad2+;  
407 10% of total nuclei), one oligodendrocyte subpopulation (Mog+; 8% of total nuclei), one  
408 oligodendrocyte precursor subpopulation (Pdgfra+; 4% of total nuclei), one microglia  
409 subpopulation (C1qb+; 5% of total nuclei), one astrocyte subpopulation (ApoE+; 12% of  
410 total nuclei), and additional populations of endothelial, and **smooth muscle cells**  
411 accounting for 6% of total nuclei (**Fig. 5a**).

412



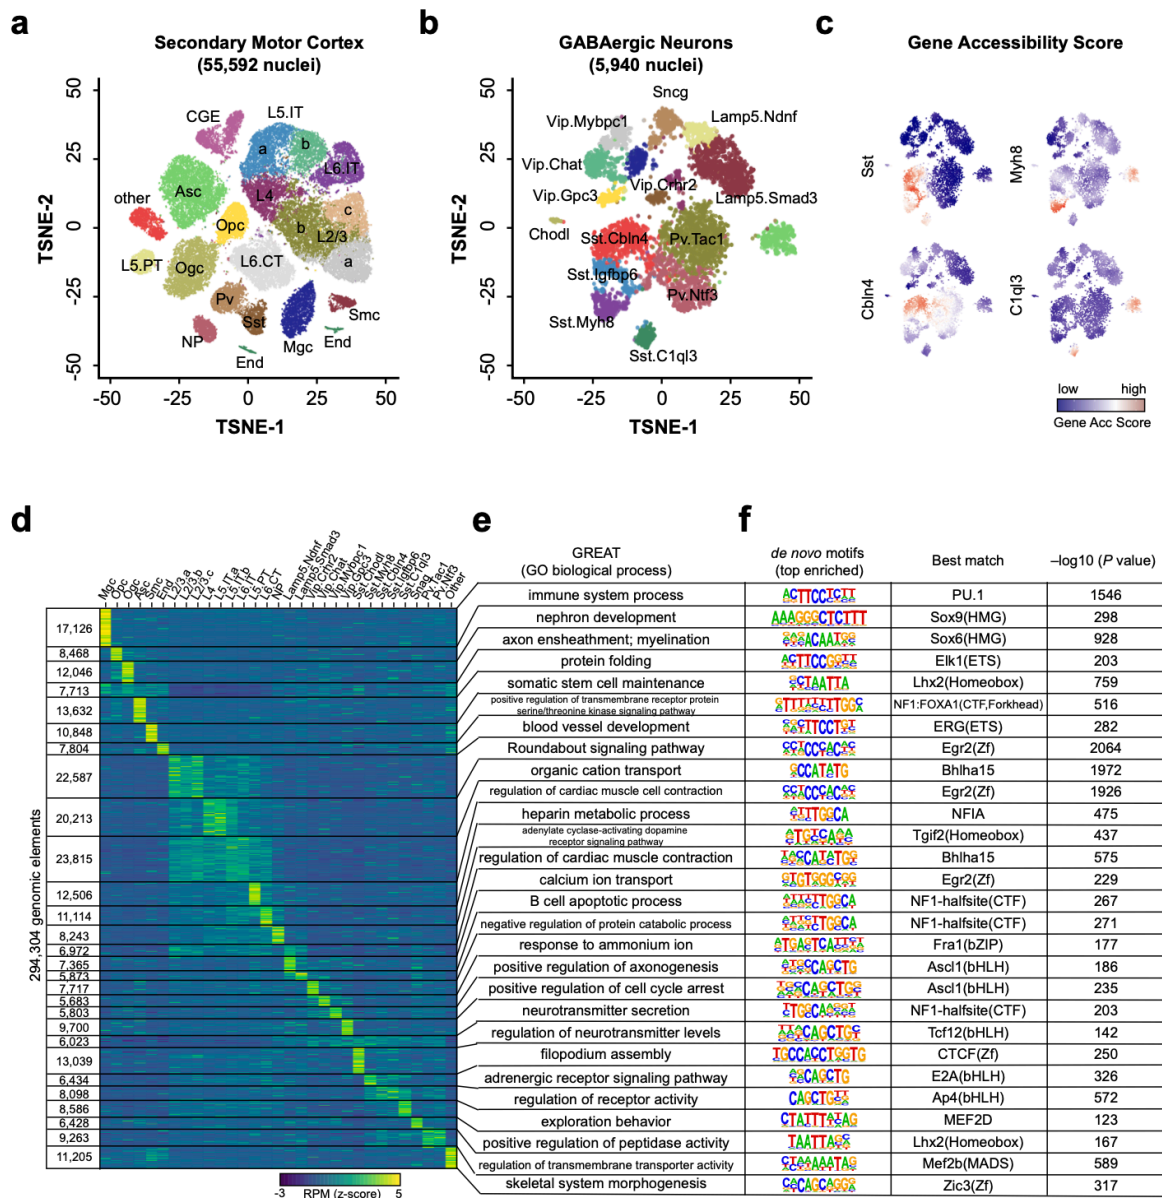

413

414 **Figure 5. A high-resolution cis-regulatory atlas of mouse secondary motor**

415 **cortex (MOs).** (a) T-SNE visualization of 20 cell types in MOs identified using

416 SnapATAC. (b) Fourteen GABAergic subtypes revealed by iterative clustering of 5,940

417 GABAergic neurons (Sst, Pv and CGE). (c) Gene accessibility score of canonical marker

418 genes for GABAergic subtypes projected onto the t-SNE embedding. Marker genes were

419 identified from previous scRNA-seq analysis<sup>38</sup>. (d) *k*-means clustering of 294,304

420 differentially accessible elements based on chromatin accessibility. (e) Gene ontology

421 analysis of each cell type predicted using GREAT analysis<sup>39</sup>. (f) Transcription factor

422 motif enriched in each cell group identified using Homer<sup>21</sup>.

423

424 In mammalian brain, GABAergic interneurons exhibit spectacular diversity that shapes  
425 the spatiotemporal dynamics of neural circuits underlying cognition<sup>40</sup>. To examine  
426 whether iterative analysis could help tease out various subtypes of GABAergic neurons,  
427 SnapATAC is applied to the 5,940 GABAergic nuclei (CGE, Sst and Vip) identified above,  
428 finding 17 distinct sub-populations (**Supplementary Fig. 20a**) that are highly  
429 reproducible between biological replicates (Pearson correlation = 0.99; **Supplementary**  
430 **Fig. 20b**). Based on the chromatin accessibility at the marker genes (**Supplementary**  
431 **Fig. 21**), these 17 clusters are classified into five Sst subtypes (Chodl+, Cbln4+, Igfbp6+,  
432 Myh8+ and C1ql3+), two Pv subtypes (Tac1+ and Ntf3+), two Lamp5 subtypes (Smad3+  
433 and Ndnf+), four Vip subtypes (Mybpc1+, Chat+, Gpc3+, Crhr2+), Sncg and putative  
434 doublets (**Fig. 5b**). These clusters include a rare type Sst-Chodl (0.1%) previously  
435 identified in single cell RNA<sup>38</sup> and single cell ATAC-seq analysis<sup>41</sup>. While the identity and  
436 function of these subtypes require further experimental validation, our results  
437 demonstrate the exquisite sensitivity of SnapATAC in resolving distinct neuronal  
438 subtypes with only subtle differences in the chromatin landscape.

439  
440 A key utility of single cell chromatin accessibility analysis is to identify regulatory  
441 sequences in the genome. By pooling reads from nuclei in each major cluster (**Fig. 5a**),  
442 cell-type specific chromatin landscapes can be obtained (**Supplementary Fig. 22** and  
443 **Supplementary Methods**). Peaks are determined in each cell type, resulting in a total  
444 of 373,583 unique candidate *cis*-regulatory elements. Most notably, 56%  
445 (212,730/373,583) of these open chromatin regions cannot be detected from bulk ATAC-  
446 seq data of the same brain region (**Supplementary Methods**). The validity of these  
447 additional open chromatin regions identified from scATAC-seq data are supported by  
448 several lines of evidence. First, these open chromatin regions are only accessible in minor  
449 cell populations (**Supplementary Fig. 23a**) that are undetectable in the bulk ATAC-seq  
450 signal. Second, these sequences show significantly higher conservation than randomly  
451 selected genomic sequences with comparable mappability scores (**Supplementary Fig.**  
452 **23c**). Third, these open chromatin regions display an enrichment for transcription factor  
453 (TF) binding motifs corresponding to the TFs that play important regulatory roles in the  
454 corresponding cell types. For example, the binding motif for Mef2c is highly enriched in  
455 novel candidate *cis*-elements identified from Pvalb neuronal subtype (P-value = 1e-363;

456 **Supplementary Fig. 23d**), consistent with previous report that Mef2c is upregulated  
457 in embryonic precursors of Pv interneurons<sup>42</sup>. Finally, the new open chromatin regions  
458 tend to test positive in transgenic reporter assays. Comparison to the VISTA enhancer  
459 database<sup>43</sup> shows that enhancer activities of 256 of the newly identified open chromatin  
460 regions have been previously tested using transgenic reporter assays in e11.5 mouse  
461 embryos. Sixty five percent (167/256; 65%) of them drive reproducible reporter  
462 expression in at least one embryonic tissue, which was substantially higher than  
463 background rates (9.7%) estimated from regions in the VISTA database that lack  
464 canonical enhancer mark<sup>44</sup>. Four examples are displayed (**Supplementary Fig. 23e**).

465  
466 SnapATAC identifies 294,304 differentially accessible elements between cell types  
467 (**Supplementary Methods; Fig. 5d**). GREAT analysis (**Fig. 5e**) and motif inference  
468 (**Fig. 5f**) identify the master regulators and transcriptional pathways active in each of the  
469 cell types. For instance, the binding motif for ETS-factor PU.1 is highly enriched in  
470 microglia-specific candidate CREs, motifs for SOX proteins are enriched in Ogc-specific  
471 elements, and bHLH motifs are enriched in excitatory neurons-specific CREs (**Fig. 5f**).  
472 Interestingly, motifs for candidate transcriptional regulators, including NUCLEAR  
473 FACTOR 1 (NF1), are also enriched in candidate CREs detected in two inhibitory neuron  
474 subtypes (Lamp5.Ndnf and Lamp5.Smad3). Motif for CTCF, a multifunctional protein in  
475 genome organization and gene regulation<sup>45</sup>, is highly enriched in Sst-Chodl, indicating  
476 that CTCF may play a role in neurogenesis. Finally, motifs for different basic-helix-loop-  
477 helix (bHLH) family transcription factors, known determinants of neural differentiation<sup>46</sup>,  
478 show enrichment for distinct Sst subtypes. For instance, E2A motif is enriched in  
479 candidate CREs found in Sst.Myh8 whereas AP4 motif is specifically enriched in peaks  
480 found in Sst.Cbln4, suggesting specific role that different bHLH factors might play in  
481 different neuronal subtypes.

482  
483 **SnapATAC enables reference-based annotation of new scATAC-seq datasets**  
484 Unsupervised clustering of scATAC-seq datasets frequently requires manual annotation,  
485 which is labor-intensive and limited to prior knowledge. To overcome this limitation,  
486 SnapATAC provides a function to project new single cell ATAC-seq datasets to an existing  
487 cell atlas to allow for supervised annotation of cells. First, the Nystrom method is used to

488 project the query cells to the low-dimension manifold pre-computed from the reference  
 489 cells (**Supplementary Methods**). In the joint manifold, a neighborhood-based  
 490 classifier is used to determine the cell type of each query cell based on the label of its  $k$   
 491 nearest neighboring cells in the reference dataset (**Supplementary Methods**). The  
 492 accuracy of this method is determined by five-fold cross validation using the mouse motor  
 493 cortex atlas. On average, 98% ( $\pm 1\%$ ) of the cells can be correctly classified, suggesting a  
 494 high accuracy of the method (**Fig. 6a**).

495

496 To demonstrate that SnapATAC could be applied to datasets generated from distinct  
 497 technical platforms, it is used to annotate 4,098 scATAC-seq profiles from mouse brain  
 498 cells generated using a droplet-based platform (**Supplementary Table 2**). After  
 499 removing batch effect introduced by different platforms using Harmony<sup>23</sup>, the query cells  
 500 are well mixed with the reference cells in the joint embedding space (**Supplementary**  
 501 **Fig. 24**). The predicted cluster labels are also consistent with the cell types defined using  
 502 unbiased clustering analysis (NMI=0.85, ARI=0.68; **Fig. 6b**).

503

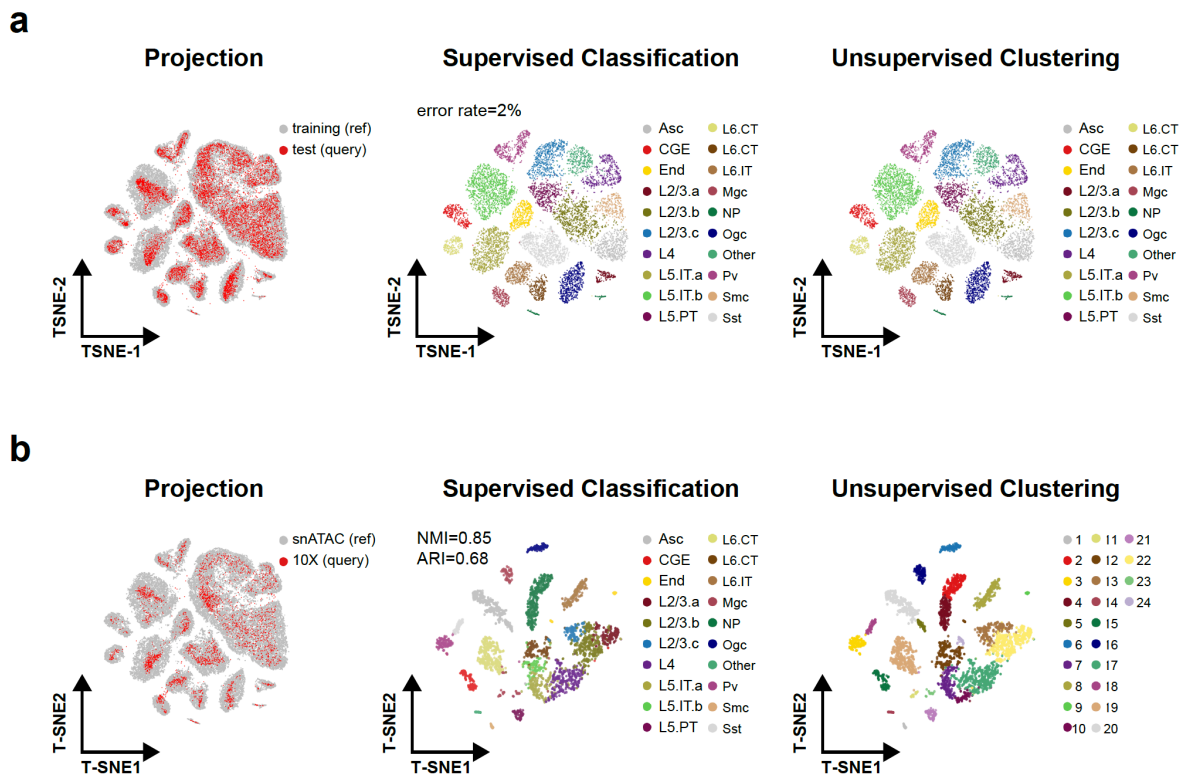

504

505 **Figure 6. SnapATAC enables supervised annotation of new scATAC-seq**  
506 **dataset using reference cell atlas. (a)** MOs snATAC-seq dataset is split into 80% and  
507 20% as training and test dataset. A predictive model learned from the training dataset  
508 predicts cell types on the test dataset of high accuracy (error rate = 2%) as compared to  
509 the original cell type labels (right). **(b)** A predictive model learned from the reference  
510 dataset - MOs (snATAC) – accurately predicts the cell types on a query dataset from  
511 mouse brain generated using a different technological platform, the 10X scATAC-seq. The  
512 t-SNE embedding is inferred from the reference cell atlas (left) or generated by SnapATAC  
513 in an unbiased manner from 10X mouse brain dataset (middle and right). Cells are  
514 visualized using t-SNE and are colored by the cell types predicted by supervised  
515 classification (middle) compared to the cluster labels defined using unsupervised  
516 clustering (right).

517

518 To investigate whether SnapATAC could recognize cell types in the query dataset that are  
519 not present in the reference atlas, multiple query data sets are sampled from the above  
520 mouse motor cortex dataset and a perturbation is introduced to each sampling by  
521 randomly dropping a cell cluster. When this resulting query dataset is analyzed by  
522 SnapATAC against the original cell atlas, the majority of the cells that are left out from the  
523 original atlas are filtered out due to the low prediction score (**Supplementary Fig. 25**),  
524 again suggesting that our method is not only accurate but also robust to the novel cell  
525 types in the query dataset.

526

## 527 **Discussion**

528 In summary, SnapATAC is a comprehensive bioinformatic solution for single cell ATAC-  
529 seq analysis. The open-source software runs on standard hardware, making it accessible  
530 to a broad spectrum of researchers. Through extensive benchmarking, we have  
531 demonstrated that SnapATAC outperforms existing tools in sensitivity, accuracy,  
532 scalability and robustness of identifying cell types in complex tissues.

533

534 SnapATAC differs from previous methods in at least seven aspects. **First, SnapATAC**  
535 **incorporates many useful tools and represents the most comprehensive solution for single**  
536 **cell ATAC-seq data analysis to date. In addition to clustering analysis, SnapATAC**  
537 **provides preprocessing, annotation, trajectory analysis, peak calling<sup>26</sup>, differential**  
538 **analysis<sup>22</sup>, batch effect correction<sup>23</sup> and motif discovery<sup>27</sup> all in one package. Second,**

539 SnapATAC identifies cell types in an unbiased manner without the need for population-  
540 level peak annotation, leading to superior sensitivity for identifying rare cell types in  
541 complex tissues. **Third, SnapATAC utilizes a new algorithm for dimensionality reduction  
542 and to identify cell types in heterogeneous tissues and map cellular trajectories.** Fourth,  
543 with Nyström sampling method<sup>47</sup>, SnapATAC significantly reduces both CPU and  
544 memory usage, enabling analysis of large-scale dataset of a million cells or more. **Fifth,  
545 SnapATAC not only incorporates existing method to integrate scATAC-seq with scRNA-  
546 seq dataset<sup>30</sup>** but also provides a new method to predict promoter-enhancer pairing  
547 relations based on the statistical association between gene expression and chromatin  
548 accessibility in single cells. Sixth, our method achieves high clustering reproducibility  
549 using a consensus clustering approach. Finally, SnapATAC also enables supervised  
550 annotation of a new scATAC-seq dataset based on an existing reference cell atlas.

551

552 It is important to note that a different strategy has been used to overcome the bias  
553 introduced by population-based peak annotation<sup>8</sup>. This approach involves iterative  
554 clustering, with the first round defining the “crude” clusters in complex tissues followed  
555 by identifying peaks in these clusters, which are then used in subsequent round(s) of  
556 clustering. **However, several limitations still exist. First, the strategy of iterative clustering  
557 requires multiple rounds of clustering, aggregation, and peak calling, thus hindering its  
558 application to large-scale datasets. Second, the “crude” clusters represent the most  
559 dominant cell types in the tissues; therefore, peaks in the rare populations may still be  
560 underrepresented. Finally, peak-based methods hinder multi-sample integrative analysis  
561 where each sample has its own unique peak reference.**

562

563 Finally, SnapATAC is applied to a newly generated scATAC-seq dataset including 55,592  
564 high quality single nucleus ATAC-seq profiles from the mouse secondary motor cortex,  
565 resulting in a single cell atlas consisting of >370,000 candidate *cis*-regulatory elements  
566 across 31 cell types in this mouse brain region. The cellular diversity identified by  
567 chromatin accessibility is at an unprecedented resolution and is consistent with mouse  
568 neurogenesis and taxonomy revealed by single cell transcriptome data<sup>38,48</sup>. Besides  
569 characterizing the constituent cell types, SnapATAC identifies candidate *cis*-regulatory  
570 sequences in each of the major cell types and infers the likely transcription factors that

571 regulate cell-type specific gene expression programs. Importantly, a large fraction (56%)  
572 of the candidate *cis*-elements identified from the scATAC-seq data are not detected in  
573 bulk analysis. While further experiments to thoroughly validate the function of these  
574 additional open chromatin regions are needed, the ability for SnapATAC to uncover *cis*-  
575 elements from rare cell types of a complex tissue will certainly help expand the catalog of  
576 *cis*-regulatory sequences in the genome.

577

### 578 **Data availability**

579 Raw and processed data to support the findings of this study have been deposited to  
580 NCBI Gene Expression Omnibus with the accession number GSE126724 **with the token**  
581 **of srkxoisclpkppcd.**

582

### 583 **Code availability**

584 The scripts and pipeline for the analysis can be found at  
585 <https://github.com/r3fang/SnapATAC>.

### 586 **Acknowledgements**

587 We thank D. Gorkin, R. Raviram, and J. Hocker for proofreading and suggestions for the  
588 manuscript. We thank S. Kuan for sequencing support. We thank C. Zhang and B. Li for  
589 Bioinformatics support. We thank C. O'Connor and C. Fitzpatrick at Salk Institute Flow  
590 Cytometry Core for sorting of nuclei. This study was funded by U19MH114831.

591

### 592 **Author Contributions**

593 This study was conceived and designed by R.F. and B.R.; Pipeline developed by R.F.; Data  
594 analysis performed by R.F.; Tissue collection and nuclei preparation performed by J.L.  
595 and M.B.; Single nucleus ATAC-seq experiment performed by S.P., X.H. and X.W.; Tn5  
596 enzymes synthesized and provided by A.M. and A.S.; Manuscript written by R.F. and B.R.  
597 with input from all authors.

598

### 599 **Competing Financial Interest Statement**

600 The authors declare no competing financial interests.

601 **REFERENCE**

- 602 1. The ENCODE Project Consortium. An integrated encyclopedia of DNA elements in the  
603 human genome. *Nature* **489**, 57–74 (2012).
- 604 2. Shen, Y. *et al.* A map of the *cis*-regulatory sequences in the mouse genome. *Nature* **488**,  
605 116–120 (2012).
- 606 3. Buenrostro, J. D., Giresi, P. G., Zaba, L. C., Chang, H. Y. & Greenleaf, W. J. Transposition  
607 of native chromatin for fast and sensitive epigenomic profiling of open chromatin, DNA-  
608 binding proteins and nucleosome position. *Nat. Methods* **10**, 1213–1218 (2013).
- 609 4. Boyle, A. P. *et al.* High-Resolution Mapping and Characterization of Open Chromatin across  
610 the Genome. *Cell* **132**, 311–322 (2008).
- 611 5. Cusanovich, D. A. *et al.* Multiplex single-cell profiling of chromatin accessibility by  
612 combinatorial cellular indexing. *Science* **348**, 910–914 (2015).
- 613 6. Cusanovich, D. A. *et al.* The *cis*-regulatory dynamics of embryonic development at single-  
614 cell resolution. *Nature* **555**, 538–542 (2018).
- 615 7. Preissl, S. *et al.* Single-nucleus analysis of accessible chromatin in developing mouse  
616 forebrain reveals cell-type-specific transcriptional regulation. *Nat. Neurosci.* **21**, 432 (2018).
- 617 8. Cusanovich, D. A. *et al.* A Single-Cell Atlas of In Vivo Mammalian Chromatin  
618 Accessibility. *Cell* **174**, 1309-1324.e18 (2018).
- 619 9. Lake, B. B. *et al.* Integrative single-cell analysis of transcriptional and epigenetic states in  
620 the human adult brain. *Nat. Biotechnol.* **36**, 70–80 (2018).
- 621 10. Buenrostro, J. D. *et al.* Single-cell chromatin accessibility reveals principles of regulatory  
622 variation. *Nature* **523**, 486–490 (2015).
- 623 11. Mezger, A. *et al.* High-throughput chromatin accessibility profiling at single-cell resolution.  
624 *Nat. Commun.* **9**, 3647 (2018).



- 625 12. Satpathy, A. T. *et al.* Massively parallel single-cell chromatin landscapes of human immune  
626 cell development and intratumoral T cell exhaustion. *bioRxiv* (2019) doi:10.1101/610550.
- 627 13. Lareau, C. A. *et al.* Droplet-based combinatorial indexing for massive-scale single-cell  
628 chromatin accessibility. *Nat. Biotechnol.* (2019) doi:10.1038/s41587-019-0147-6.
- 629 14. Schep, A. N., Wu, B., Buenrostro, J. D. & Greenleaf, W. J. chromVAR: inferring  
630 transcription-factor-associated accessibility from single-cell epigenomic data. *Nat. Methods*  
631 **14**, 975–978 (2017).
- 632 15. Bravo González-Blas, C. *et al.* cisTopic: cis-regulatory topic modeling on single-cell ATAC-  
633 seq data. *Nat. Methods* **16**, 397–400 (2019).
- 634 16. de Boer, C. G. & Regev, A. BROCKMAN: deciphering variance in epigenomic regulators  
635 by k-mer factorization. *BMC Bioinformatics* **19**, (2018).
- 636 17. Pliner, H. A. *et al.* Cicero Predicts cis-Regulatory DNA Interactions from Single-Cell  
637 Chromatin Accessibility Data. *Mol. Cell* **71**, 858-871.e8 (2018).
- 638 18. Stuart, T. *et al.* Comprehensive Integration of Single-Cell Data. *Cell* **177**, 1888-1902.e21  
639 (2019).
- 640 19. Kumar, S., Mohri, M. & Talwalkar, A. Sampling Methods for the Nystroïm Method. 26.
- 641 20. Long, A. W. & Ferguson, A. L. Landmark Diffusion Maps (L-dMaps): Accelerated manifold  
642 learning out-of-sample extension. *Appl. Comput. Harmon. Anal.* **47**, 190–211 (2019).
- 643 21. Heinz, S. *et al.* Simple Combinations of Lineage-Determining Transcription Factors Prime  
644 cis-Regulatory Elements Required for Macrophage and B Cell Identities. *Mol. Cell* **38**, 576–  
645 589 (2010).

- 646 22. Robinson, M. D., McCarthy, D. J. & Smyth, G. K. edgeR: a Bioconductor package for  
647 differential expression analysis of digital gene expression data. *Bioinformatics* **26**, 139–140  
648 (2010).
- 649 23. Korsunsky, I. *et al.* Fast, sensitive and accurate integration of single-cell data with Harmony.  
650 *Nat. Methods* **16**, 1289–1296 (2019).
- 651 24. Rubin, A. J. *et al.* Coupled Single-Cell CRISPR Screening and Epigenomic Profiling  
652 Reveals Causal Gene Regulatory Networks. *Cell* **176**, 361-376.e17 (2019).
- 653 25. Fairfax, B. P. *et al.* Innate Immune Activity Conditions the Effect of Regulatory Variants  
654 upon Monocyte Gene Expression. *Science* **343**, 1246949–1246949 (2014).
- 655 26. Zhang, Y. *et al.* Model-based Analysis of ChIP-Seq (MACS). *Genome Biol.* **9**, R137 (2008).
- 656 27. Heinz, S. *et al.* Simple Combinations of Lineage-Determining Transcription Factors Prime  
657 cis-Regulatory Elements Required for Macrophage and B Cell Identities. *Mol. Cell* **38**, 576–  
658 589 (2010).
- 659 28. McLean, C. Y. *et al.* GREAT improves functional interpretation of cis-regulatory regions.  
660 *Nat. Biotechnol.* **28**, 495–501 (2010).
- 661 29. Wu, J. *et al.* The landscape of accessible chromatin in mammalian preimplantation embryos.  
662 *Nature* **534**, 652–657 (2016).
- 663 30. Stuart, T. *et al.* Comprehensive Integration of Single-Cell Data. *Cell* **177**, 1888-1902.e21  
664 (2019).
- 665 31. Lieberman-Aiden, E. *et al.* Comprehensive Mapping of Long-Range Interactions Reveals  
666 Folding Principles of the Human Genome. *Science* **326**, 289–293 (2009).
- 667 32. Street, K. *et al.* Slingshot: cell lineage and pseudotime inference for single-cell  
668 transcriptomics. *BMC Genomics* **19**, (2018).

- 669 33. Zhao, C., Deng, W. & Gage, F. H. Mechanisms and Functional Implications of Adult  
670 Neurogenesis. *Cell* **132**, 645–660 (2008).
- 671 34. Rosenberg, A. B. *et al.* Single-cell profiling of the developing mouse brain and spinal cord  
672 with split-pool barcoding. *Science* **360**, 176–182 (2018).
- 673 35. Chen, H. *et al.* Assessment of computational methods for the analysis of single-cell ATAC-  
674 seq data. *Genome Biol.* **20**, 241 (2019).
- 675 36. Ecker, J. R. *et al.* The BRAIN Initiative Cell Census Consortium: Lessons Learned toward  
676 Generating a Comprehensive Brain Cell Atlas. *Neuron* **96**, 542–557 (2017).
- 677 37. Wolock, S. L., Lopez, R. & Klein, A. M. Scrublet: Computational Identification of Cell  
678 Doublets in Single-Cell Transcriptomic Data. *Cell Syst.* **8**, 281-291.e9 (2019).
- 679 38. Tasic, B. *et al.* Adult mouse cortical cell taxonomy revealed by single cell transcriptomics.  
680 *Nat. Neurosci.* **19**, 335–346 (2016).
- 681 39. McLean, C. Y. *et al.* GREAT improves functional interpretation of *cis*-regulatory regions.  
682 *Nat. Biotechnol.* **28**, 495–501 (2010).
- 683 40. Huang, Z. J. & Paul, A. The diversity of GABAergic neurons and neural communication  
684 elements. *Nat. Rev. Neurosci.* (2019) doi:10.1038/s41583-019-0195-4.
- 685 41. Graybuck, L. T. *et al.* *Prospective, brain-wide labeling of neuronal subclasses with*  
686 *enhancer-driven AAVs.* <http://biorxiv.org/lookup/doi/10.1101/525014> (2019)  
687 doi:10.1101/525014.
- 688 42. Mayer, C. *et al.* Developmental diversification of cortical inhibitory interneurons. *Nature*  
689 **555**, 457–462 (2018).
- 690 43. Visel, A., Minovitsky, S., Dubchak, I. & Pennacchio, L. A. VISTA Enhancer Browser—a  
691 database of tissue-specific human enhancers. *Nucleic Acids Res.* **35**, D88–D92 (2007).

- 692 44. Gorkin, D. *et al.* Systematic mapping of chromatin state landscapes during mouse  
693 development. *bioRxiv* 166652 (2017) doi:10.1101/166652.
- 694 45. Phillips, J. E. & Corces, V. G. CTCF: Master Weaver of the Genome. *Cell* **137**, 1194–1211  
695 (2009).
- 696 46. Kageyama, R., Ishibashi, M., Takebayashi, K. & Tomita, K. bHLH Transcription factors and  
697 mammalian neuronal differentiation. *Int. J. Biochem. Cell Biol.* **29**, 1389–1399 (1997).
- 698 47. Erichson, N. B., Mathelin, L., Brunton, S. L. & Kutz, J. N. Diffusion Maps meet Nyström.  
699 *ArXiv180208762 Cs Stat* (2018).
- 700 48. Zeisel, A. *et al.* Molecular Architecture of the Mouse Nervous System. *Cell* **174**, 999-  
701 1014.e22 (2018).
- 702 49. Yan, F., Powell, D. R., Curtis, D. J. & Wong, N. C. From reads to insight: a hitchhiker's  
703 guide to ATAC-seq data analysis. *Genome Biol.* **21**, 22 (2020).
- 704 50. Blondel, V. D., Guillaume, J.-L., Lambiotte, R. & Lefebvre, E. Fast unfolding of  
705 communities in large networks. *J. Stat. Mech. Theory Exp.* **2008**, P10008 (2008).
- 706 51. Hafemeister, C. & Satija, R. Normalization and variance stabilization of single-cell RNA-seq  
707 data using regularized negative binomial regression. *bioRxiv* (2019) doi:10.1101/576827.
- 708 52. Li, M., Kwok, J. T. & Lu, B.-L. Making Large-Scale Nyström Approximation Possible. 12.
- 709 53. Kumar, S., Mohri, M. & Talwalkar, A. Ensemble Nystrom Method. 9.
- 710 54. Luo, C. *et al.* Single-cell methylomes identify neuronal subtypes and regulatory elements in  
711 mammalian cortex. *Science* **357**, 600–604 (2017).
- 712 55. Lister, R. *et al.* Global Epigenomic Reconfiguration During Mammalian Brain Development.  
713 *Science* **341**, 1237905 (2013).

- 714 56. Picelli, S. *et al.* Tn5 transposase and tagmentation procedures for massively scaled  
715 sequencing projects. *Genome Res.* **24**, 2033–2040 (2014).
- 716 57. Zhang, Y. *et al.* Model-based Analysis of ChIP-Seq (MACS). *Genome Biol.* **9**, R137 (2008).
- 717 58. Rao, S. S. P. *et al.* A 3D Map of the Human Genome at Kilobase Resolution Reveals  
718 Principles of Chromatin Looping. *Cell* **159**, 1665–1680 (2014).
- 719

720  
721  
722  
723  
724  
725  
726  
727  
728  
729  
730  
731

## Supplementary Materials

### **SnapATAC: A Comprehensive Analysis Package for Single Cell ATAC-seq**

Rongxin Fang<sup>1,2</sup>, Sebastian Preissl<sup>3</sup>, Yang Li<sup>2</sup>, Xiaomeng Hou<sup>3</sup>, Jacinta Lucero<sup>4</sup>, Xinxin Wang<sup>3</sup>, Amir Motamedi<sup>5</sup>, Andrew K. Shiau<sup>5</sup>, Xinzhu Zhou<sup>6</sup>, Fangming Xie<sup>7</sup>, Eran A. Mukamel<sup>7</sup>, Kai Zhang<sup>2</sup>, Yanxiao Zhang<sup>2</sup>, M. Margarita Behrens<sup>4</sup>, Joseph R. Ecker<sup>4,8</sup>, and Bing Ren<sup>2,3,9\*</sup>

\*Correspondence to: [biren@ucsd.edu](mailto:biren@ucsd.edu)

## 732 **Outline of the SnapATAC Pipeline**

### 733 *Barcode Demultiplexing*

734 Using a custom python script, we first de-multicomplex FASTQ files by integrating the  
735 cell barcode into the read name in the following format:

736

737 `"@"+"barcode"+":"+original_read_name".`

738

### 739 *Alignment & sorting*

740 **Demultiplexed** reads are aligned to the corresponding reference genome (i.e. mm10 or  
741 hg19) using bwa (0.7.13-r1126) in pair-end mode with default parameter settings. Aligned  
742 reads are then sorted based on the read name using samtools (v1.9) to group together  
743 reads originating from the same barcodes.

744

### 745 *Quality Control & Filtering*

746 **Pair-end reads are converted into fragments and only those that meet the following**  
747 **criteria are kept: 1) properly paired (according to SMA flag value); 2) uniquely mapped**  
748 **(MAPQ > 30); 3) insert distance within [50-1000bp]. PCR duplicates (fragments sharing**  
749 **exactly the same genomic coordinates) are removed for each cell separately. Given that**  
750 **Tn5 introduces a 9 bp staggered, reads mapping to the positive and negative strand were**  
751 **shifted by +4 / -5bp respectively<sup>49</sup>.**

752

753 **We identify the high-quality cells based on two criteria: 1) total number of unique**  
754 **fragment count [>1,000]; 2) fragments in promoter ratio – the percentage of fragments**  
755 **overlapping with annotated promoter regions [0.2-0.8]. The promoter regions used in**  
756 **this study are downloaded from 10X genomics for hg19 and mm10.**

757

### 758 *Snap File Generation*

759 Using the remaining fragments, we next generate a snap-format (Single-Nucleus  
760 Accessibility Profiles) file using snaptools (<https://github.com/r3fang/SnapTools>). A  
761 snap file is a hierarchically structured hdf5 file that contains the following **sections**:  
762 header (HD), cell-by-bin matrix (BM), cell-by-peak matrix (PM), cell-by-gene matrix  
763 (GM), barcode (BD) and fragment (FM). HD session contains snap-file version, date,

764 alignment and reference genome information. BD session contains all unique barcodes  
765 and corresponding meta data. BM session contains cell-by-bin matrices of different  
766 resolutions. PM session contains cell-by-peak count matrix. GM session contains cell-by-  
767 gene count matrix. FM session contains all usable fragments for each cell. Fragments are  
768 indexed based on barcodes that enables fast retrieval of reads based on the barcodes.  
769 Detailed information about snap file can be found in **Supplementary Note 1**.  
770

### **Box1. Generating Snap file using snaptools**

```
snaptools snap-pre
  --input-file=demo.srt.bed.gz
  --output-snap=demo.snap
  --genome-name=mm10
  --genome-size=mm10.gs
  --min-mapq=30
  --min-flen=50
  --max-flen=1000
  --keep-single=False
  --keep-secondary=False
  --keep-discordant=False
  --min-cov=0
  --max-num=20000
  --keep-chrm=True
  --overwrite=True
```

771  
772 One major utility of the snap file and snaptools is to retrieve reads belonging to a certain  
773 group of barcodes. This can be done using snaptools with following command where  
774 “barcodes.sel.txt” is a text file that contains the selected barcodes.  
775

### **Box2. Extracting reads using SnapTools**

```
snaptools dump-fragment
  --snap-file=demo.snap
```



```
--barcode-file=barcodes.sel.txt  
--output-file=demo.sel.bed.gz
```

776

### 777 *Creating Cell-by-Bin Count Matrix*

778 Using the resulting snap file, we next create cell-by-bin count matrix. The genome is  
779 segmented into uniform-sized bins and single cell ATAC-seq profiles are represented as  
780 cell-by-bin matrix with each element indicating number of sequencing fragments  
781 overlapping with a given bin in a certain cell. In the below example, a cell-by-bin matrix  
782 of 5kb resolution is added to demo.snap file.

783

#### **Box 3. Generating cell-by-bin matrix using SnapTools**

```
snaptools snap-add-bmat --snap-file=demo.snap --bin-size-list 5000
```

784

### 785 *Optimizing the Bin Size*

786 To evaluate the effect of bin size to clustering performance, we apply SnapATAC to three  
787 datasets namely 5K PBMC (10X), Mouse Brain (10X) and MOs-M1 (snATAC). These  
788 datasets are generated by both plate and droplet platforms using either cell or nuclei with  
789 considerably different depth, allowing us to systematically evaluate the effect of bin size.

790

791 For each dataset, we first define the “landmark” cell types in a supervised manner. First,  
792 we perform cisTopic<sup>15</sup> for dimensionality reduction and identify cell clusters using graph-  
793 based algorithm Louvain<sup>50</sup> with  $k=15$ . Second, we manually define the major cell types in  
794 each dataset by examining the gene accessibility score at the canonical marker genes (**see**  
795 **Supplementary Fig. 9 as an example for MOs-M1**). Third, clusters sharing the same  
796 marker genes are manually merged and those failing to show unique signatures are  
797 discarded. In total, we define nine cell types in PBMC 5K (10X), 14 types in Mouse Brain  
798 5K (10X) and 14 types in MOs M1 (snATAC). Among these cell types, 14 cell populations  
799 that account for less than 2% of the total population are considered as rare cell  
800 populations (**Supplementary Fig. 2a**).

801

802 We next evaluate the performance of each bin size selection using three metrics: 1) cluster  
803 connectivity index (CI) which estimate the degree of connectedness of the landmark cell  
804 types; a lower CI represents a better separation. **The connectivity index is computed in**  
805 **the following manner. For each cell  $i$ , the  $K$  ( $K=15$ ) nearest neighbors are found and sorted**  
806 **from the closest to furthest. The algorithm checks if those neighbors are assigned to the**  
807 **same cluster with cell  $i$ . At the beginning connectivity value is equal 0 and increase with**  
808 **value  $1/i$  when the  $i$ -th nearest neighbors is not assigned to the same cluster with cell  $i$ .**  
809 **This procedure is repeated for all cells in the dataset. In general, the higher the**  
810 **connectivity index is, the less separated the defined landmarks are. The connectivity index**  
811 **is computed using “connectivity” function implemented in R package *clv*. 2) coverage bias**  
812 **which estimates the read depth distribution in the two-dimensional embedding space; 3)**  
813 **sensitivity to identify rare populations. Through systematic benchmarking, we found that**  
814 **bin size in the range from 1kb to 10kb appeared to work well on the three benchmarks, we**  
815 **selected 5kb as the default bin width for all the analysis in this work (**Supplementary****  
816 **Methods and Supplementary Fig. 2).**

817

### 818 Matrix Binarization

819 We found that the vast majority of the elements in the cell-by-bin count matrix is “0”,  
820 indicating either closed chromatin or missing value. Among the non-zero elements, some  
821 has abnormally high coverage ( $> 200$ ) perhaps due to the alignment errors. These items  
822 usually account for less than 0.1% of total non-zero items in the matrix. **Thus, we change**  
823 **the top 0.1% elements in the matrix to “0” to eliminate potential alignment errors.** We  
824 next convert the remaining non-zero elements to “1”.

825

### 826 Bin Filtering

827 We next filter out any bins overlapping with the ENCODE blacklist downloaded from  
828 <http://mitra.stanford.edu/kundaje/akundaje/release/blacklists/>. Second, we remove  
829 reads mapped to the X/Y chromosomes and mitochondrial DNA. **We sort the bins based**  
830 **on the coverage and filter out the top 5% to remove the invariant features. Please note**  
831 **that we do not perform coverage-based bin filtering for a dataset that has low coverage**

832 (average fragment number less than 5,000) where the ranking of bin may be fluctuated  
833 by the noise.

834

### 835 Dimensionality Reduction

836 We next apply the following dimensionality reduction method to project the high-  
837 dimension data to a low-dimension manifold for clustering and visualization. Now, let us  
838 express the algorithm in matrix notation. Let  $\mathbf{X} \in \mathcal{R}^{n \times m}$  be a dataset with  $n$  cells and  $m$   
839 bins and  $\mathbf{X} = \{\mathbf{0}, \mathbf{1}\}$ . The first step is to compute a similarity matrix between the  $m$  high-  
840 dimensional data points to construct the  $n$ -by- $n$  pairwise similarity matrix using a kernel  
841 function  $k$  that is an appropriate similarity metric. A popular choice is gaussian kernel:

842

$$843 \quad k(\mathbf{x}_i, \mathbf{x}_j) = \exp\left(-\frac{\|\mathbf{x}_i - \mathbf{x}_j\|}{\epsilon}\right)$$

844

845 where  $\|\cdot\|$  is a square root of Euclidean distance between observations  $i$  and  $j$ .

846

847 Due the binarization nature of single cell ATAC-seq dataset, in this case, we replace the  
848 Gaussian kernel with Jaccard coefficient which estimates the similarity between cells  
849 simply based on ratio of overlap over the total union:

850

$$851 \quad \text{jaccard}(\mathbf{x}_i, \mathbf{x}_j) = \frac{|\mathbf{x}_i \cap \mathbf{x}_j|}{|\mathbf{x}_i \cup \mathbf{x}_j|}$$

852

853

854 For instance, given two cells  $\mathbf{x}_i = \{\mathbf{0}, \mathbf{1}, \mathbf{1}, \mathbf{0}\}$  and  $\mathbf{x}_j = \{\mathbf{1}, \mathbf{0}, \mathbf{1}, \mathbf{1}\}$ , the Jaccard coefficient is  
855  $\text{jaccard}(\mathbf{x}_i, \mathbf{x}_j) = 1/4$ . The Jaccard coefficient has the following properties that meet the  
856 requirement of being a kernel function:

857

$$858 \quad \text{jaccard}(\mathbf{x}_i, \mathbf{x}_j) = \text{jaccard}(\mathbf{x}_j, \mathbf{x}_i) \text{ (symmetric)}$$

$$859 \quad \text{jaccard}(\mathbf{x}_i, \mathbf{x}_j) \geq 0 \text{ (positivity preserving)}$$

860

861 Using *jaccard* as a kernel function, we next form a symmetric kernel matrix  $J \in \mathcal{R}^{n \times n}$   
862 where each entry is obtained as  $J_{i,j} = \text{jaccard}(x_i, x_j)$

863

864 Theoretically, the similarity  $J_{i,j}$  would reflect the true similarity between cell  $x_i$  and  $x_j$ .  
865 Unfortunately, due to the high-dropout rate, this is not the case. If there is a high  
866 sequencing depth for cell  $x_i$  or  $x_j$ , then  $J_{i,j}$  tend to have higher values, regardless whether  
867 cell  $x_i$  and  $x_j$  is actually similar or not.

868

869 This can be proved **theoretically**. Given 2 cells  $x_i$  and  $x_j$  and corresponding coverage  
870 (number of “1”s)  $C_i = \sum_k x_{ik}$  and  $C_j = \sum_k x_{jk}$ , let  $P_i = C_i/m$  and  $P_j = C_j/m$  be the  
871 probability of observing a signal in cell  $x_i$  and  $x_j$  where  $m$  is the length of the vector.  
872 Assuming  $x_i$  and  $x_j$  are two “random” cells without any biological relevance, in another  
873 word, the “1”s in  $x_i$  and  $x_j$  are randomly distributed, then the expected Jaccard index  
874 between cell  $x_i$  and  $x_j$  can be calculated simply as:

875

$$876 \quad E_{ij} = \frac{P_i P_j}{P_i + P_j - P_i P_j}$$

877

878 Because  $P_i \times P_j > 0$  (no empty cells allowed), then

879

$$880 \quad E_{ij} = \frac{1}{(1/P_i + 1/P_j - 1)}$$

881

882 The increase of either  $P_i$  or  $P_j$  will result in an increase of  $E_{ij}$  which suggests the Jaccard  
883 similarity between cells is highly affected by the read depth. **Such observation prompts us**  
884 **to develop an *ad hoc* normalization method to eliminate the read depth effect.**

885

886 To learn the relationship between the  $E_{ij}$  and  $J_{ij}$  from the data, we next fit a curve to  
887 predict the observed Jaccard coefficient  $J_{ij}$  as a function of its expected value  $E_{ij}$  by fitting  
888 a polynomials regression of degree 2 using R function `lm`. **Theoretically,  $E_{ij}$  should be**

889 linear with  $J_{ij}$  if cells are completely random, but in real dataset, we have observed a non-  
890 linearity between  $E_{ij}$  and  $J_{ij}$  especially among the high-coverage cells. We suspect, to  
891 some extent, the degree of randomness of fragment distribution in a single cell is  
892 associated with the coverage. To better model the non-linearity, we include a second order  
893 polynomial in our model:

894

$$895 \quad J_{ij} = \beta_0 + \beta_1 E_{ij} + \beta_2 E_{ij}^2$$

896

897 This fitting provided estimators of parameters  $\{\widehat{\beta}_0, \widehat{\beta}_1, \widehat{\beta}_2\}$ . As such, we next use it to  
898 normalize the observed Jaccard coefficient by:

899

$$900 \quad N_{ij} = J_{ij} / (\widehat{\beta}_0 + \widehat{\beta}_1 E_{ij} + \widehat{\beta}_2 E_{ij}^2)$$

901 The fitting of the linear regression, however, can be very time consuming with a large  
902 matrix. Here we test the possibility of performing this step on a random subset of  $y$  cells  
903 in lieu of the full matrix. When selecting a subset of  $y$  cells to speed up the first step, we  
904 do not select cells at random with a uniform sampling probability. Instead, we set the  
905 probability of selecting a cell  $i$  to

906

$$907 \quad \frac{1}{d(\log_{10}(C_i))}$$

908

909 where  $d$  is the density estimate of all  $\log_{10}$ -transformed cell fragment count and  $C_i$  is the  
910 number of fragments in cell  $i$  and  $C_i = \sum_k^m x_{ik}$ . Similar approach was first introduced in  
911 SCTransform<sup>51</sup> to speed up the normalization of single cell RNA-seq.

912

913 We then proceed to normalize the full Jaccard coefficient matrix  $J \in \mathcal{R}^{n \times n}$  using the  
914 regression model learned from  $y$  cells and compared the results to the case where all cells  
915 are used in the initial estimation step as well. We use the correlation of normalized  
916 Jaccard coefficient to compare this partial analysis to the full analysis. We observe that

917 using as few as 2000 cells in the estimation gave rise to virtually identical estimates. We  
918 therefore use 2,000 cells in the initial model-fitting step. To remove outliers in the  
919 normalized similarity, we use the 0.99 quantile to cap the maximum value of the  
920 normalized matrix.

921

922 Next, using normalized Jaccard coefficient matrix  $N$ , we next normalize the matrix by:

923

$$924 \quad A = D^{-1/2} N D^{-1/2}$$

925

926 where  $D \in \mathcal{R}^{n \times n}$  is a diagonal matrix which is composed as  $D_{i,i} = \sum_j N_{i,j}$ . We next perform  
927 eigenvector decomposition against  $A$ .

928

$$929 \quad A = U \Lambda U^T$$

930

931 The columns  $\varphi_i \in \mathcal{R}^n$  of  $U \in \mathcal{R}^{n \times n}$  are the eigenvectors. The diagonal matrix  $\Lambda \in \mathcal{R}^{n \times n}$   
932 has the eigenvalues  $\lambda_1 \geq \lambda_2 \geq \dots \geq 0$  in descending order as its entries. Finally, we report  
933 the first  $r$  eigenvectors as the final low-dimension manifold.

934

### 935 *Evaluation of Ad Hoc Normalization Method*

936 To assess the performance of normalization of SnapATAC we processed three datasets.  
937 As shown in **Supplementary Fig. 3**, before normalization, SnapATAC exhibits a strong  
938 gradient that is correlated with sequencing depth within the cluster (**Supplementary**  
939 **Fig. 3a**). Although the sequencing depth effect is still observed in some of the small  
940 clusters, it is clear that the normalization method has largely eliminated the read depth  
941 effect as compared to the unnormalized ones (**Supplementary Fig. 3b**).

942

943 To better quality the coverage bias, we next computed the Shannon entropy that estimates  
944 the “uniformness” of the distribution of cell coverage in the UMAP embedding space. In  
945 detail, we first chose the top 10% cells of the highest coverage as “high-coverage” cells.  
946 Second, in the 2D UMAP embedding space, we discretize “high-coverage” cells from a  
947 continuous random coordinate (umap1, umap2) into bins (n=50) and returns the

948 corresponding vector of counts. This is done using a function called “discretize2d” in the  
949 “entropy” R package. Third, we estimated the Shannon entropy of the random variable  
950 from the corresponding observed counts. This is done using function “entropy” in the  
951 “entropy” R package. A higher entropy indicates that the “high-coverage” cells are more  
952 uniformly distributed in the UMAP embedding space, overall suggesting a better  
953 normalization performance.

954  
955 We next examine another eight possible sources of biases by projecting to the UMAP  
956 embedding space, some metrics show cluster specificity for all three methods perhaps due  
957 to biological relevance, but all three methods can reveal significant biological  
958 heterogeneity without exhibiting substantial intra-cluster bias for any metrics examined  
959 (**Supplementary Fig. 4**).

960

#### 961 Removing batch effects using Harmony

962 When the technical variability is at a larger scale than the biological variability, we apply  
963 batch effect corrector - Harmony<sup>23</sup> - to eliminate such confounding factor. Given two  
964 datasets  $\mathbf{X} = \{\mathbf{X}^1, \mathbf{X}^2\}$  generated using different technologies, we first calculate the joint  
965 low-dimension manifold  $\mathbf{U} = \{\mathbf{U}^1, \mathbf{U}^2\}$  as described above. We next apply Harmony to  $\mathbf{U}$   
966 to regress out batch effect, resulting in a new harmonized embedding  $\mathbf{U}^H$ . This is  
967 implemented as a function “runHarmony” in SnapATAC package.

968

#### 969 Selection of Eigenvector and Eigenvalues

970 We next determine how many eigenvectors to include for the downstream analysis. Here  
971 we use an *ad hoc* approach for choosing the optimal number of components. We look at  
972 the scatter plot between every two pairs of eigenvectors and choose the number of  
973 eigenvectors that start exhibiting “blob”-like structure in which no obvious biological  
974 structure is revealed.

975

#### 976 Nyström Landmark-Extension

977 The computational cost of the dimensionality reduction scales quadratically with the  
978 increase of number of cells. For instance, calculating and normalizing the pair-wise kernel  
979 Matrix  $\mathbf{N}$  becomes computationally infeasible for large-scale dataset. To overcome this

980 limitation, here we combine the Nyström method<sup>19,52</sup> (a sampling technique) and **our**  
981 **dimensionality reduction method** to present Nyström landmark-extension method.

982

983 A Nyström landmark-extension algorithm includes three major steps: i) sampling  $\mathcal{O}(K)$ :  
984 sample a subset of  $K$  ( $K \ll N$ ) cells from  $N$  total cells as “landmarks”. Instead of random  
985 sampling, here we adopt a density-based sampling approach developed in SCTransform<sup>51</sup>  
986 to preserve the density distribution of the  $N$  original points; ii) embedding  $\mathcal{O}(K^2)$ :  
987 compute the low-dimension embedding for  $K$  landmarks; iii) extension  $\mathcal{O}(N - K)$ :  
988 project the remaining  $N - K$  cells onto the low-dimensional embedding as learned from  
989 the landmarks to create a joint embedding space for all cells.

990

991 This approach significantly reduces the computational complexity and memory usage  
992 given that  $K$  is considerably smaller than  $N$ . The out-of-sample extension (step iii) further  
993 enables projection of new single cell ATAC-seq datasets to the existing reference single  
994 cell atlas. This allows us to further develop a supervised approach to predict cell types of  
995 a new single cell ATAC-seq dataset based on an existing reference atlas.

996

997 A key aspect of this method is the procedure according to which cells are sampled as  
998 landmark cells, because different sampled landmark cells give different approximations  
999 of the original embedding using full matrix. Here we employ the density-based sampling  
1000 as described above which preserves the density distribution of the original points.

1001

1002 Let  $X \in \mathcal{R}^{n \times m}$  be a dataset with  $n$  cells and  $m$  variables (bins) and  $N \in \mathcal{R}^{n \times n}$  be a  
1003 symmetric kernel matrix calculated using normalized Jaccard coefficient. To avoid  
1004 calculating the pairwise kernel matrix and performing eigen-decomposition against a big  
1005 matrix  $N \in \mathcal{R}^{n \times n}$ , we first sample  $k$  ( $k \ll n$ ) landmarks without replacement. This breaks  
1006 down the original kernel matrix  $N \in \mathcal{R}^{n \times n}$  into four components.

1007

1008

$$N = \begin{pmatrix} N^{kk} & N^{kv} \\ N^{vk} & N^{vv} \end{pmatrix}$$

1009



1010 in which  $N^{kk} \in \mathcal{R}^{k \times k}$  is the pairwise kernel matrix between  $k$  landmarks and  $N^{vk} \in$   
1011  $\mathcal{R}^{(n-k) \times k}$  is the similarity matrix between  $(n - k)$  cells and  $k$  landmarks. Using  $N^{kk}$ , we  
1012 perform **dimensionality reduction** to obtain the  $r$ -rank manifold  $U^{kk} \in \mathcal{R}^{k \times r}$  as described  
1013 above.

1014  
1015 Using  $N^{vk}$  which estimates the similarity between  $n - k$  cells and  $k$  landmark cells, we  
1016 project the rest of  $n - k$  cells to the embedding previously obtained using  $k$  landmark:

1017

$$1018 \quad A^{vk} = (D^{vv})^{-\frac{1}{2}}(N^{vk})(D^{kk})^{-\frac{1}{2}}$$

1019

1020 where  $D^{vv} \in \mathcal{R}^{(n-k) \times (n-k)}$  is a diagonal matrix which is composed as  $D_{i,i}^{vk} = \sum_j N_{i,j}^{vk}$ . The  
1021 projected coordinates of the new points onto the  $r$ -dimensional intrinsic manifold defined by the  
1022 landmarks are then given by,

1023

1024

$$1025 \quad U^{vk} = A^{vk}U^{kk}/\Lambda^{kk}$$

1026

1027 The resulting  $U^{vk} \in \mathcal{R}^{(n-k) \times r}$  is the approximate  $r$ -rank low dimension representation of  
1028 the rest  $n - k$  cells. Combining  $U^{kk}$  and  $U^{vk}$  creates a joint embedding space for all cells:

1029

$$1030 \quad \tilde{U} = \begin{bmatrix} U^{kk} \\ U^{vk} \end{bmatrix}$$

1031

1032 In the approximate joint  $r$ -rank embedding space  $\tilde{U}$ , we next create a  $k$ -nearest neighbor  
1033 (KNN) graph in which every cell is represented as a node and edges are drawn between  
1034 cells within  $k$  nearest neighbors defined using Euclidean distance. Finally, we apply  
1035 community finding algorithm such as Louvain (implemented by igraph package in R) to  
1036 identify the ‘communities’ in the resulting graph which represents groups of cells sharing  
1037 similar profiles, potentially originating from the same cell type.

1038

1039 *Optimizing the Number of Landmarks*

1040 To evaluate the effect of the number of landmarks, we apply our method to a complex  
1041 dataset that contains over 80k cells from 13 different mouse tissues. We employ the  
1042 following three metrics to evaluate the performance. First, using different number of  
1043 landmarks (k) ranging from 1,000 to 10,000, we compare the clustering outcome to the  
1044 cell type label defined in the original study. The goal of this is to identify the “elbow” point  
1045 that performance drops abruptly. Second, for each sampling, we repeat for five times  
1046 using different set of landmarks to evaluate stability between sampling. Third, we spiked  
1047 in 1% Patski cells to assess the sensitivity of identifying rare cell types. We choose Patski  
1048 cells because these cells were profiled using the same protocol by the same group (Data  
1049 source listed in **Supplementary Table S1**) to minimize the batch effect.

1050

1051 We observe that using as few as 5,000 landmarks can largely recapitulate the result  
1052 obtained using 10,000 landmarks (**Supplementary Fig. 5a**), and 10,000 landmarks  
1053 can achieve highly robust embedding between sampling (**Supplementary Fig. 5b**) and  
1054 successfully recover spiked-in rare populations (**Supplementary Fig. 5c**). To obtain a  
1055 reliable low-dimensional embedding, we use 10,000 landmarks for all the analysis  
1056 performed in this study.

1057

### 1058 *Ensemble Nyström Method*

1059 Nyström method is stochastic in its nature, different sampling will result in different  
1060 embedding and clustering outcome. To improve the robustness of the clustering method,  
1061 we next employ Ensemble Nyström Algorithm which combines a mixture of Nyström  
1062 approximation to create an ensemble representation<sup>53</sup>. Supported by theoretical analysis,  
1063 this Ensemble approach has been demonstrated to guarantee a convergence and in a  
1064 faster rate in comparison to standard Nyström method<sup>53</sup>. Moreover, this ensemble  
1065 algorithm naturally fits within distributed computing environments, where their  
1066 computational costs are roughly the same as that of the standard Nyström single sampling  
1067 method.

1068

1069 We treat each approximation generated by the Nyström method using  $k$  landmarks as an  
1070 expert and combined  $p \geq 1$  such experts to derive an improved approximation, typically  
1071 more accurate than any of the original experts<sup>53</sup>.

1072

1073 The ensemble set-up is defined as follows. Given a dataset  $X \in \mathcal{R}^{n \times m}$  of  $n$  cells. Each  
1074 expert  $S_j$  receives  $k$  landmarks randomly selected from matrix  $X$  using density-based  
1075 sampling approach without replacement. Each expert  $S_r$ ,  $r \in [1, p]$  is then used to define  
1076 the low dimension embedding  $\tilde{U}_j \in \mathcal{R}^{n \times r}$  as described above. For each low-dimension  
1077 embedding  $\tilde{U}_j \in \mathcal{R}^{n \times r}$ , we create a KNN-graph as  $\tilde{G}_j$ . Thus, the general form of the  
1078 approximation,  $\tilde{G}^{en}$ , generated by the ensemble Nyström method is

1079

$$1080 \quad \tilde{G}^{en} = \sum_{j=1}^p \mu^j \tilde{G}^j$$

1081

1082 where  $\mu^j$  is the mixture weights that can be defined in many ways. Here we choose to use  
1083 the most straightforward method by assigning an equal weight to each of the KNN-graph  
1084 obtained from different samplings,  $\mu^j = 1/p, r \in [1, p]$ . While this choice ignores the  
1085 relative quality of each Nyström approximation, it is computational efficient and already  
1086 generates a solution superior to any one of the approximations used in the combination.  
1087 Using the ensemble weighted KNN graph  $\tilde{G}^{en}$ , we next apply community finding  
1088 algorithm to identify cell clusters. **By testing on the mouse atlas dataset<sup>8</sup>, we demonstrate**  
1089 **that the clustering stability of the ensemble approach is significantly higher than the**  
1090 **standard Nyström method (Supplementary Fig. 5d).**

1091

### 1092 Visualization

1093 We use the t-SNE implemented by FI-tsne, Rtsne or UMAP (umap\_0.2.0.0) to visualize  
1094 and explore the dataset.

1095

### 1096 Gene Accessibility Score

1097 To annotate the identified clusters, SnapATAC calculated the gene-body accessibility  
1098 matrix  $G$  using “calGmatFromMat” function in SnapATAC package where  $G_{ij}$  is the

1099 number of fragments overlapping with  $\mathbf{j}$ -th genes in  $\mathbf{i}$ -th cell.  $\mathbf{G}_{i,j}$  is then normalized to  
1100 CPM (count-per-million reads) as  $\tilde{\mathbf{G}}$ . The normalized accessibility score is then smoothed  
1101 using Markov affinity-graph based method:

1102

$$1103 \quad \hat{\mathbf{G}} = \tilde{\mathbf{G}} \mathbf{A}^t$$

1104

1105 where  $\mathbf{A}$  is the adjacent matrix obtained from K nearest neighbor graph and  $t$  is number  
1106 of steps taken for Markov diffusion process. We set  $t = 3$  in this study. **Please note that**  
1107 **the gene accessibility score is only used to guide the annotation of cell clusters identified**  
1108 **using cell-by-bin matrix. The clusters are identified using cell-by-bin matrix in prior.**

1109

#### 1110 Read Aggregation & Peak Calling

1111 After annotation, cells from the same cluster are pooled to create aggregated signal for  
1112 each of the identified cell types. This allows for identifying *cis*-elements from each cluster.  
1113 MACS2 (version 2.1.2) is used for generating signal tracks and peak calling with the  
1114 following parameters: --nomodel --shift 100 --ext 200 --qval 1e-2 -B -SPMR. This can be  
1115 done by “runMACS” function in SnapATAC package.

1116

#### 1117 Motif Analysis

1118 SnapATAC incorporates chromVAR<sup>14</sup> to estimate the motif variability and Homer<sup>21</sup> for *de*  
1119 *novo* motif discovery. This is implemented as function “runChromVAR” and “runHomer”  
1120 in SnapATAC package.

1121

#### 1122 Identification of differentially accessible peaks

1123 For a given group of cells  $C_i$ , we first look for their neighboring cells  $C_j$  ( $|C_i| = |C_j|$ ) in  
1124 the low-dimension manifold as “background” cells to compare to. If  $C_i$  accounts for  
1125 more than half of the total cells, we use the remaining cells as local background. Next,  
1126 we aggregate  $C_i$  and  $C_j$  to create two raw-count vectors as  $V_{C_i}$  and  $V_{C_j}$ . We then perform  
1127 differential analysis between  $V_{C_i}$  and  $V_{C_j}$  using exact test as implemented in R package  
1128 edgeR (v3.18.1) with BCV=0.1. P-value is then adjusted into False Discovery Rate (FDR)  
1129 using Benjamini-Hochberg correction. Peaks with FDR less than 0.01 are selected as

1130 significant DARs. However, the static significance is under powered for small  
1131 clusters.

1132

### 1133 *GREAT analysis*

1134 SnapATAC incorporates GREAT analysis<sup>39</sup> to infer the candidate biological pathway  
1135 active in each cell populations. This is implemented as function “runGREAT” SnapATAC  
1136 package.

1137

### 1138 **Integration with single cell RNA-seq**

1139 We use canonical correlation analysis (CCA) embedded in Seurat V3<sup>18</sup> to integrate  
1140 single cell RNA-seq and single cell ATAC-seq. We first calculate the gene accessibility  
1141 account at variable genes identified using single cell RNA-seq dataset. This can be done  
1142 using a function called “createGmatFromMat” in SnapATAC package. Next, SnapATAC  
1143 converts the snap object to a Seurat v3 object using a function called “SnapToSeurat”  
1144 in preparation for integration. Different from integration method in Seurat, we use the  
1145 our low-dimension manifold as the dimensionality reduction method in the Seurat  
1146 object. We next follow the vignette in Seurat website  
1147 ([https://satijalab.org/seurat/v3.0/atacseq\\_integration\\_vignette.html](https://satijalab.org/seurat/v3.0/atacseq_integration_vignette.html)) to integrate  
1148 these two modalities. The cell type for scATAC-seq is predicted using function  
1149 “TransferData” in Seurat V3.

1150

1151 Finally, for each single cell ATAC profile, we infer its gene expression profile by  
1152 calculating the weighted average expression profile of its nearest neighboring cells in  
1153 the single cell RNA-seq dataset<sup>18</sup>. By doing so, we create pseudo-cells that contain  
1154 information of both chromatin accessibility and gene expression profiles. The  
1155 imputation of gene expression profile is done by “TransferData” function in Seurat V3.

1156

### 1157 **Linking enhancers to putative target genes**

1158 Using the “pseudo” cells, we next sought to predict the putative target genes for regulatory  
1159 elements based on the association between expression of a gene and chromatin  
1160 accessibility at its **enhancer elements**. Given a gene **G**, we first identify its surrounding

1161 regulatory elements within 1MB window flanking  $G$ . Let  $Y^G$  be the imputed gene  
1162 expression value for gene  $G$  among  $n$  cells. We perform logistic regression using  $Y^G$  as  
1163 variable to predict the binary state for each of peaks surrounding  $G$ . The idea behind using  
1164 logistic regression is that if there is a relationship between the gene expression (continuous  
1165 variable) and chromatin accessibility (categorical variable), we should be able to predict  
1166 chromatin accessibility from the gene expression. Logistic regression does not make many  
1167 of the key assumptions such as normality of the continuous variables. In addition, since  
1168 we only have one variable (gene expression) for prediction every time, there is no problem  
1169 of multicollinearity.

1170

1171 We next fit logistic regression between each of flanking peak and gene expression using  
1172 “glm” function in R with binomial(link='logit') as the family function. By doing so, we  
1173 obtain the regression coefficient  $\beta_1$  and its corresponding P-value for each peak  
1174 separately. Here we used  $5e-8$ , a standard P-value cutoff for human genome-wide  
1175 association study to determine the significant association. While this cutoff is less sample  
1176 or gene specific compared to more complicated methods such as permutation test, it is  
1177 computational efficient and already generates a reasonable set of gene-enhancer pairings.

1178

1179 To evaluate the performance of our methods, we compare our prediction with cis-eQTL  
1180 derived from interferon- $\gamma$  and lipopolysaccharide stimulation of monocytes<sup>25</sup>. Significant  
1181 cis-eQTL associations are downloaded from supplementary material (Table S2) in Fairfax  
1182 (2014)<sup>25</sup>. We filter cis-eQTL based on two criteria: 1) only cis-eQTLs that overlap with the  
1183 peaks identified in PBMC dataset are considered; 2) In addition, we only keep the cis-  
1184 eQTLs whose genes overlap with the variable genes determined by scRNA-seq. This  
1185 filtering reduced the cis-eQTL list to 456 **candidates**.

1186

1187 Next, we estimate the association for each of cis-eQTLs by performing logistic regression  
1188 test as described above. To make a comparison, we derive a set of negative pairs matched  
1189 for the distance. **The negative control pairs for cis-eQTL are chosen in the following**  
1190 **manner to control for both distance and chromatin accessibility: for each positive eQTL**  
1191 **pair  $p_{ij}$  which connects gene  $i$  and enhancer  $j$  with a distance of  $d_{ij}$ , we look for the**

1192 enhancer  $k$  on the opposite direction of the gene  $i$  that minimizes  $|d_{ij} - d_{iz}|$ . By doing so,  
1193 the negative sets are controlled for distance, chromatin accessibility level and gene  
1194 expression level.

1195

### 1196 **Simulation of scATAC-seq datasets**

1197 First, we download the alignment files (bam files) for ten bulk ATAC-seq experiment from  
1198 ENCODE (data source listed in **Supplementary Table S2**). From each bam file, we  
1199 simulate 1,000 single cell ATAC-seq datasets by randomly down sampling to a variety of  
1200 coverages ranging from 1,000 to 10,000 reads per cells. We next create a cell-by-bin  
1201 matrix of 5kb which is used for SnapATAC clustering. Merging peaks identified from each  
1202 bulk experiment, we create cell-by-peak matrix used for LSA, Cis-Topic, Cicero and  
1203 chromVAR for clustering. We repeat the sampling for  $n=10$  times to estimate the  
1204 variability of the clustering.

1205

### 1206 **Comparison of scalability**

1207 To compare the scalability between SnapATAC to other methods, we next simulate  
1208 multiple datasets of different number of cells ranging from 20k to 1M. We simulate these  
1209 datasets in the following manner. Using the 80k mouse atlas dataset, we randomly sample  
1210 this dataset to different number of cells ranging from 20k to 1M cells. For the sampling  
1211 that has cells more than 80K, we sample with replacement and introduce perturbation to  
1212 each cell by randomly removing 1% of the “1”s in each of the cells. This removes the  
1213 duplicate cells and largely maintains the density of the matrix.

1214

1215 For each sampling, we then perform dimensionality reduction using LSA and cisTopic  
1216 and compare their CPU running time. Specifically, we monitor the running time for 1) TF-  
1217 IDF transformation and Singular Value Decomposition (SVD) for LSA, 2) function  
1218 “runModels” with topics = c(2, 5, 10, 15, 20, 25, 30, 35, 40) and “selectModel” function in  
1219 cisTopic. The time for matrix loading is not counted.

1220

1221 All the comparisons were tested on a machine with 5 AMD Operon (TM) Processor 6276  
1222 CPUs.

## 1223 **Doublets Detection Using Scrublet**

1224 To identify doublets from secondary motor cortex single nucleus ATAC-seq datasets, we  
1225 use single cell RNA-seq doublets detection algorithm Scrublet<sup>37</sup>. Briefly, Scrublet  
1226 identifies doublets in the following manner: 1) Scrublet performs normalization, gene  
1227 filtering, and principal components analysis (PCA) to project the high-dimension data to  
1228 a low-dimension space; 2) Scrublet simulates doublets by adding the unnormalized  
1229 counts from randomly sampled observed transcriptomes; 3) the simulated doublets are  
1230 projected to the low dimension embedding computed in step 1. The more neighbors of a  
1231 cell are the simulated doublets, the more likely this cell is a “doublet”. Based on this idea,  
1232 a KNN classifier was then used to estimate the doublet score for each cell.

1233  
1234 Since Scrublet was designed for detecting doublets in single cell RNA-seq, it is unclear  
1235 whether it can be used for single cell ATAC-seq. To examine this, we applied Scrublet to  
1236 a single cell ATAC-seq dataset of mixed human and mouse cells where the “ground-truth”  
1237 doublets can be identified based on the alignment ratio to human and mouse genome.  
1238 Compared to the ground truth, Scrublet can identify over 90% of the doublets in this  
1239 dataset with ~90% accuracy (**Supplementary Fig. 26**). This result suggests that  
1240 although Scrublet was not developed for detecting doublets in single cell ATAC-seq, it can  
1241 find the doublets in scATAC-seq dataset with reasonable accuracy and sensitivity.

1242

## 1243 **Projection of single cell ATAC-seq datasets to reference atlas**

1244 We reason that landmark-extension algorithm can also be extended to project new single  
1245 cell ATAC-seq datasets to a reference atlas. Given a query dataset  $\mathbf{Y} \in \mathcal{R}^{l \times m}$  that contains  
1246  $l$  query cells with  $m$  bins and a reference dataset  $\mathbf{X} \in \mathcal{R}^{n \times m}$  with  $n$  reference cells of  $m$   
1247 bins. We first randomly sample  $k=10,000$  landmarks from  $\mathbf{X}$  using density-based  
1248 sampling as described above. Next, we compute the pairwise similarity using normalized  
1249 jaccard coefficient for  $k$  landmarks as  $\mathbf{N}^{kk} \in \mathcal{R}^{k \times k}$  and obtain the low-dimension  
1250 manifold  $\mathbf{U}^k \in \mathcal{R}^{k \times r}$ . We then compute  $\mathbf{N}^{lk} \in \mathcal{R}^{l \times k}$  which estimates the similarity  
1251 between  $l$  query cells and  $k$  landmark cells, and then project the  $l$  query cells to the  
1252 embedding pre-computed for  $k$  landmark cells as following:

1253



1254 
$$A^l = (D^l)^{-\frac{1}{2}}(U^k)(D^k)^{-\frac{1}{2}}$$

1255

1256 where  $D^l \in \mathcal{R}^{l \times l}$  is a diagonal matrix which is composed as  $D^l_{i,i} = \sum_j N^l_{i,j}$  and  $D^k \in \mathcal{R}^{k \times k}$

1257 is a diagonal matrix which is composed as  $D^k_{i,i} = \sum_j N^k_{i,j}$

1258

1259 
$$U^l = A^l U^k / \Lambda^k$$

1260

1261 The resulting  $U^l \in \mathcal{R}^{l \times r}$  is the predicted low-dimension manifold for  $l$  query cells.

1262

1263 In the joint embedding space  $[U^k, U^l]$ , we next identify the mutual nearest neighbors  
1264 between query and landmark cells. For each cell  $i_1 \in \mathbf{X}^k$  belonging to the landmarks, we  
1265 find the ***k*.nearest (5)** cells in the query dataset with the smallest distances to  $i_1$ . We do  
1266 the same for each cell in query cell dataset to find its ***k*.nearest (5)** neighbors in the  
1267 landmark dataset. If a pair of cells from each dataset is contained in each other's nearest  
1268 neighbors, those cells are considered to be mutual nearest neighbors or MNN pairs (or  
1269 “anchors”). We interpret these pairs as containing cells that belong to the same cell type  
1270 or state despite being generated in both landmark and query cells. Thus, any differences  
1271 between cells in MNN pairs should theoretically represent the non-overlapping cell types.  
1272 Here we removed any query cells that failed to identify an MNN pair correspondence in  
1273 the reference dataset.

1274

1275 To make a classification of the remaining query cells according to the reference dataset,  
1276 we next apply the neighborhood-based classifier and wish to highlight the pioneering  
1277 work by Seurat V3<sup>18</sup>. First, we score each anchor (or MNN pair) using shared nearest  
1278 neighbor (SNN) graph by examining the consistency of edges between cells in the same  
1279 local neighborhood as described in the original study<sup>18</sup>. Second, we define a weight matrix  
1280 that estimates the strength of association between each query cell  $c$ , and each landmark  
1281  $i$ . For each query cell  $c$ , we identify the nearest  $s$  landmarks in the reference dataset in the  
1282 joint embedding space. Nearest anchors are then weighted based on their distance to the

1283 cell  $c$  over the distance to the  $s$ -th anchor cell. For each cell  $c$  and anchor  $i$ , we compute  
1284 the weighted similarities as:

1285

$$1286 \quad D_{c,i} = \left(1 - \frac{\text{dist}(c, a_i)}{\text{dist}(c, a_s)}\right) S_{ai}$$

1287

1288 Where  $\text{dist}(c, i)$  is the Euclidean distance in the joint embedding space and  $S_{ai}$  is the  
1289 weight for the corresponding MNN pair (anchor). We then normalize the similarity using  
1290 exponential function:

1291

$$1292 \quad \widetilde{D}_{c,i} = 1 - e^{\frac{-D_{c,i}}{\left(\frac{2}{sd}\right)^2}}$$

1293

1294 where  $sd$  is set to 1 by default. Finally, we normalize across all  $s$  anchors:

1295

$$1296 \quad W_{c,i} = \frac{\widetilde{D}_{c,i}}{\sum_1^{j=s} \widetilde{D}_{c,j}}$$

1297 Here we set  $s = 50$ . Please note that the similarity to cells beyond the  $s^{\text{th}}$  anchor neighbor  
1298 is set to be zero.

1299

1300 Let  $L \in \mathcal{R}^{k \times t}$  be the binary label matrix for  $k$  landmarks with  $t$  clusters.  $L_{i,j} = 1$  indicates  
1301 the class label for  $i$ -th landmark cell is  $j$ -th cluster. The row sum of  $L$  must be 1,  
1302 suggesting each landmark cell can only be assigned to one cluster label. We then compute  
1303 label predictions for query cells as  $P^l$ :

1304

$$1305 \quad P^l = WL$$

1306

1307 The resulting  $P^l$  is a probability matrix within 0 and 1,  $P^l_{i,j}$  indicates the probability of a  
1308 cell  $i$  belong to  $j$  cluster. Similarly, we infer the t-SNE position of query cells by replacing  
1309  $L$  with t-SNE coordinates of reference points. It is important to note that the distance

1310 between cells in the inferred t-SNE coordinate does not necessarily reflect the cell-to-cell  
1311 relationship.

1312

### 1313 **Tissue collection & nuclei isolation**

1314 Adult C57BL/6J male mice were purchased from Jackson Laboratories. Brains were  
1315 extracted from P56-63 old mice and immediately sectioned into 0.6 mm coronal sections,  
1316 starting at the frontal pole, in ice-cold dissection media. The secondary motor cortex  
1317 (MOs) region was dissected from the first three slices along the anterior-posterior axis  
1318 according to the Allen Brain reference Atlas (<http://mouse.brain-map.org/>, see  
1319 **Supplementary Fig. 15a** for depiction of posterior view of each coronal slice; dashed  
1320 line highlights the MOs regions on each slice). Slices were kept in ice-cold dissection  
1321 media during dissection and immediately frozen in dry ice for posterior pooling and  
1322 nuclei production. For nuclei isolation, the MOs dissected regions from 15-23 animals  
1323 were pooled, and two biological **replicates** were processed for each slice. Nuclei were  
1324 isolated as described in previous studies<sup>54,55</sup>, except no sucrose gradient purification was  
1325 performed. Flow cytometry analysis of brain nuclei was performed as described in Luo et  
1326 al<sup>54</sup>.

1327

### 1328 **Tn5 transposase purification & loading**

1329 Tn5 transposase was expressed as an intein chitin-binding domain fusion and purified  
1330 using an improved version of the method first described by Picelli et al<sup>56</sup>. T7 Express  
1331 lysY/I (C3013I, NEB) cells were transformed with the plasmid pTXB1-ecTn5 E54K L372P  
1332 (#60240, Addgene)<sup>56</sup>. An LB Ampicillin culture was inoculated with three colonies and  
1333 grown overnight at 37°C. The starter culture was diluted to an OD of 0.02 with fresh  
1334 media and shaken at 37°C until it reached an OD of 0.9. The culture was then immediately  
1335 chilled on ice to 10°C and expression was induced by adding 250 µM IPTG (Dioxane Free,  
1336 CI8280-13, Denville Scientific). The culture was shaken for 4 hours at 23°C after which  
1337 cells were harvested in 2 L batches by centrifugation, flash frozen in liquid nitrogen and  
1338 stored at -80°C. Cell pellets were resuspended in 20 ml of ice cold lysis buffer (20 mM  
1339 HEPES 7.2-KOH, 0.8 M NaCl, 1 mM EDTA, 10% Glycerol, 0.2% Triton X-100) with  
1340 protease inhibitors (Complete, EDTA-free Protease Inhibitor Cocktail Tablets,  
1341 11873580001, Roche Diagnostics) and passed three times through a Microfluidizer (lining

1342 covered with ice water, Model 110L, Microfluidics) with a 5 minute cool down interval in  
1343 between each pass. Any remaining sample was purged from the Microfluidizer with an  
1344 additional 25 ml of ice-cold lysis buffer with protease inhibitors (total lysate volume  
1345 ~50ml). Samples were spun down for 20 min in an ultracentrifuge at 40K rpm (L-80XP,  
1346 45 Ti Rotor, Beckman Coulter) at 4°C. ~45 ml of supernatant was combined with 115 ml  
1347 ice cold lysis buffer with protease inhibitors in a cold beaker (total volume = 160 ml) and  
1348 stirred at 4°C. 4.2ml of 10% neutralized polyethyleneimine-HCl (pH 7.0) was then added  
1349 dropwise. Samples were spun down again for 20 min in an ultracentrifuge at 40K rpm (L-  
1350 80XP, 45 Ti Rotor, Beckman Coulter) at 4°C. The pooled supernatant was loaded onto  
1351 ~10ml of fresh Chitin resin (S6651L, NEB) in a chromatography column (Econo-Column  
1352 (1.5 × 15 cm), Flow Adapter: 7380015, Bio-Rad). The column was then washed with 50-  
1353 100 ml lysis buffer. Cleavage of the fusion protein was initiated by flowing ~20ml of  
1354 freshly made elution buffer (20 mM HEPES 7.2-KOH, 0.5 M NaCl, 1 mM EDTA, 10%  
1355 glycerol, 0.02% Triton X-100, 100mM DTT) onto the column at a speed of 0.8ml/min for  
1356 25 min. After the column was incubated for 63 hrs at 4°C, the protein was recovered from  
1357 the initial elution volume and a subsequent 30 ml wash with elution buffer. Protein-  
1358 containing fractions were pooled and diluted 1:1 with buffer [20 mM HEPES 7.2-KOH, 1  
1359 mM EDTA, 10% glycerol, 0.5mM TCEP) to reduce the NaCl concentration to 250mM. For  
1360 cation exchange, the sample was loaded onto a 1ml column HiTrap S HP (17115101, GE),  
1361 washed with Buffer A (10mM Tris 7.5, 280 mM NaCl, 10% glycerol, 0.5mM TCEP) and  
1362 then eluted using a gradient formed using Buffer A and Buffer B (10mM Tris 7.5, 1M NaCl,  
1363 10% glycerol, 0.5mM TCEP) (0% Buffer B over 5 column volumes, 0-100% Buffer B over  
1364 50 column volumes, 100% Buffer B over 10 column volumes). Next, the protein-  
1365 containing fractions were combined, concentrated via ultrafiltration to ~1.5 mg/mL and  
1366 further purified via gel filtration (HiLoad 16/600 Superdex 75 pg column (28989333,  
1367 GE)) in Buffer GF (100mM HEPES-KOH at pH 7.2, 0.5 M NaCl, 0.2 mM EDTA, 2mM  
1368 DTT, 20% glycerol). The purest Tn5 transposase-containing fractions were pooled and 1  
1369 volume 100% glycerol was added to the preparation. Tn5 transposase was stored at -20°C.  
1370  
1371 To generate Tn5 transposomes for combinatorial barcoding assisted single nuclei  
1372 ATAC-seq, barcoded oligos were first annealed to pMENTs oligos (95 °C for 5 min,  
1373 cooled to 14 °C at a cooling rate of 0.1 °C/s) separately. Next, 1 µl barcoded transposon

1374 (50  $\mu$ M) was mixed with 7  $\mu$ l Tn5 ( $\sim$ 7  $\mu$ M). The mixture was incubated on the lab bench  
1375 at room temperature for 30 min. Finally, T5 and T7 transposomes were mixed in a 1:1  
1376 ratio and diluted 1:10 with dilution buffer (50 % Glycerol, 50 mM Tris-HCl (pH=7.5),  
1377 100 mM NaCl, 0.1 mM EDTA, 0.1 % Triton X-100, 1 mM DTT). For combinatorial  
1378 barcoding, we used eight different T5 transposomes and 12 distinct T7 transposomes,  
1379 which eventually resulted in 96 Tn5 barcode combinations per sample<sup>7</sup>  
1380 (**Supplementary Table S6**).

1381

### 1382 **Bulk ATAC-seq data generation**

1383 ATAC-seq was performed on 30,000-50,000 nuclei as described previously with  
1384 modifications<sup>3</sup>. Nuclei were thawed on ice and pelleted for 5 min at 500 x g at 4 °C. Nuclei  
1385 pellets were resuspended in 30  $\mu$ l tagmentation buffer (36.3 mM Tris-acetate (pH = 7.8),  
1386 72.6 mM K-acetate, 11 mM Mg-acetate, 17.6 % DMF) and counted on a hemocytometer.  
1387 30,000-50,000 nuclei were used for tagmentation and the reaction volume was adjusted  
1388 to 19  $\mu$ l using tagmentation buffer. After addition of 1  $\mu$ l TDE1 (Illumina FC-121-1030),  
1389 tagmentation was performed at 37°C for 60 min with shaking (500 rpm). Tagmented  
1390 DNA was purified using MinElute columns (Qiagen), PCR-amplified for 8 cycles with  
1391 NEBNext® High-Fidelity 2X PCR Master Mix (NEB, 72°C 5 min, 98°C 30 s, [98°C 10 s,  
1392 63°C 30 s, 72°C 60 s] x 8 cycles, 12°C held). Amplified libraries were purified using  
1393 MinElute columns (Qiagen) and SPRI Beads (Beckmann Coulter). Sequencing was  
1394 carried out on a NextSeq500 using a 150-cycle kit (75 bp PE, Illumina).

1395

### 1396 **Bulk ATAC-seq data analysis**

1397 ATAC-seq reads were mapped to reference genome mm10 using BWA and *samtools*  
1398 version 1.2 to eliminate PCR duplicates and mitochondrial reads. The paired-end read  
1399 ends were converted to fragments. Using fragments, MACS2<sup>57</sup> version 2.1.2 was used for  
1400 generating signal tracks and peak calling with the following parameters: --nomodel --shift  
1401 100 --ext 200 --qval 1e-2 -B -SPMR. Library quality control for bulk ATAC-seq can be  
1402 found in **Supplementary Table S7**.

1403

### 1404 **Single-nucleus ATAC-seq data generation**

1405 Combinatorial ATAC-seq was performed as described previously with modifications<sup>5,7</sup>.  
1406 For each sample two biological replicates were processed. Nuclei were pelleted with a  
1407 swinging bucket centrifuge (500 x g, 5 min, 4°C; 5920R, Eppendorf). Nuclei pellets were  
1408 resuspended in 1 ml nuclei permeabilization buffer (5 % BSA, 0.2 % IGEPAL-CA630, 1mM  
1409 DTT and cOmplete<sup>TM</sup>, EDTA-free protease inhibitor cocktail (Roche) in PBS) and  
1410 pelleted again (500 x g, 5 min, 4°C; 5920R, Eppendorf). Nuclei were resuspended in  
1411 500 µL high salt tagmentation buffer (36.3 mM Tris-acetate (pH = 7.8), 72.6 mM  
1412 potassium-acetate, 11 mM Mg-acetate, 17.6% DMF) and counted using a hemocytometer.  
1413 Concentration was adjusted to 4500 nuclei/9 µl, and 4,500 nuclei were dispensed into  
1414 each well of a 96-well plate. Glycerol was added to the leftover nuclei suspension for a  
1415 final concentration of 25 % and nuclei were stored at -80°C. For tagmentation, 1 µL  
1416 barcoded Tn5 transposomes<sup>7,56</sup> (**Supplementary Table S6**) were added using a  
1417 BenchSmart<sup>TM</sup> 96 (Mettler Toledo), mixed five times and incubated for 60 min at 37 °C  
1418 with shaking (500 rpm). To inhibit the Tn5 reaction, 10 µL of 40 mM EDTA were added  
1419 to each well with a BenchSmart<sup>TM</sup> 96 (Mettler Toledo) and the plate was incubated at 37  
1420 °C for 15 min with shaking (500 rpm). Next, 20 µL 2 x sort buffer (2 % BSA, 2 mM EDTA  
1421 in PBS) were added using a BenchSmart<sup>TM</sup> 96 (Mettler Toledo). All wells were combined  
1422 into a FACS tube and stained with 3 µM Draq7 (Cell Signaling). Using a SH800 (Sony),  
1423 20 nuclei were sorted per well into eight 96-well plates (total of 768 wells) containing  
1424 10.5 µL EB (25 pmol primer i7, 25 pmol primer i5, 200 ng BSA (Sigma))<sup>7</sup>. Preparation of  
1425 sort plates and all downstream pipetting steps were performed on a Biomek i7 Automated  
1426 Workstation (Beckman Coulter). After addition of 1 µL 0.2% SDS, samples were  
1427 incubated at 55 °C for 7 min with shaking (500 rpm). We added 1 µL 12.5% Triton-X to  
1428 each well to quench the SDS and 12.5 µL NEBNext High-Fidelity 2× PCR Master Mix  
1429 (NEB). Samples were PCR-amplified (72 °C 5 min, 98 °C 30 s, (98 °C 10 s, 63 °C 30 s, 72  
1430 °C 60 s) × 12 cycles, held at 12 °C). After PCR, all wells were combined. Libraries were  
1431 purified according to the MinElute PCR Purification Kit manual (Qiagen) using a vacuum  
1432 manifold (QIAvac 24 plus, Qiagen) and size selection was performed with SPRI Beads  
1433 (Beckmann Coulter, 0.55x and 1.5x). Libraries were purified one more time with SPRI  
1434 Beads (Beckmann Coulter, 1.5x). Libraries were quantified using a Qubit fluorimeter (Life  
1435 technologies) and the nucleosomal pattern was verified using a Tapestation (High

1436 Sensitivity D1000, Agilent). The library was sequenced on a HiSeq2500 sequencer  
1437 (Illumina) using custom sequencing primers, 25% spike-in library and following read  
1438 lengths: 50 + 43 + 40 + 50 (Read1 + Index1 + Index2 + Read2)<sup>7</sup>.

1439

1440

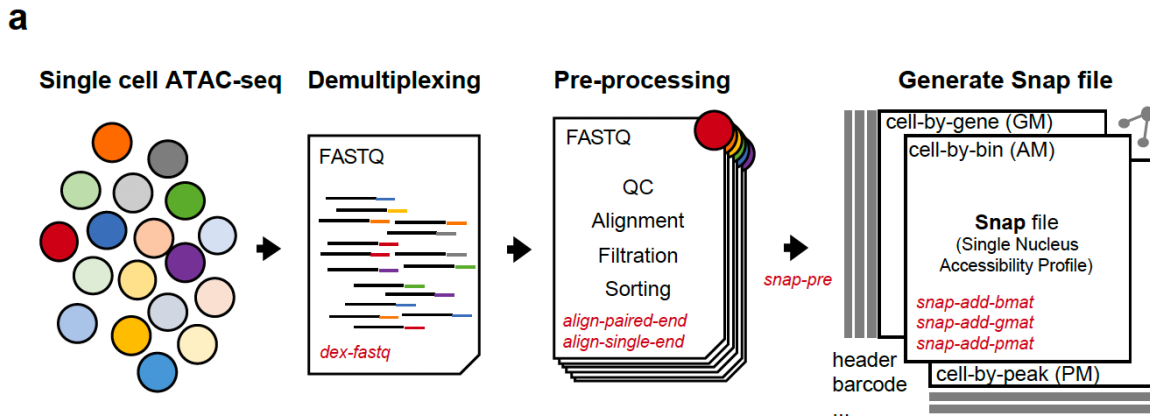

1441

1442

1443 **Figure S1. Overview of SnapTools workflow.** (a) Demultiplexing: SnapTools first  
1444 demultiplexed the fastq files by adding the cell barcodes to the beginning of each read  
1445 name; Pre-processing: raw sequencing reads were aligned to the reference genome using  
1446 BWA followed by filtration of erroneous alignments. A snap file was generated to store  
1447 indexed reads and multiple cell matrices including cell-by-peak, cell-by-gene and cell-by-  
1448 bin matrix.

1449



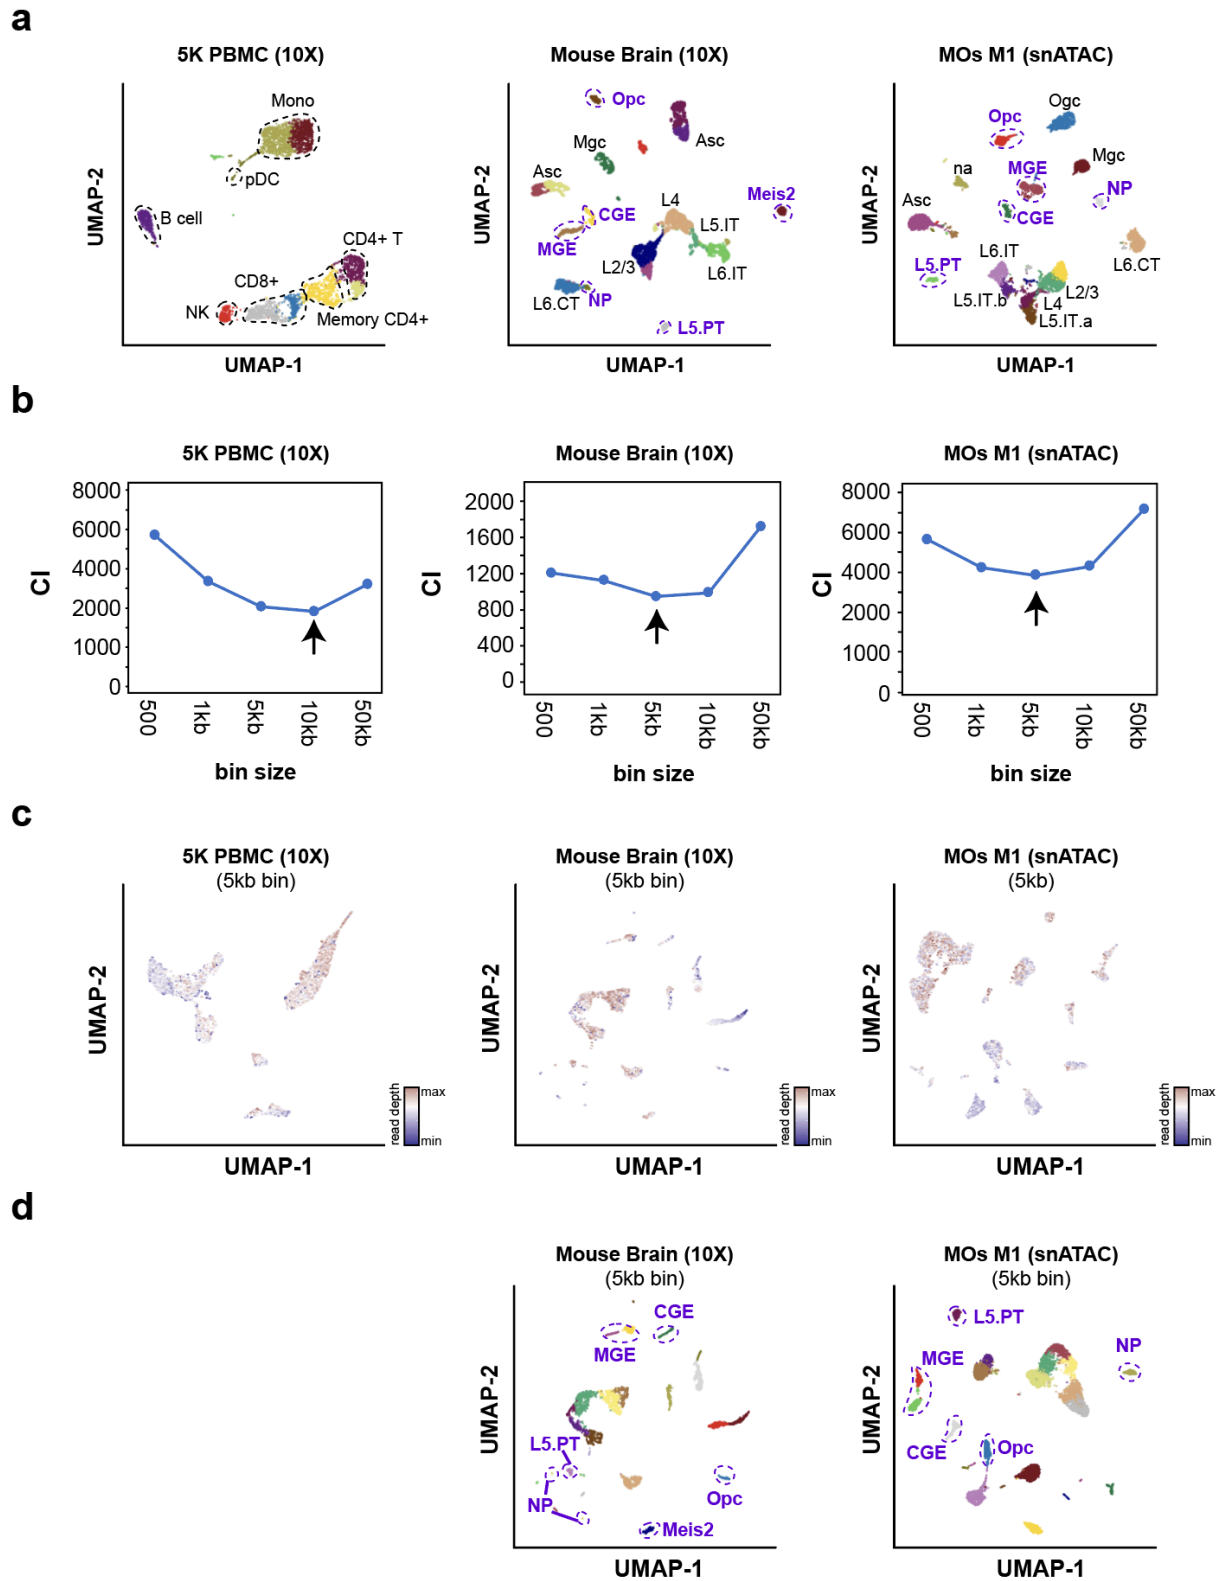

1451 **Figure S2. Choosing the optimal bin size.** (a) UMAP visualization of landmark cell  
1452 types identified in three benchmarking datasets. UMAP embedding was computed using  
1453 cisTopic and cell types were manually annotated based on the gene accessibility score at  
1454 canonical marker genes (**Supplementary Methods**). Blue dash line highlights the rare  
1455 cell populations that account for less than 2% of the total population. (b) Relationship  
1456 between connectivity index (CI) and bin sizes. Connectivity index were calculated  
1457 between landmark cell types in the reduced **dimension** using function “connectivity” in R  
1458 package “clv”. A lower CI indicates a better separation of landmark cell types. (c) UMAP  
1459 representation of three benchmarking datasets generated using SnapATAC using 5kb bin  
1460 size. Cells colored by read depth to illustrate the sequencing depth effect. (d) Cells are  
1461 colored by cluster labels identified by SnapATAC. Data source are listed in  
1462 **Supplementary Table S1**. Note that blue circles highlight rare cell populations account  
1463 for less than 2% of total population.

1464

1465

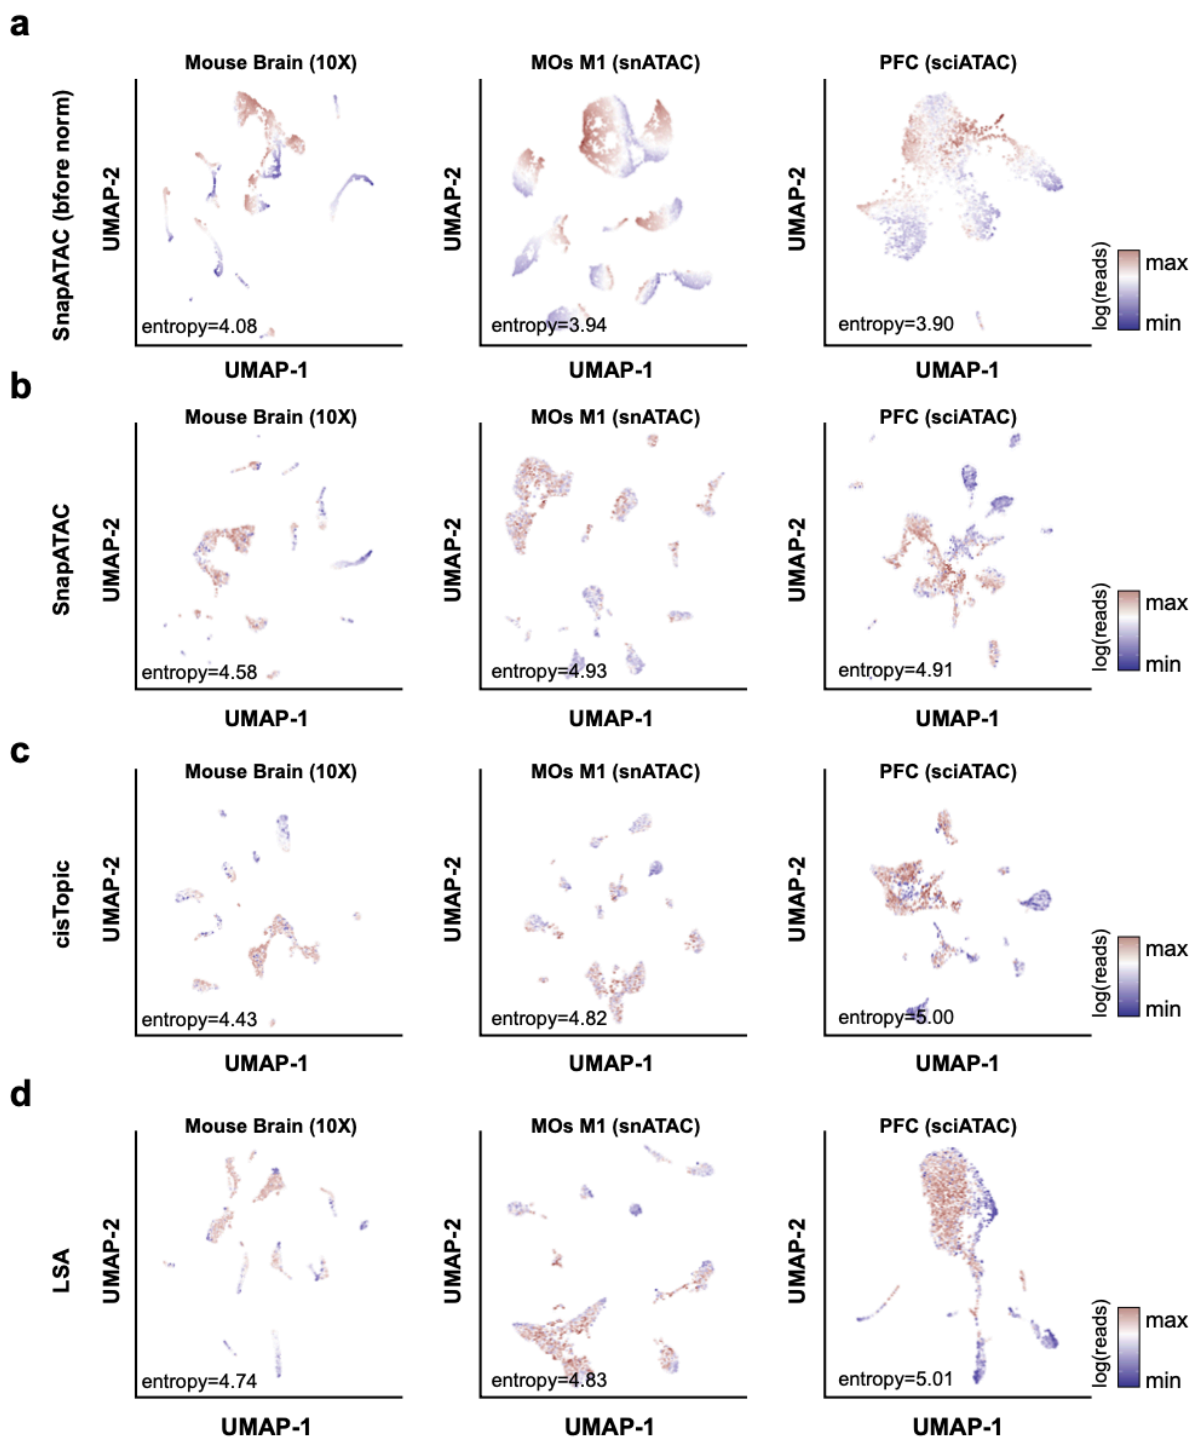

1466

1467

1468

1469

1470

1471 **Figure S3. SnapATAC is robust to sequencing depth.** Two dimensional UMAP  
1472 representation of three benchmarking datasets analyzed by four methods **(a)** SnapATAC  
1473 without normalization; **(b)** SnapATAC with normalization; **(c)** cisTopic and **(d)** Latent  
1474 Sematic Analysis (LSA). Cells are color by log-scaled read depth. **Read depth bias is**  
1475 **quantified by entropy as described in the **Supplementary Methods**.** Data source is  
1476 listed in **Supplementary Table S1**.

1477

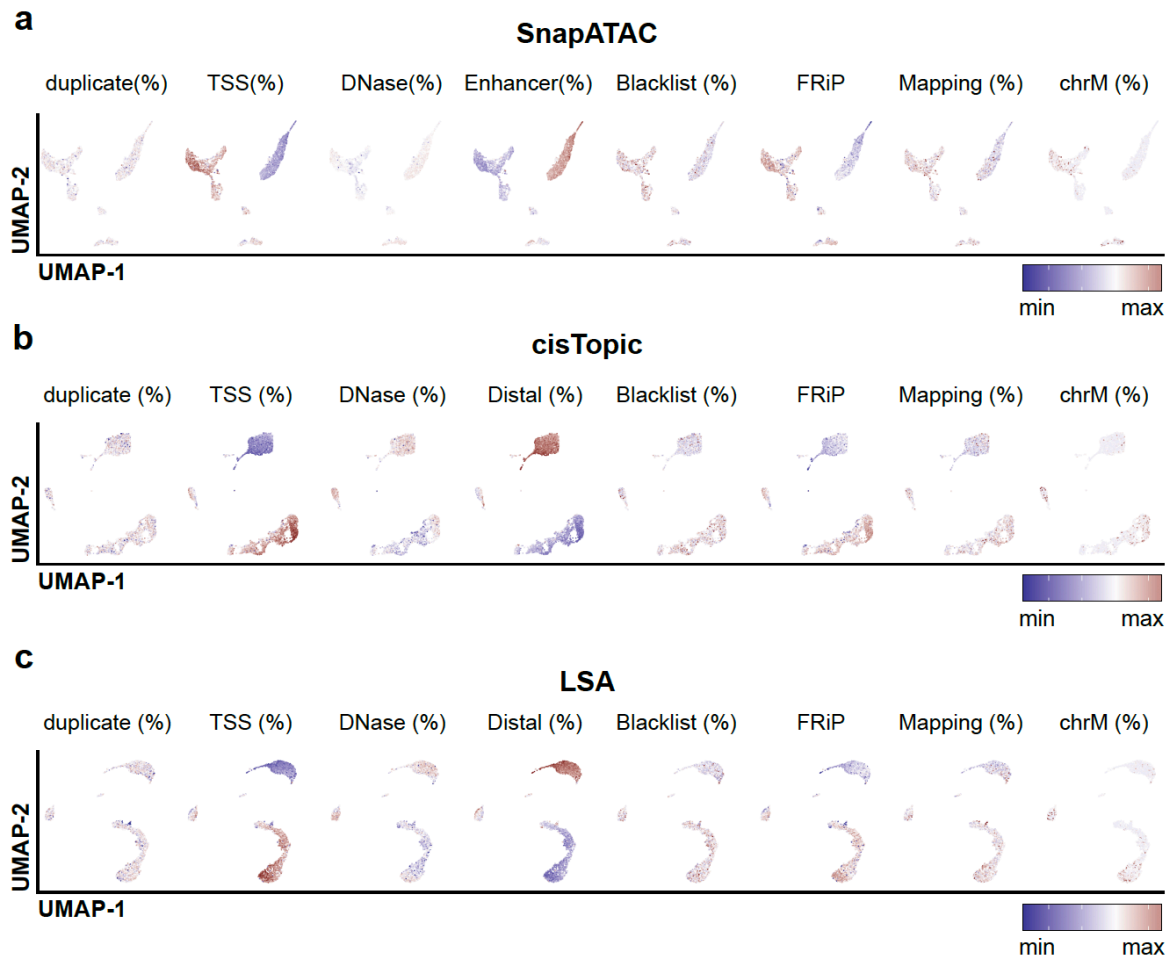

1478  
1479  
1480  
1481  
1482  
1483  
1484  
1485  
1486  
1487  
1488  
1489  
1490

**Figure S4. SnapATAC is robust to other biases.** Potential bias in single cell ATAC-seq dataset projected onto the UMAP visualization generated using different analysis methods **(a)** SnapATAC **(b)** cisTopic and **(c)** LSA. Duplicate: percentage of fragments that are PCR duplicates. TSS: percentage of fragments overlapping or are within 1kb of a TSS. TSS position is based on the GENECODE V28 (Ensemble 92). DNase: the percentage of fragments overlapping a master DNase peak list. The DNase peak list is created by combining all ENCODE<sup>1</sup> DNase peaks from hg19. Blacklist: the percentage of fragments overlapping with the ENCODE blacklist. FRiP: the percentage of fragments overlapping with the peaks defined from the aggregate signal. Mapping: the percentage of fragments that are uniquely mapped. chrM: the percentage of fragments mapped to mitochondria DNA. Dataset used in this plot is 5k PBMC (10X) as listed in **Supplementary Table S1**.

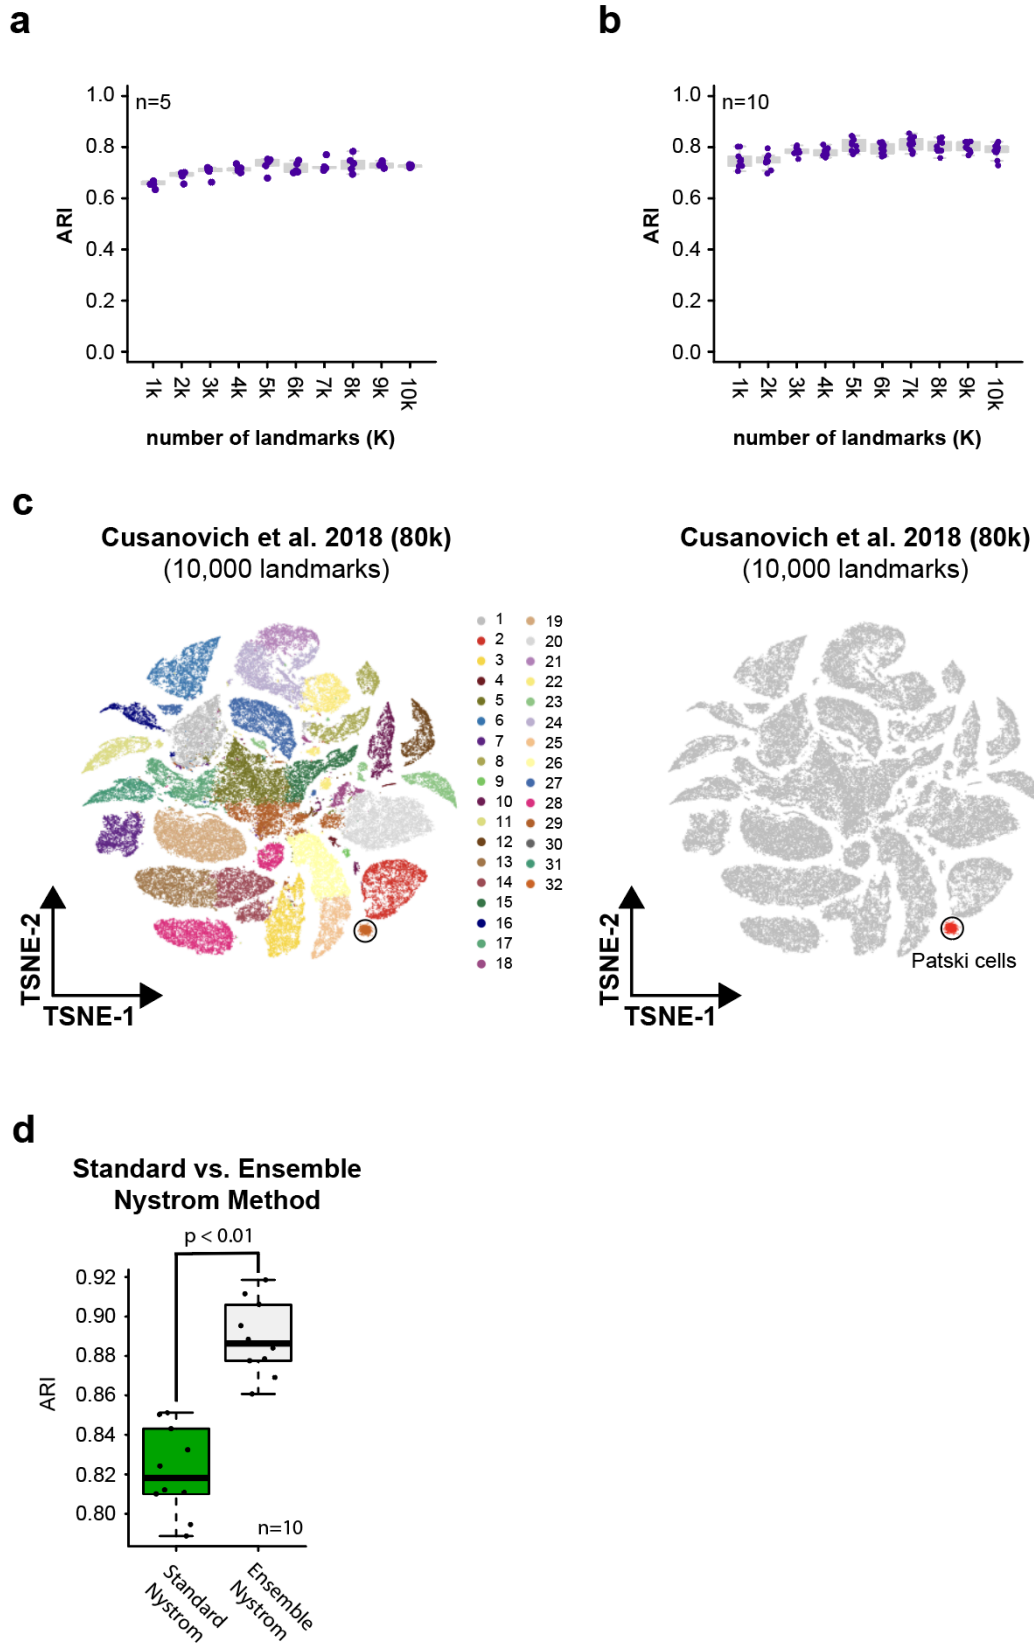

1492 **Figure S5. Ensemble Nystrom sampling improves the scalability and stability**  
1493 **without sacrificing the performance. (a)** A line plot comparing the performance of  
1494 clustering using various sampling parameters. The performance is evaluated using  
1495 Adjusted Rank Index (ARI). SnapATAC was applied to the mouse atlas dataset that  
1496 contained over 80k cells using different number of landmark cells ( $k$ ) ranging from 1k to  
1497 10k. For each  $k$ , we performed clustering for  $n=5$  times using different sets of randomly  
1498 selected landmarks. **(b)** A line plot comparing the stability of clustering results between  
1499 five samplings (pairwise comparison  $n=10$ ). **(c)** To evaluate the sensitivity of identifying  
1500 rare cell types, we spiked in 1% mouse Pastki cells generated using the same protocol in  
1501 Cusanovich 2015<sup>5</sup> and this rare cell population was recapitulated using 10,000 landmarks  
1502 (right). **(d)** To compare the clustering reproducibility between standard and ensemble  
1503 Nystrom sampling method, we performed clustering using both methods on Cusanovich  
1504 2018<sup>8</sup> for five times with different randomly selected landmark cells. The clustering  
1505 reproducibility quantified by ARI (adjusted rank index) between random trails is  
1506 significantly higher for the ensemble Nystrom method than the standard Nystrom  
1507 method (two-tailed t-test  $P < 0.01$ ).  
1508

1509

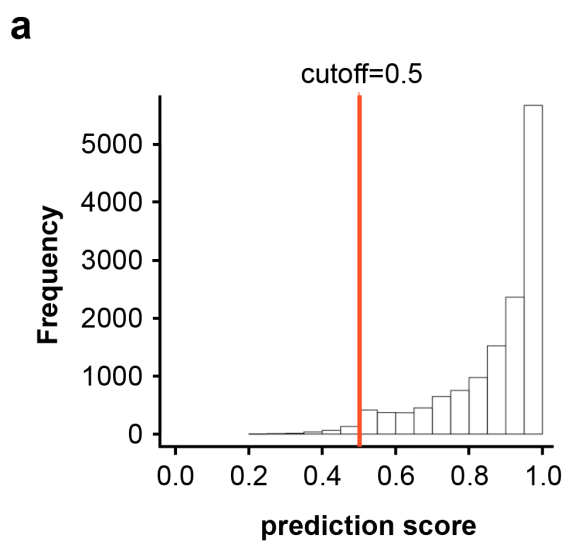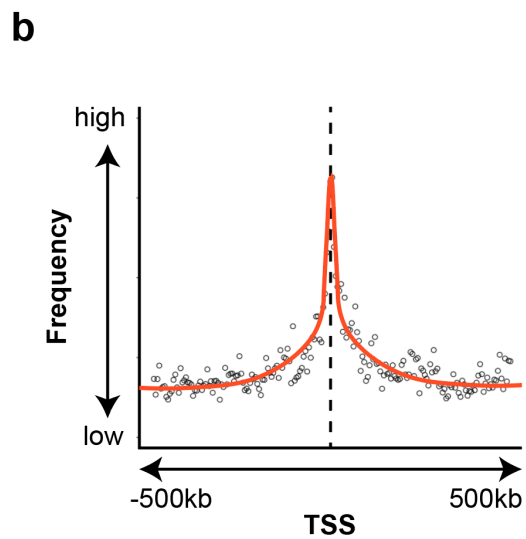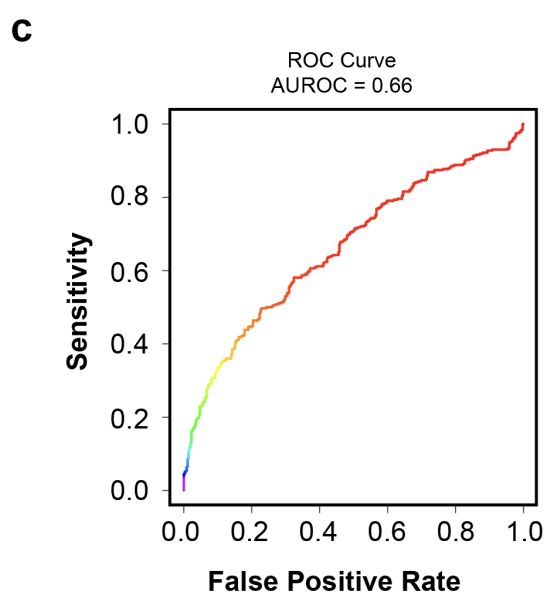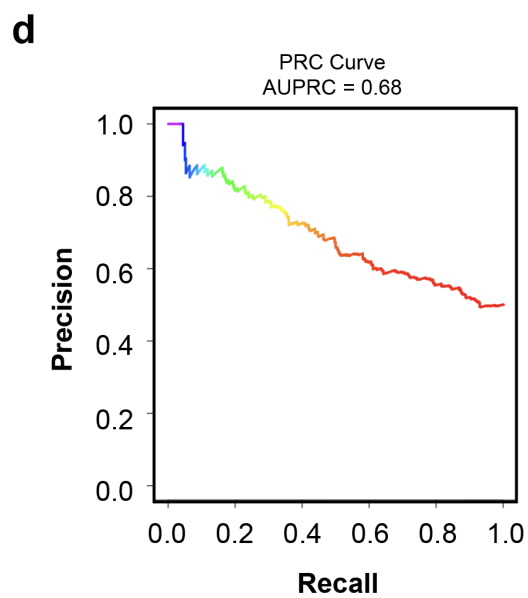

1510

1511

1512

1513

1514

1515



1516 **Figure S6. SnapATAC predicts gene and enhancer pairing by integrating**  
1517 **scATAC-seq and scRNA-seq. (a)** Prediction score distribution for single cell ATAC-  
1518 seq (5K PBMC 10X) by SnapATAC. When predicting the cell type for scATAC-seq using  
1519 corresponding scRNA-seq dataset (10X PBMC scRNA-seq), each cell in scATAC-seq was  
1520 assigned with a prediction score indicating the confidence of the prediction. It ranges  
1521 from 0 to 1, a higher score indicates a higher confidence. Using 0.5 as cutoff as suggested  
1522 in Seurat, over 98% of cells in scATAC-seq are confidently assigned to a cell type defined  
1523 in scRNA-seq. **(b)** Distance decay curve for the association (-logPvalue) between  
1524 regulatory elements and the TSS of their putative target genes. **(c-d)** AUROC and AUPRC  
1525 between cis-eQTL pairs and negative control sets. See **Supplementary Methods** for  
1526 how the control sets selected.

1527

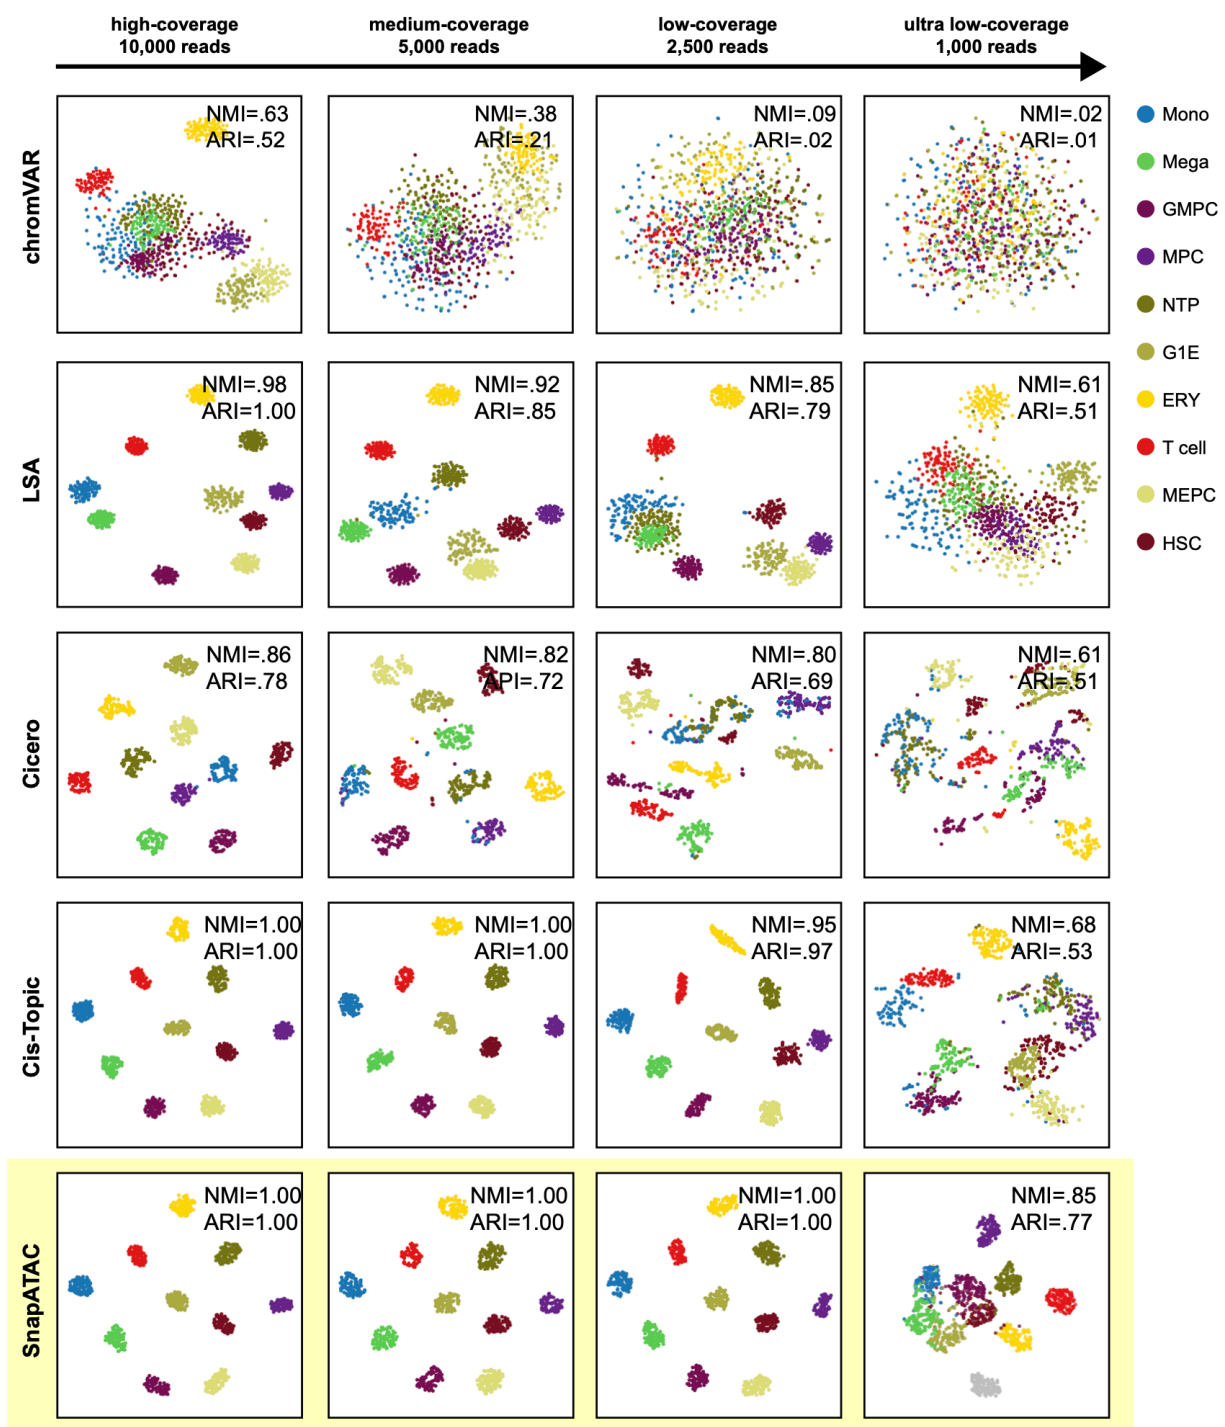

1528

1529

1530

1531

1532 **Figure S7. Evaluation of clustering accuracy of SnapATAC relative to**  
1533 **alternative methods on simulated datasets.** T-SNE visualization of clustering  
1534 results on 1,000 simulated cells sampled from 10 bulk ATAC-seq datasets (see  
1535 **Supplementary Methods** for the simulation) analyzed by five different methods –  
1536 chromVAR<sup>14</sup>, LSA<sup>8</sup>, Cicero<sup>17</sup>, Cis-Topic<sup>15</sup> and SnapATAC. Clustering results are compared  
1537 to the original cell type label and the accuracy is estimated using Normalized Mutual  
1538 Index (nmi). Mono: monocyte; Mega: megakaryocyte; GMPC: granulocyte monocyte  
1539 progenitor cell; MPC: megakaryocyte progenitor cell; NPT: neutrophil; G1E: G1E; T cell:  
1540 regulatory T cell; MEPC: megakaryocyte-erythroid progenitor cell; HSC: hematopoietic  
1541 stem cell.  
1542

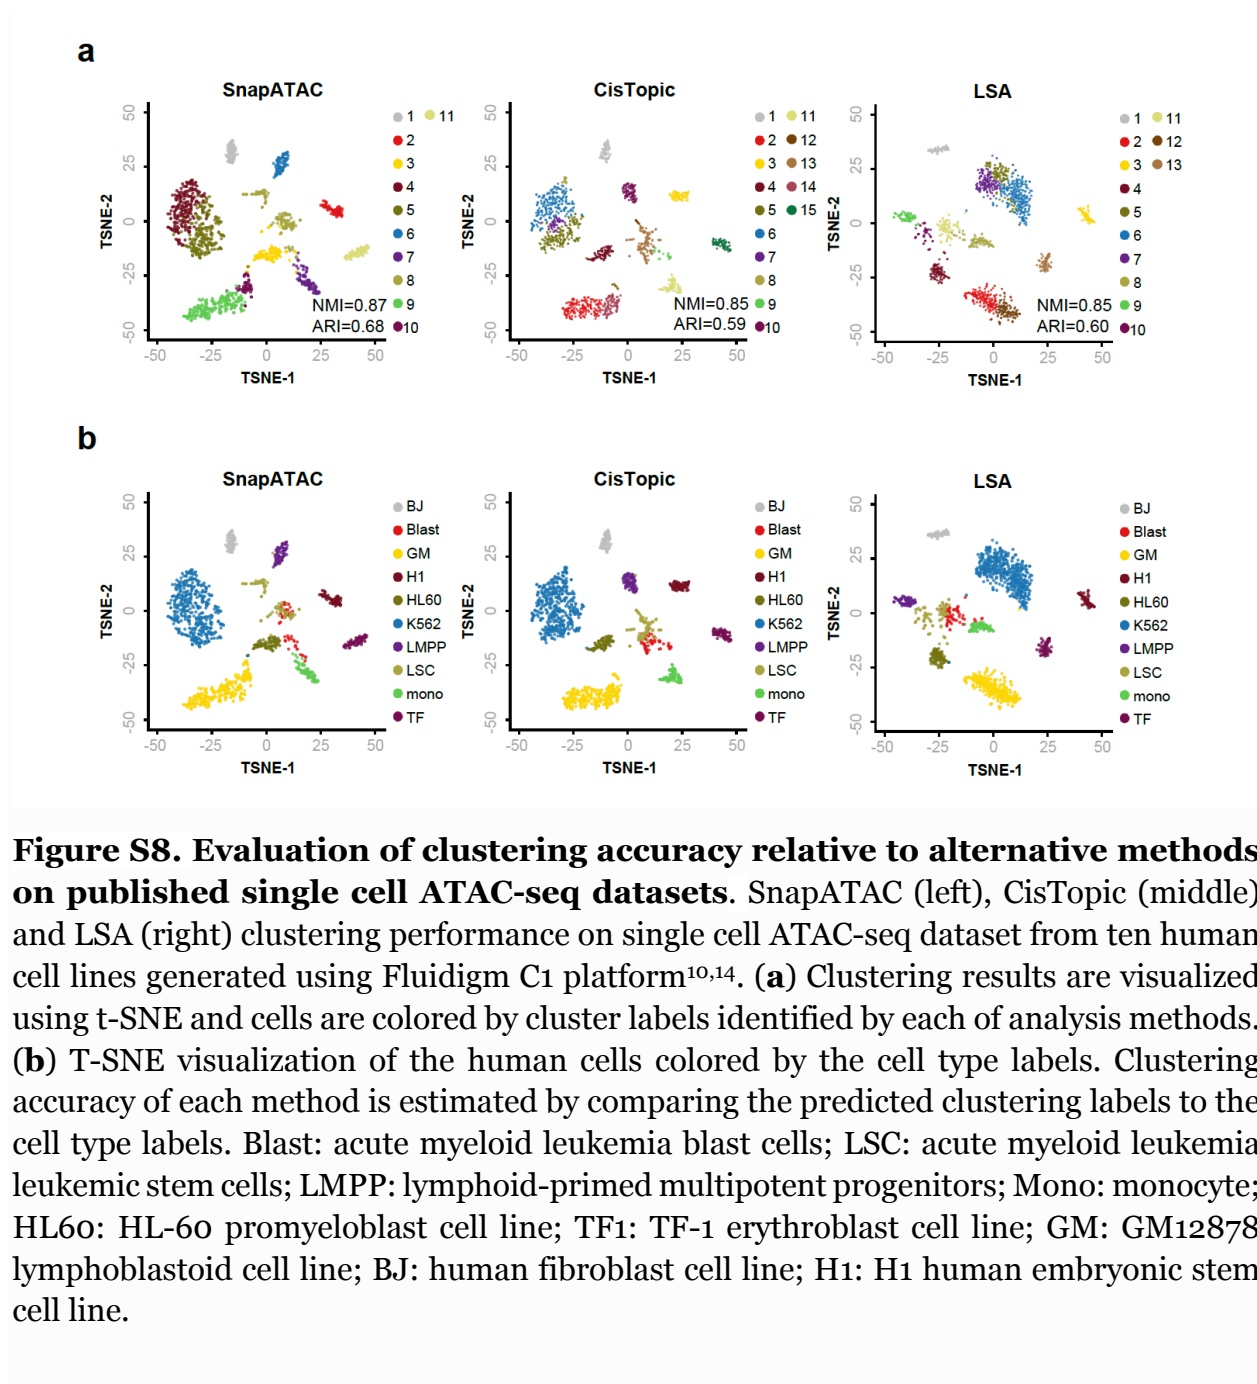

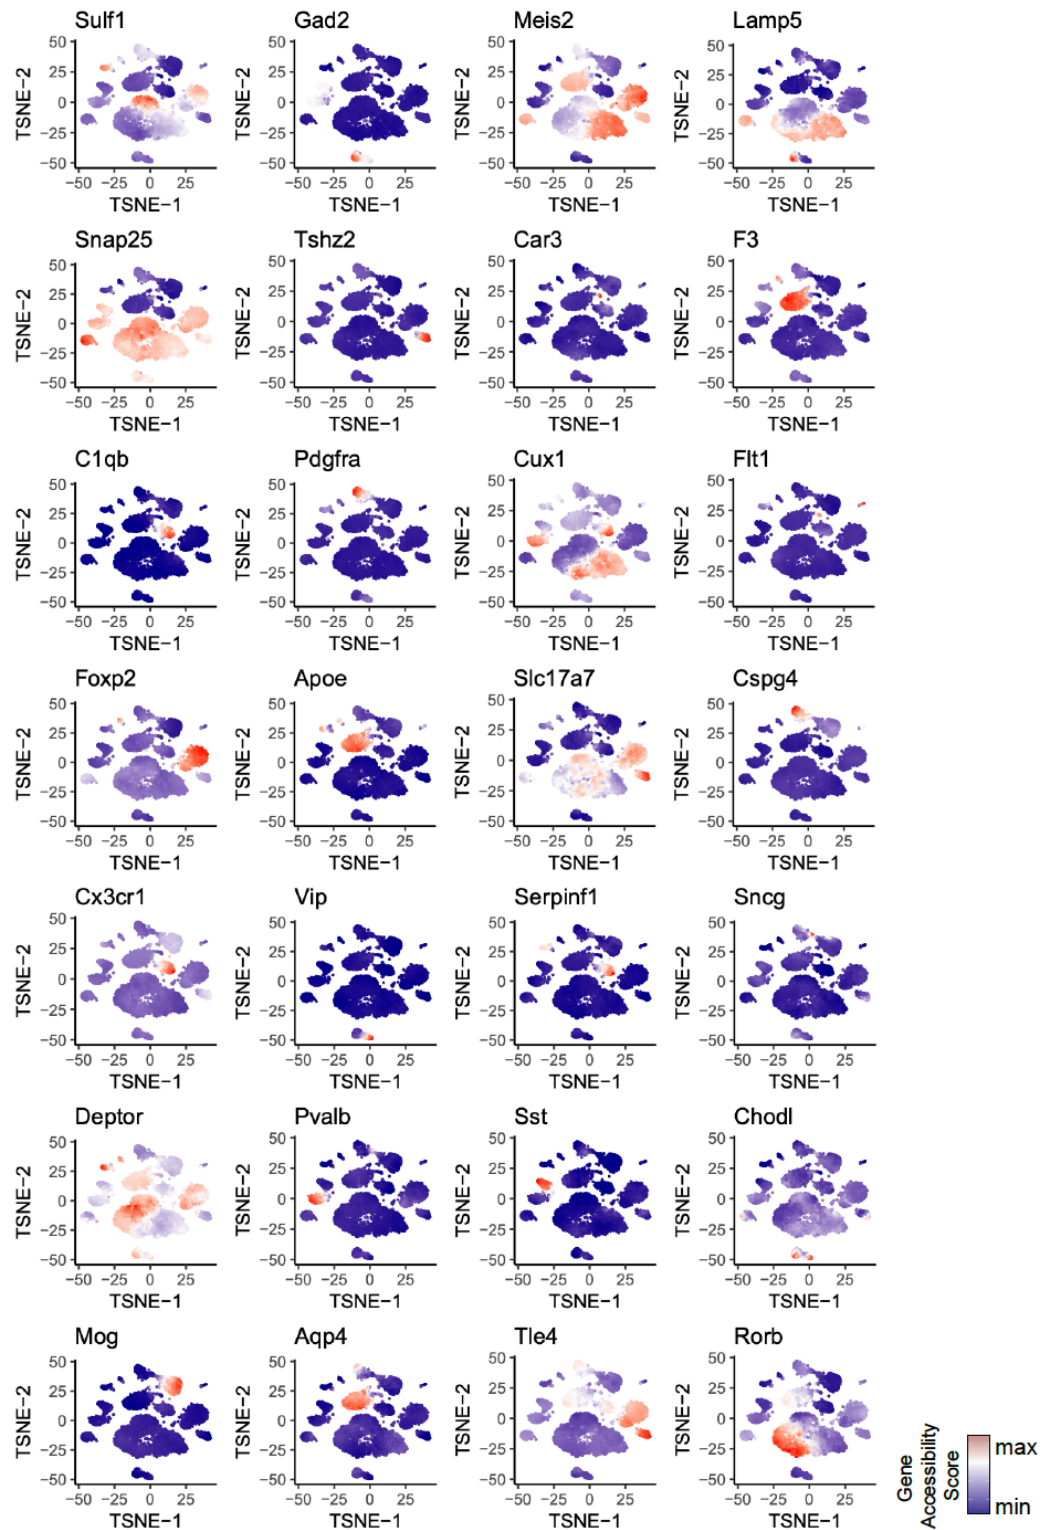

1559 **Figure S9. Gene accessibility score of canonical marker genes projected onto**  
1560 **t-SNE embedding for snATAC-seq dataset from mouse secondary motor**  
1561 **cortex.** T-SNE is generated using SnapATAC; cell type specific marker genes were  
1562 defined from previous single cell transcriptomic analysis in the adult mouse brain<sup>38</sup>; gene  
1563 accessibility score is calculated using SnapATAC (**Supplementary Methods**). Data  
1564 source is listed in **Supplementary Table S1**.

1565

1566

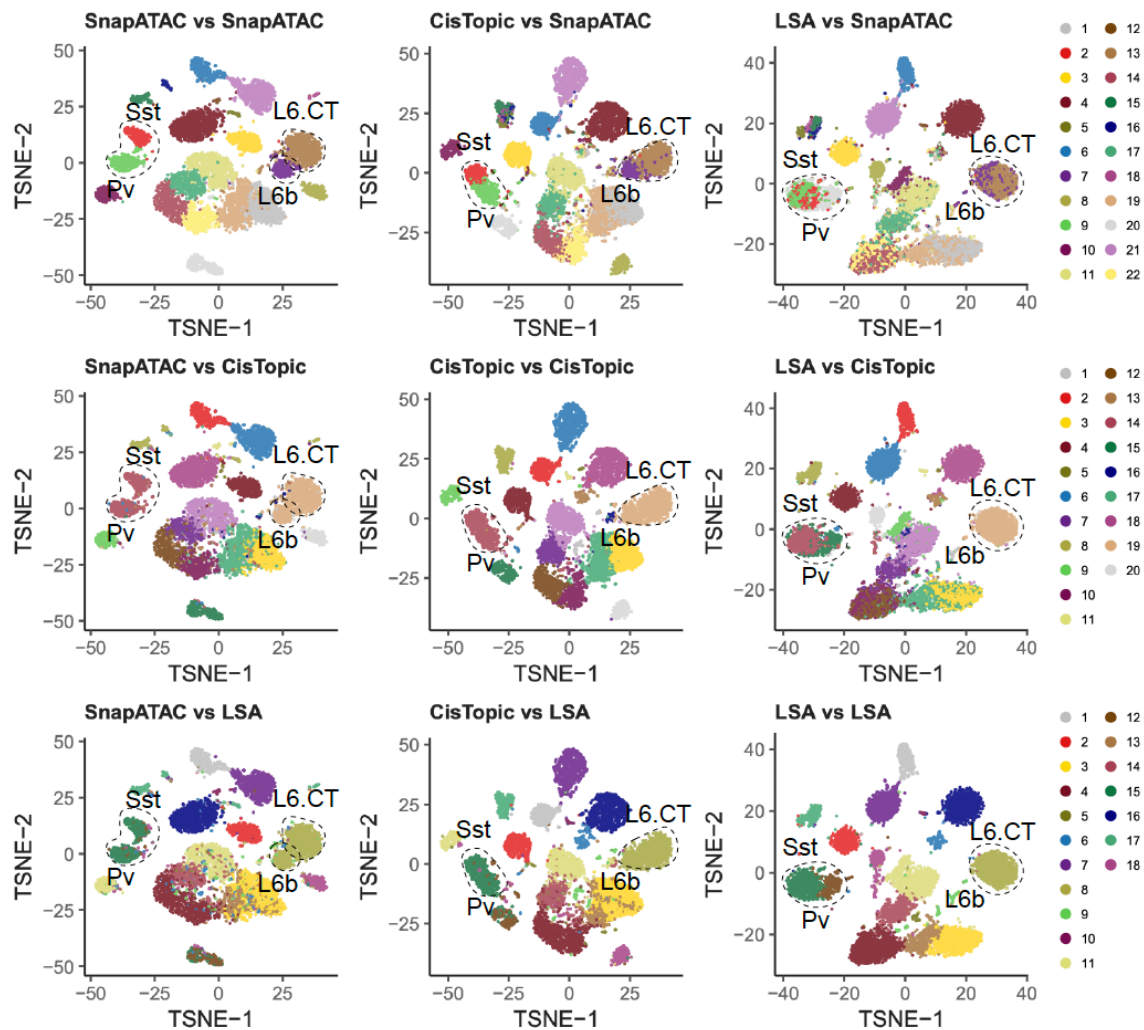

1567

1568

1569

1570

1571

1572

1573

1574

1575

1576

1577

**Figure S10. Evaluation of clustering sensitivity of SnapATAC relative to alternative methods on mouse secondary motor cortex snATAC-seq.** Three methods (cisTopic, LSA and SnapATAC) were used to analyze a dataset that contained ~10k single nucleus ATAC-seq profiles from the mouse secondary motor cortex. Pairwise comparison of the clustering results is shown by projecting the cluster label identified using one method onto the t-SNE visualization generated by another method (cluster vs. visualization). Black dash line circles highlight the rare pollutions (Sst, Pv, L6b and L6.CT) that were only identified by SnapATAC. Data source is listed in **Supplementary Table S1**.

1578  
1579  
1580

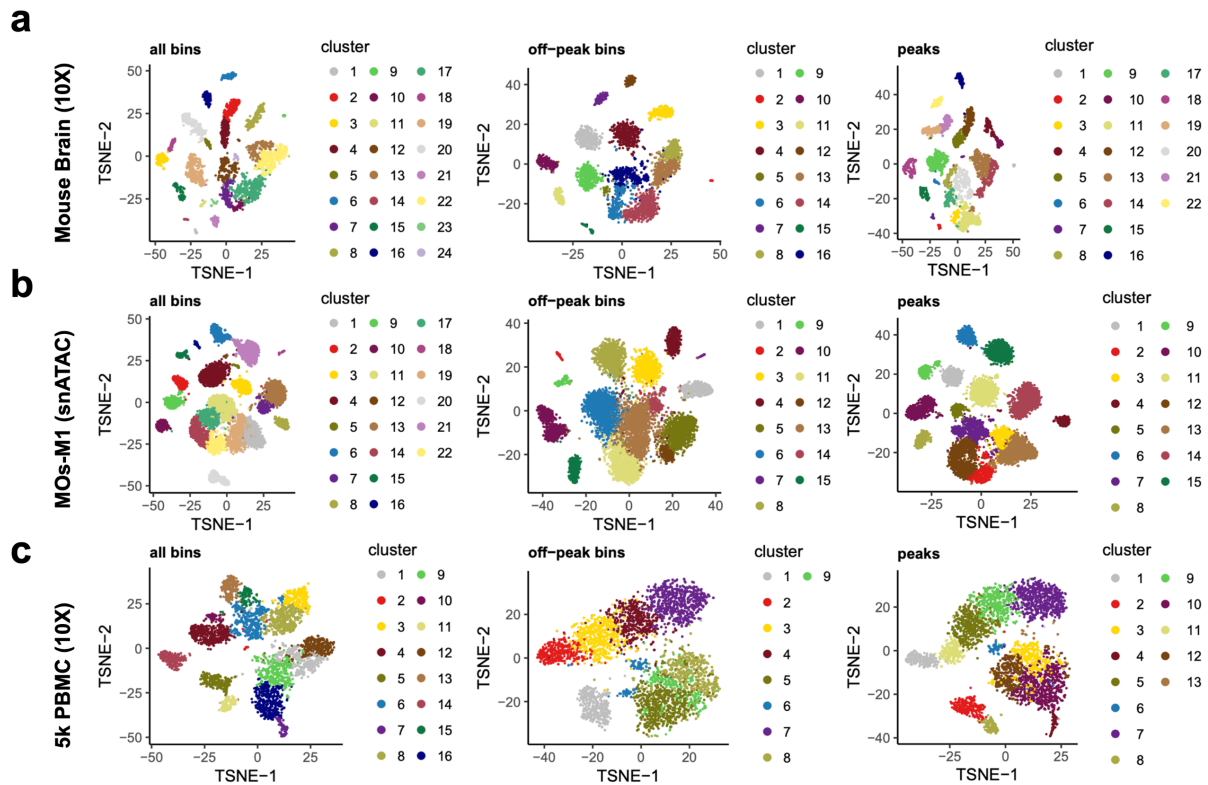

1581  
1582 **Figure S11. Off-peak reads distinguish major cell types in heterogenous**  
1583 **samples. (a-c)** SnapATAC clustering result on three benchmarking datasets using all  
1584 bins versus clustering result only using bins that are not overlapped with peaks. Data  
1585 source is listed in **Supplementary Table S1**.

1586  
1587



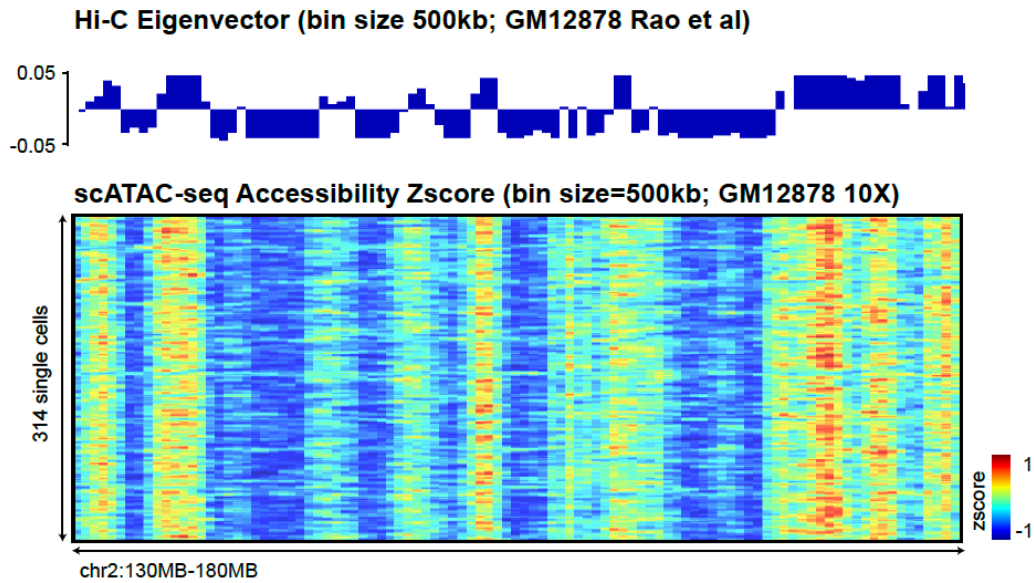

1588

1589

1590 **Figure S12. Off-peak reads reflect higher-order chromatin structure.** At 500kb  
1591 bin resolution, profile of compartments identified using Hi-C<sup>58</sup> in GM12878 overlaid the  
1592 density of “off-peak” reads for 314 cells from GM12878 10X scATAC-seq library. Data  
1593 source is listed in **Supplementary Table S1**.

1594

1595

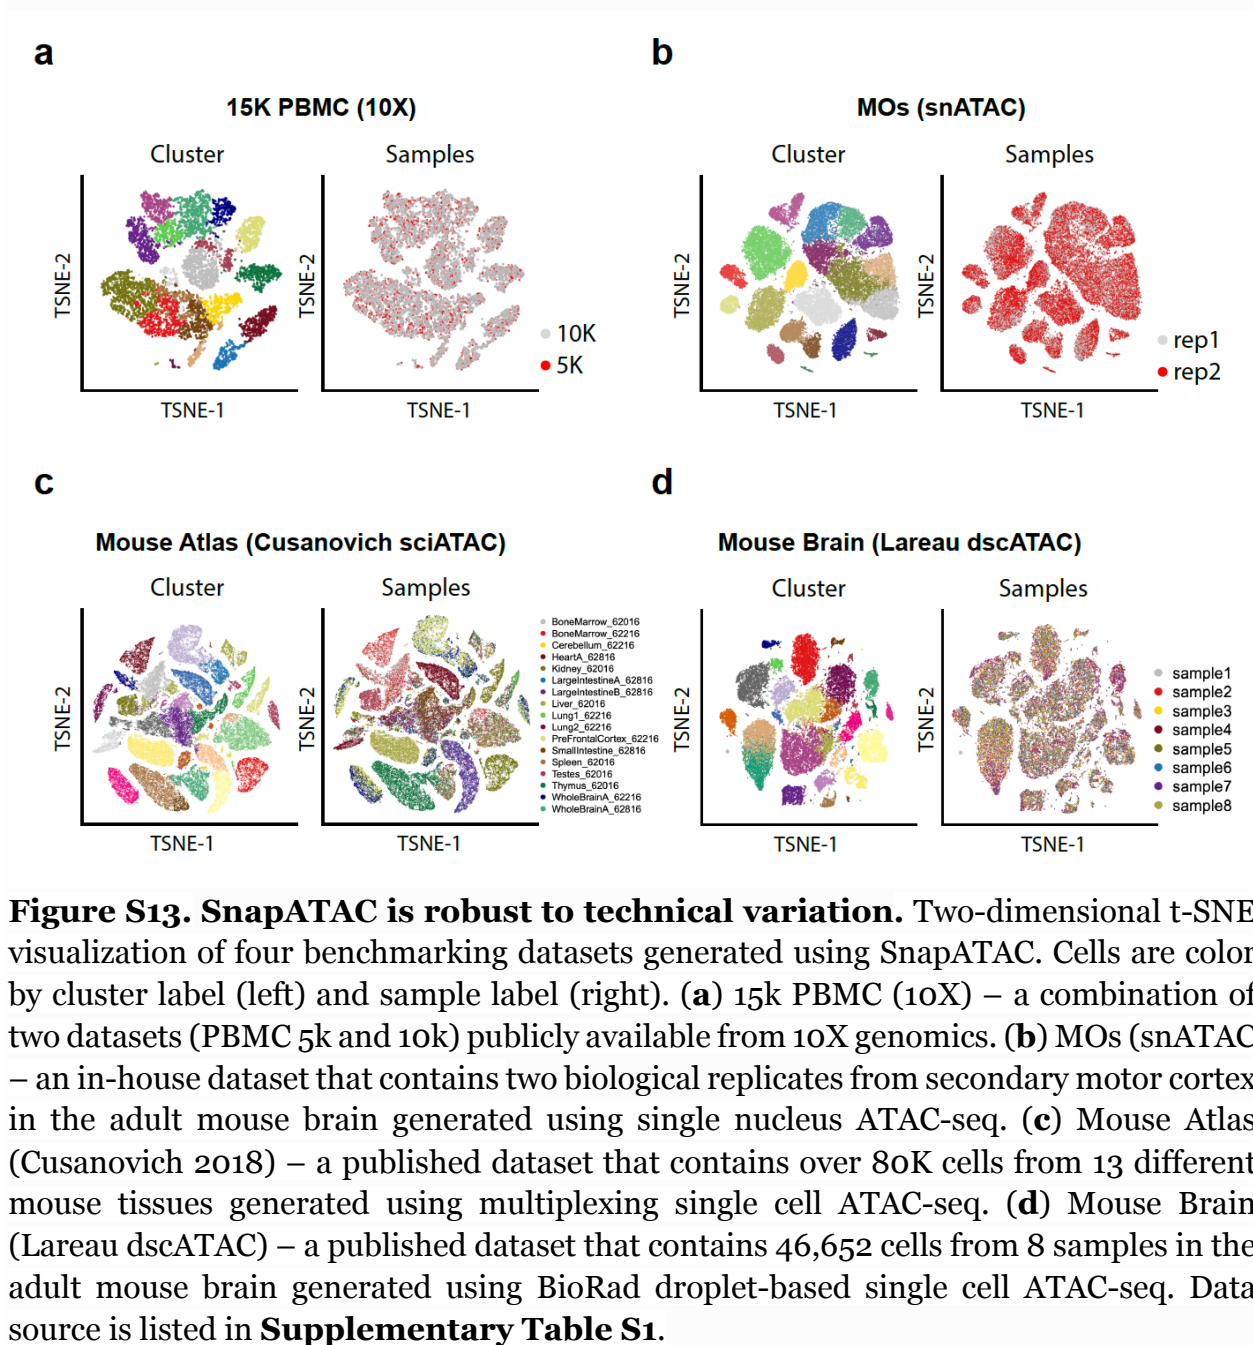

1596

1597

1598

1599

1600

1601

1602

1603

1604

1605

1606

1607

1608

**Figure S13. SnapATAC is robust to technical variation.** Two-dimensional t-SNE visualization of four benchmarking datasets generated using SnapATAC. Cells are color by cluster label (left) and sample label (right). **(a)** 15k PBMC (10X) – a combination of two datasets (PBMC 5k and 10k) publicly available from 10X genomics. **(b)** MOs (snATAC) – an in-house dataset that contains two biological replicates from secondary motor cortex in the adult mouse brain generated using single nucleus ATAC-seq. **(c)** Mouse Atlas (Cusanovich 2018) – a published dataset that contains over 80K cells from 13 different mouse tissues generated using multiplexing single cell ATAC-seq. **(d)** Mouse Brain (Lareau dscATAC) – a published dataset that contains 46,652 cells from 8 samples in the adult mouse brain generated using BioRad droplet-based single cell ATAC-seq. Data source is listed in **Supplementary Table S1**.

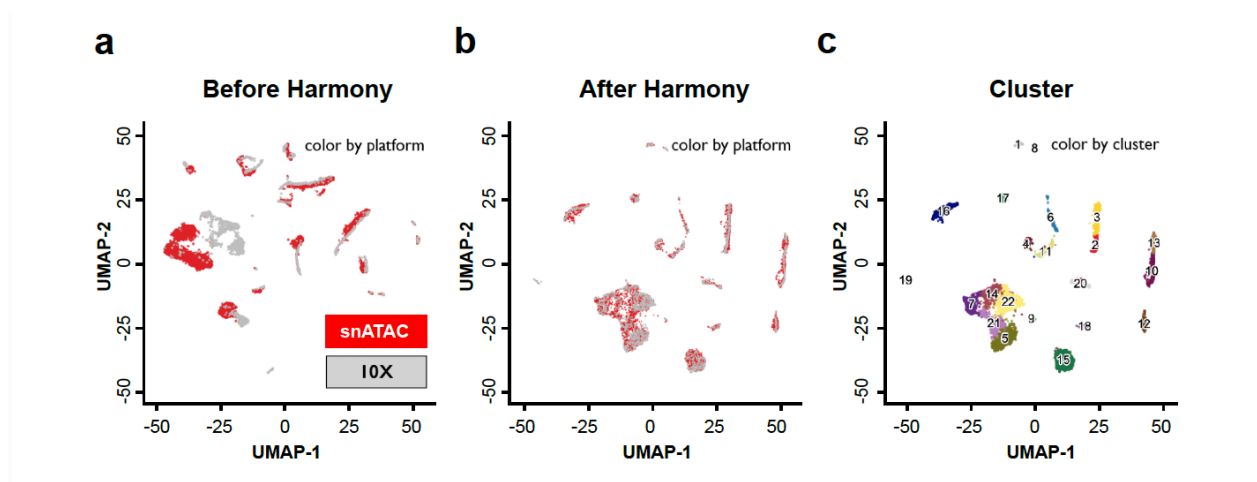

1609

1610 **Figure S14. SnapATAC eliminates batch effect using Harmony<sup>23</sup>.** The joint  
1611 UMAP visualization of two datasets of mouse brain generated using combinatorial  
1612 indexing single nucleus ATAC-seq (MOs-M1 snATAC) and droplet-based platform  
1613 (Mouse Brain 10X) before (a) and after (b) performing batch effect correction using  
1614 Harmony. Data source is listed in **Supplementary Table S1**.

1615

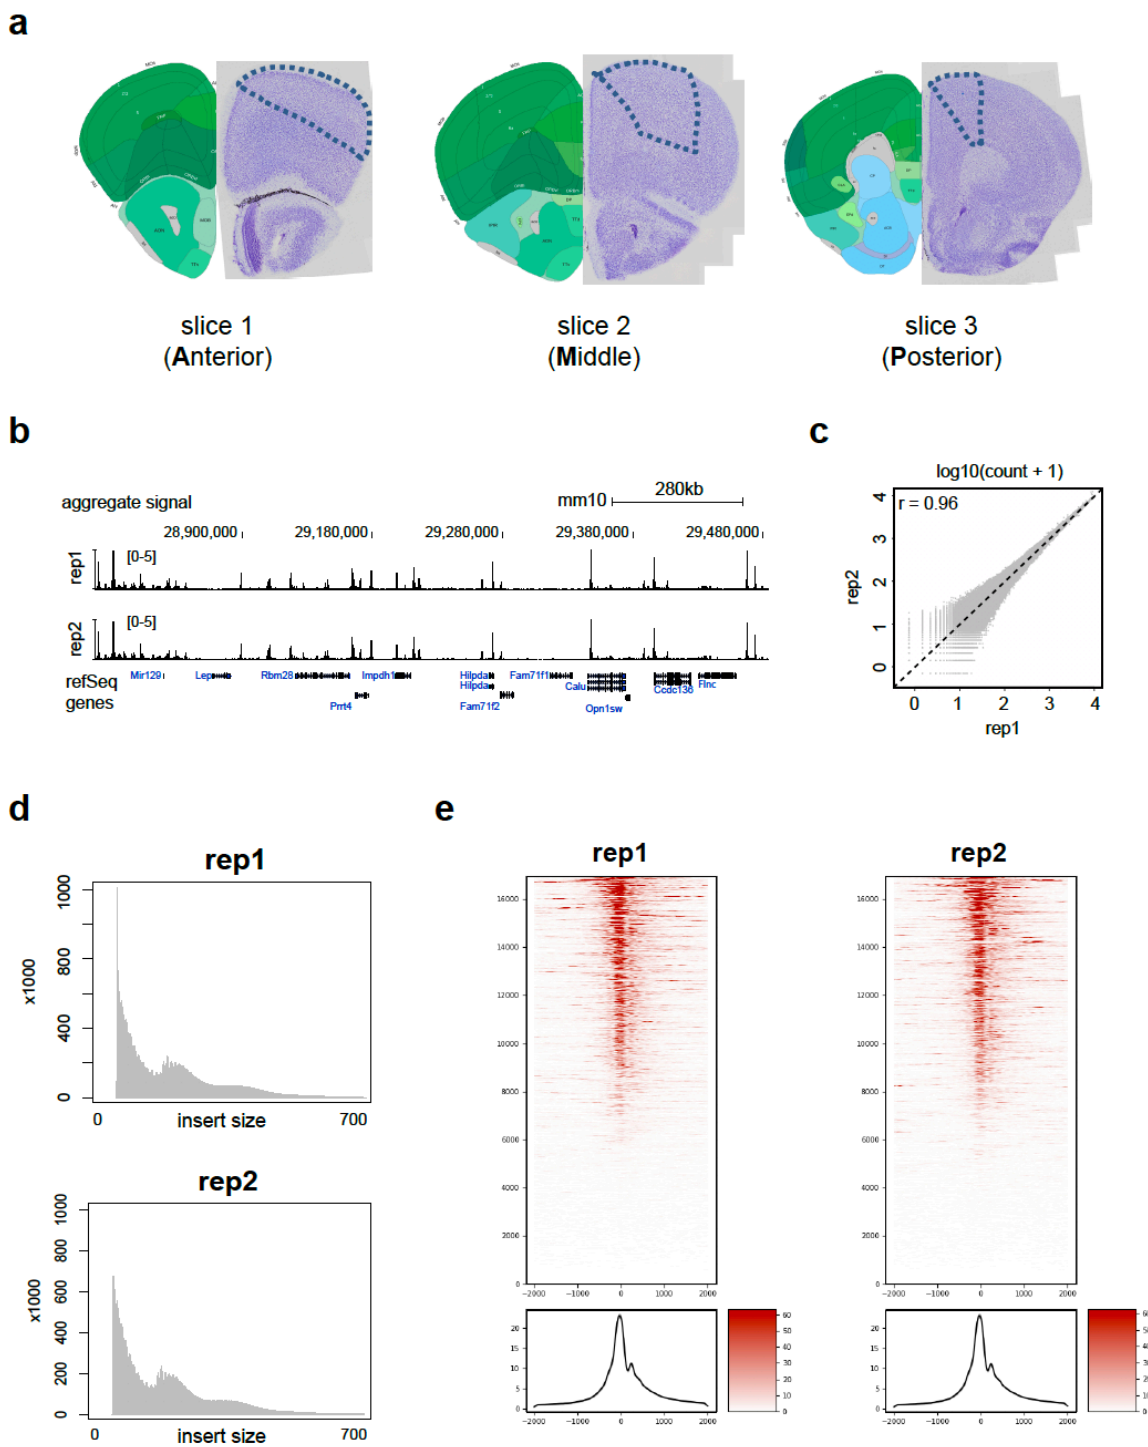

1616  
1617  
1618  
1619  
1620  
1621

1622 **Figure S15. Single nucleus ATAC-seq datasets are reproducible between**  
1623 **biological replicates. (a)** Illustration of dissection. Posterior view of three 0.6 mm  
1624 coronal slices from which the secondary motor cortex (MOs) was dissected. The right side  
1625 on each image depicts the corresponding view from the Allen Brain Atlas. The left side  
1626 correspond to the Nissl staining of the posterior side of each slice. The MOs region was  
1627 manually dissected according to the dashed lines on each slice and following the MOs as  
1628 depicted in plates 27, 33, and 39 of the Allen Brain Atlas (left side images in figure). Each  
1629 slice contains two biological replicates named as A1, A2, M1, M2, P1 and P2 (A: Anterior;  
1630 M: Middle; P: Posterior). In this study, A1, M1 and P1 is combined as replicate 1 and A2,  
1631 M2 and P2 are combined as replicate 2. **(b)** Genome-browser view of aggregate signal for  
1632 two biological replicates. **(c)** Pearson correlation of count per million (CPM) at peaks  
1633 between two replicates. **(d)** Insert size distribution and **(e)** TSS enrichment score for two  
1634 biological replicates.  
1635

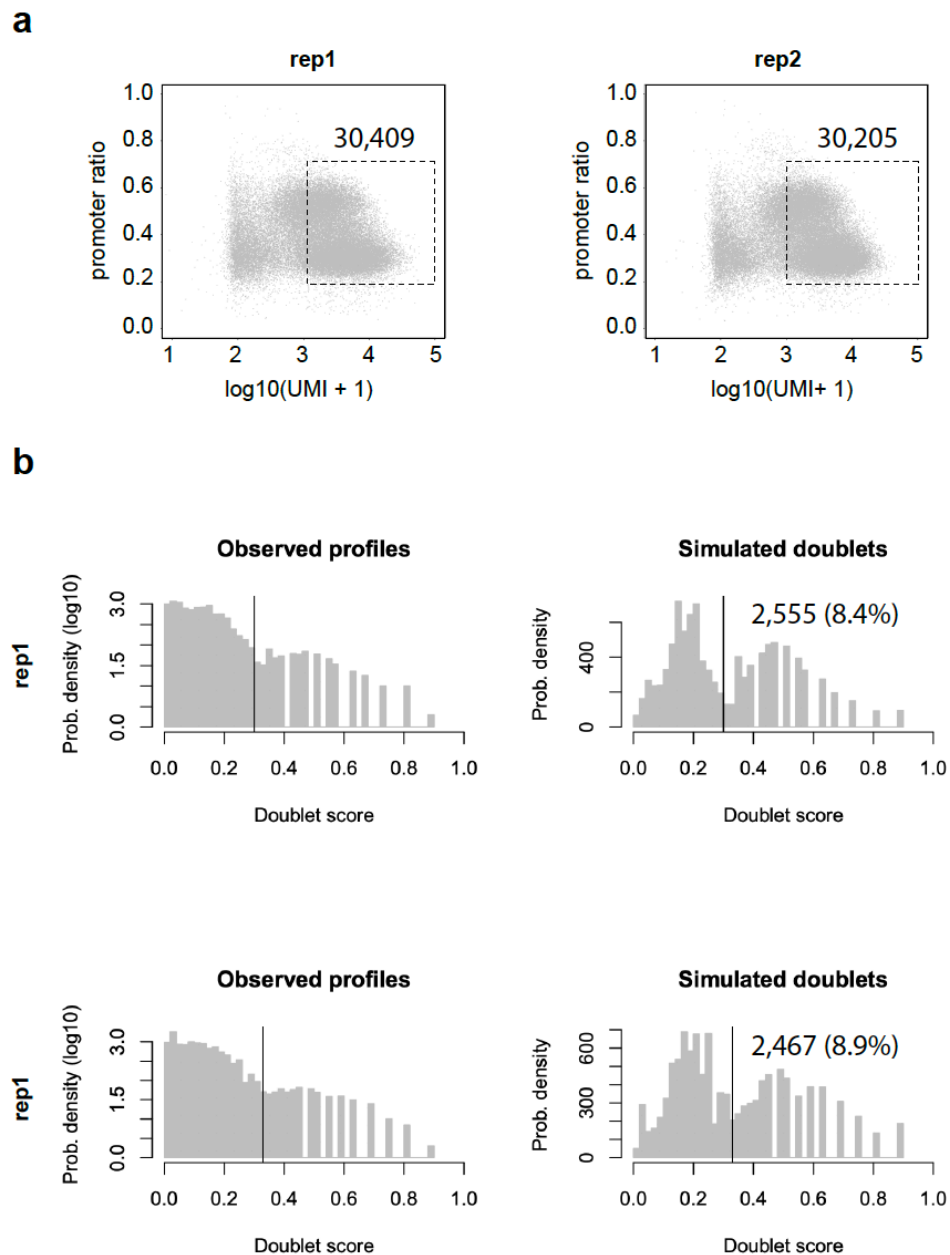

1636  
1637

1638 **Figure S16. Barcode selection of MOs.** (a) Cells of unique fragments within the  
1639 range of 1,000-100,000 and fragments in promoter ratio within the range of 0.2-0.7 were  
1640 selected. This resulted in 30,409 and 30,205 nuclei for two replicates. (b) **With 5kb cell-**  
1641 **by-bin matrix as input matrix, putative doublets were identified using Scrublet**<sup>37</sup>, which  
1642 predicted 2,555 (8.4%) and 2,467 (8.9%) nuclei to be doublets for each replicate. The  
1643 predicted doublet ratio is similar to the theoretical calculation of doublet ratio for  
1644 multiplexing single cell ATAC-seq experiment<sup>5,7</sup>.

1645

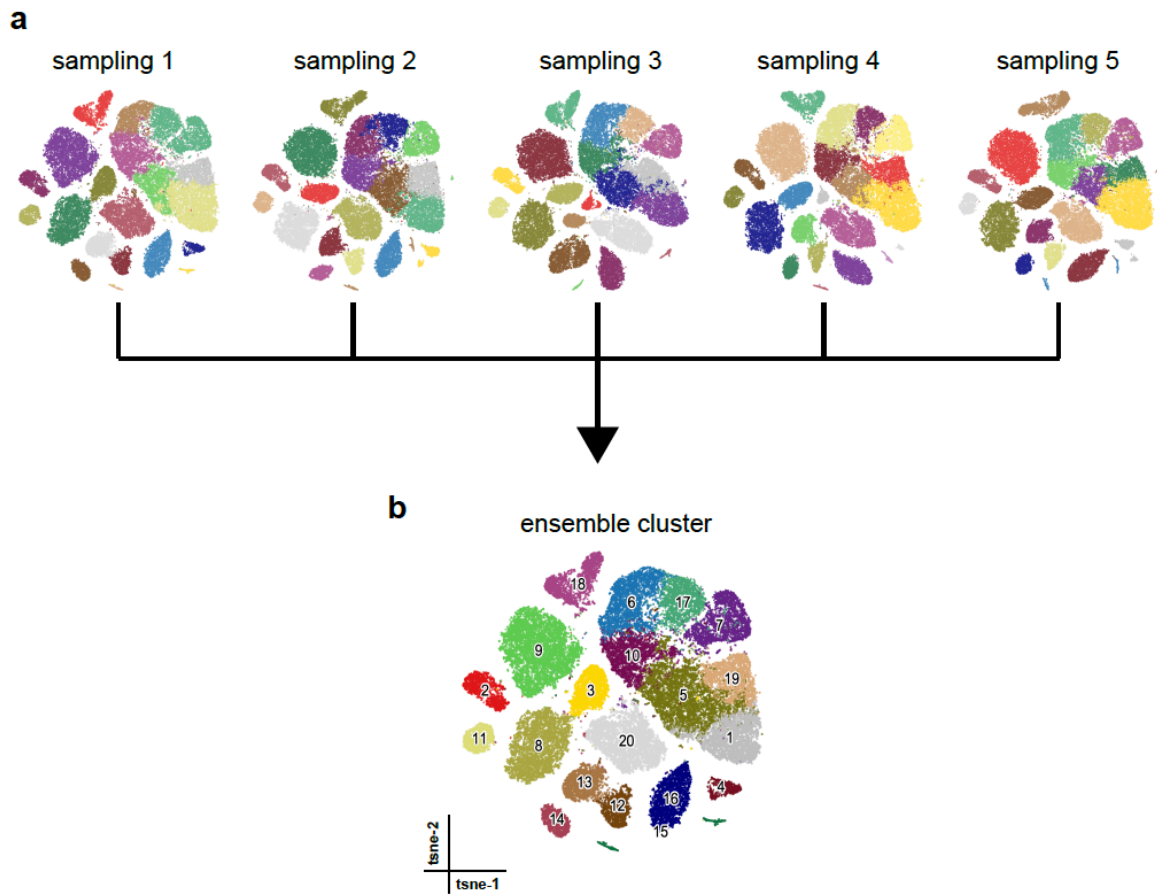

1646  
1647  
1648  
1649  
1650  
1651

**Figure S17. Consensus clustering of MOs.** (a) Five clustering results were generated using SnapATAC with different set of landmarks (10,000). (b) These five clustering solutions were combined to create a consensus clustering which identified 20 clusters in MOs (**Supplementary Methods**).

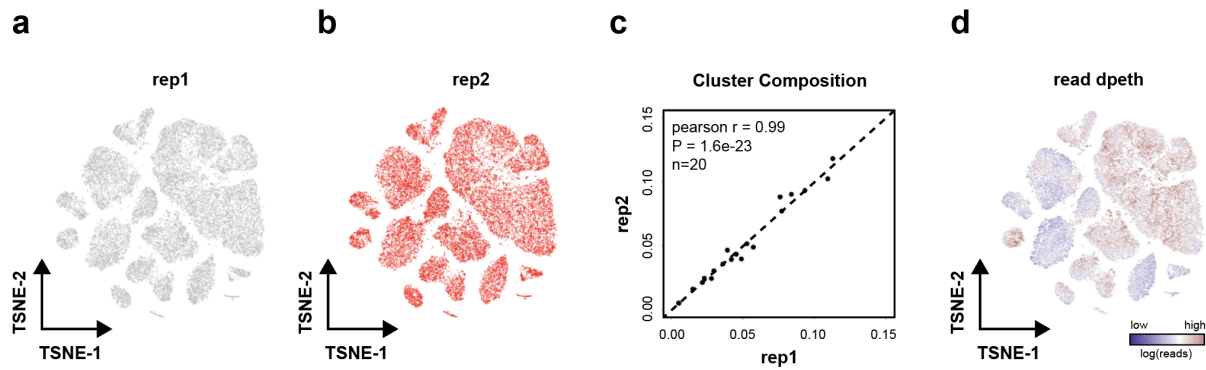

1652

1653

1654

1655

1656

1657

1658

**Figure S18. MOs clustering result is reproducible between biological replicates.** (a-b) T-SNE visualization of cells from two biological replicates. (c) The cluster composition is highly reproducible between two biological replicates ( $r=0.99$ ;  $P$ -value =  $1.6e-23$ ); (d) T-SNE visualization of cells with color scaled by sequencing depth.



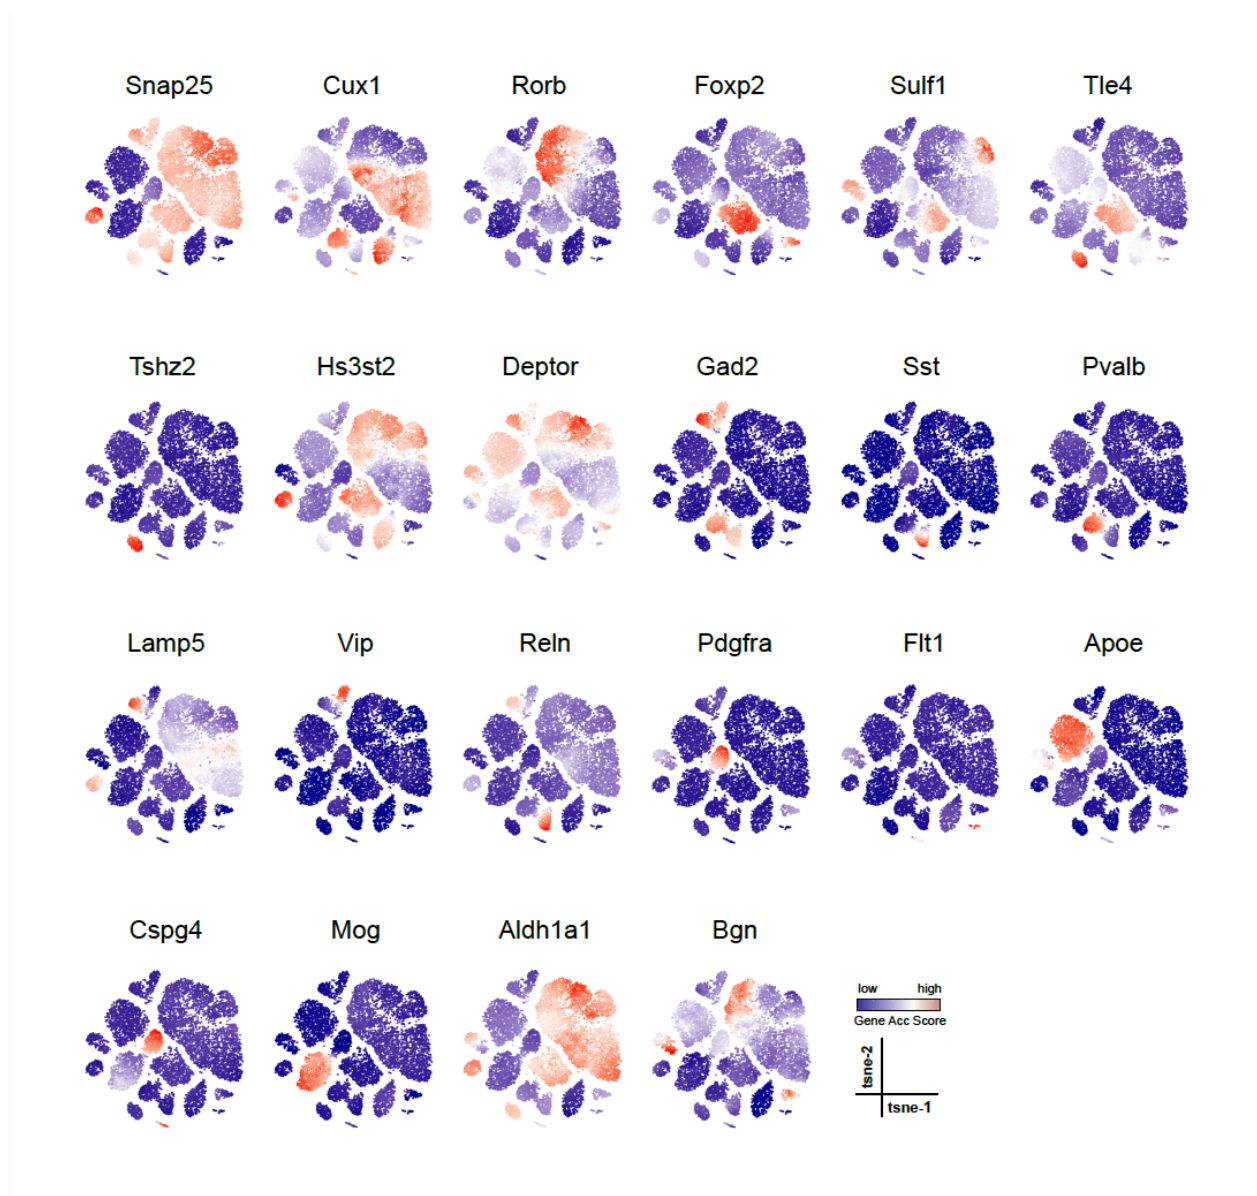

1659

1660 **Figure S19. Gene accessibility score of canonical marker genes projected**  
1661 **onto MOs t-SNE embedding to guide the cluster annotation.** T-SNE is generated  
1662 using SnapATAC for MOs; cell type specific marker genes was defined from previous  
1663 single cell transcriptomic analysis in adult mouse brain<sup>38</sup>; gene accessibility score is  
1664 calculated using SnapATAC (**Supplementary Methods**) and projected to the t-SNE  
1665 embedding.

1666

1667

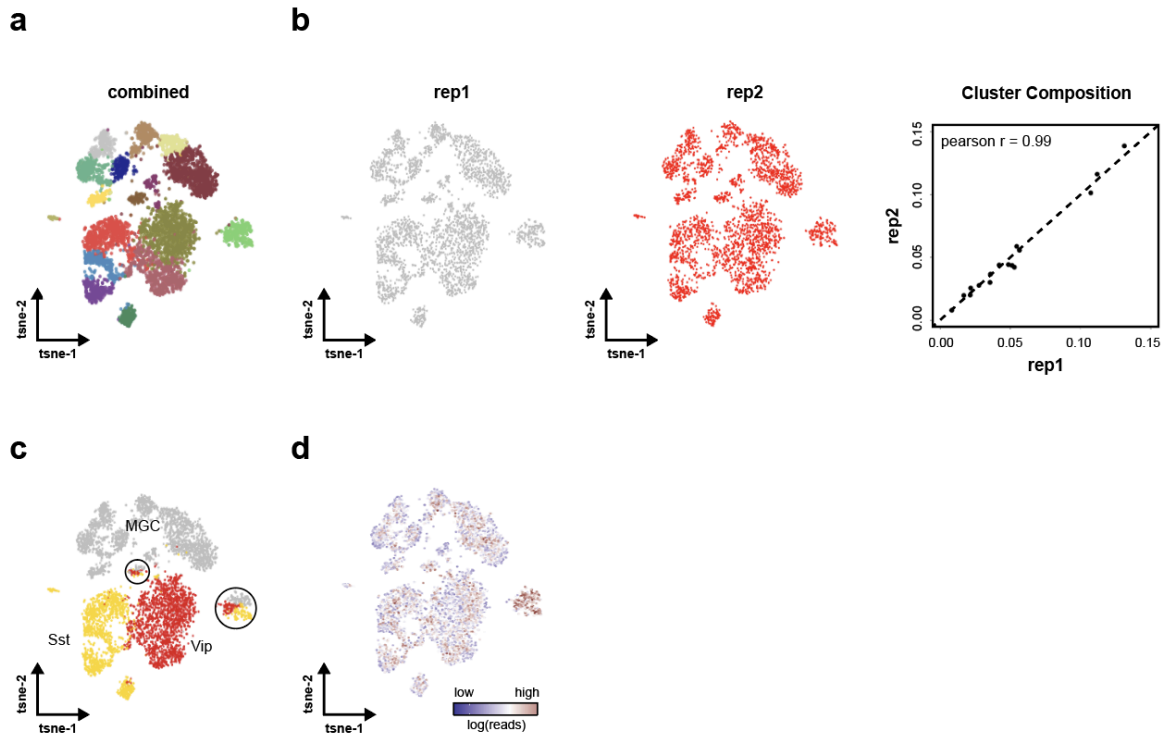

1668

1669

1670 **Figure S20. Iterative clustering identifies 17 GABAergic neuronal subtypes.**

1671 (a) Sub-clustering of 5,940 GABAergic neurons identified 17 distinct cell clusters. (b)

1672 Cluster composition was highly reproducible between two biological replicates. (c) TSNE

1673 visualization of 5,940 GABAergic neurons colored by cell types identified in the initial

1674 clustering (shown in **Fig. 5a**). Black circles mark clusters that are potential doublets, a

1675 mixture of multiple cell types. (d) TSNE plot of GABAergic neurons colored by sequencing

1676 depth.

1677

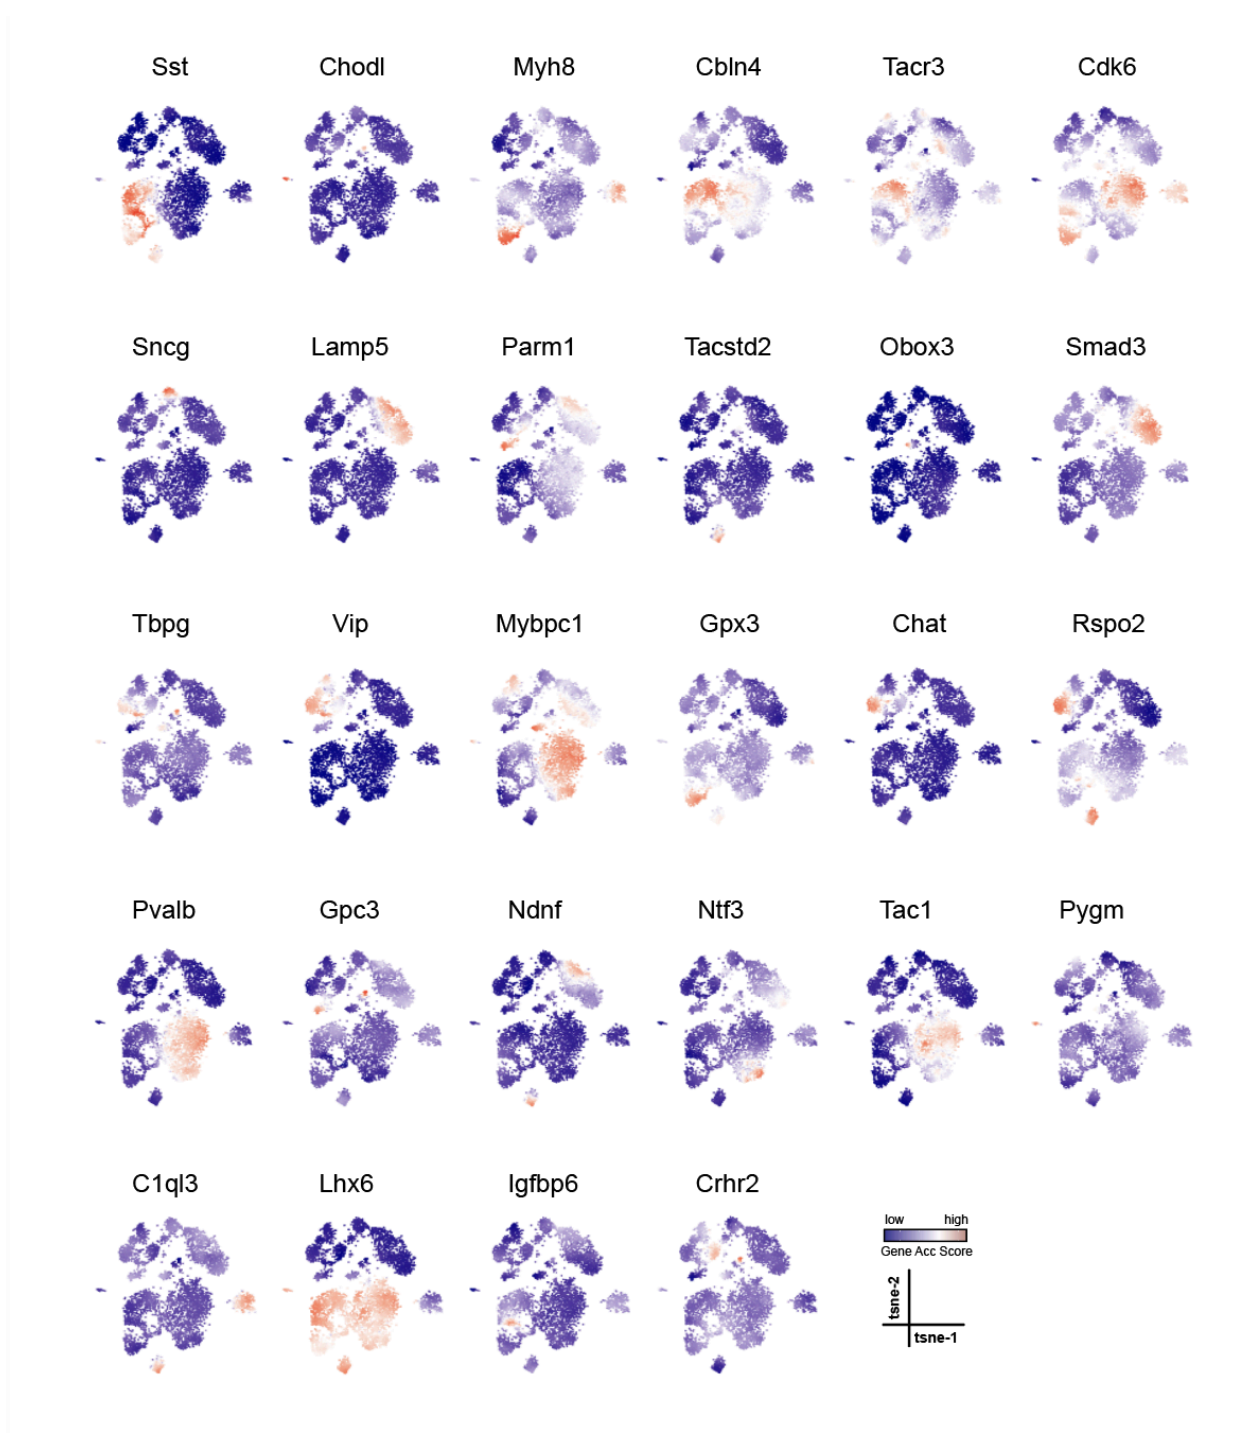

1678

1679

1680 **Figure S21. Gene accessibility score of marker genes projected onto t-SNE**  
1681 **embedding from GABAergic neurons to guide the cluster annotation.** Iterative  
1682 clustering is performed against GABAergic neurons to identify subtypes. Twenty eight cell  
1683 type specific marker genes were defined from previous single cell transcriptomic analysis  
1684 in adult mouse brain<sup>38</sup>; gene accessibility score is calculated using SnapATAC  
1685 **(Supplementary Methods).**  
1686  
1687

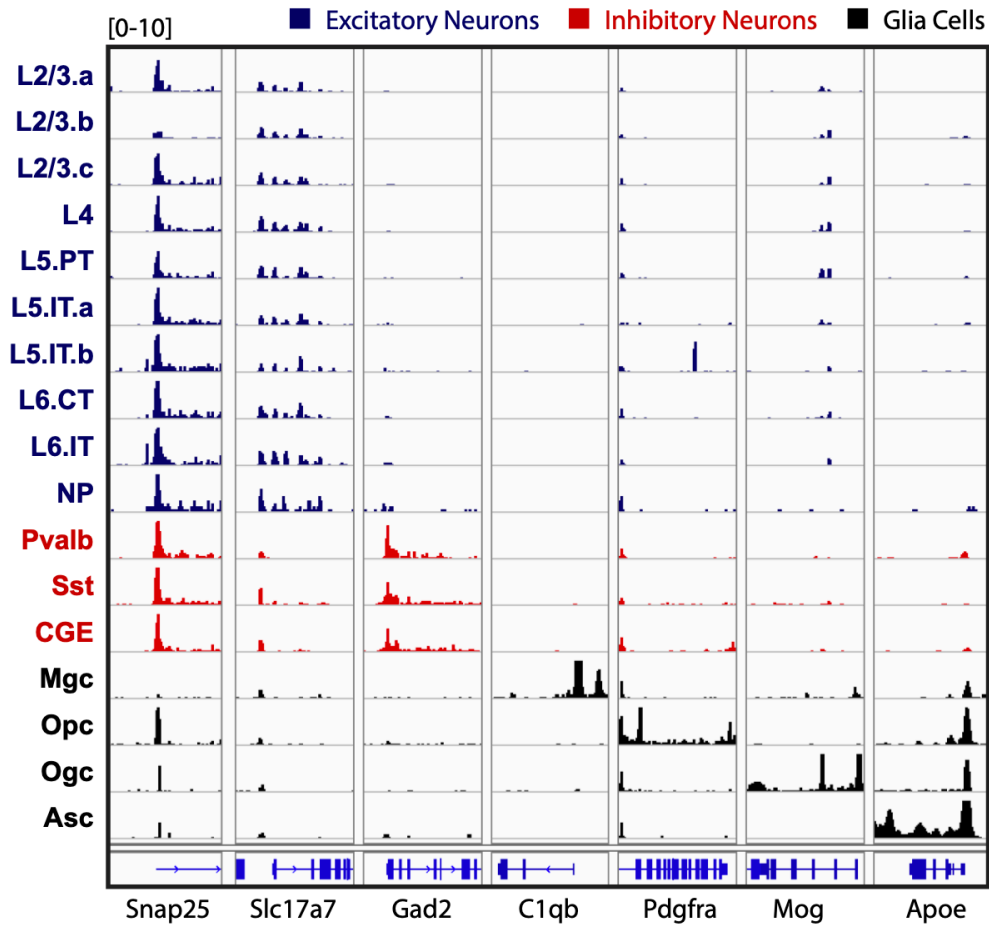

1688

1689

1690

**Figure S22. Genome browser view of aggregate signal for each of the major cell populations identified in the adult mouse brain (Fig. 5a).**

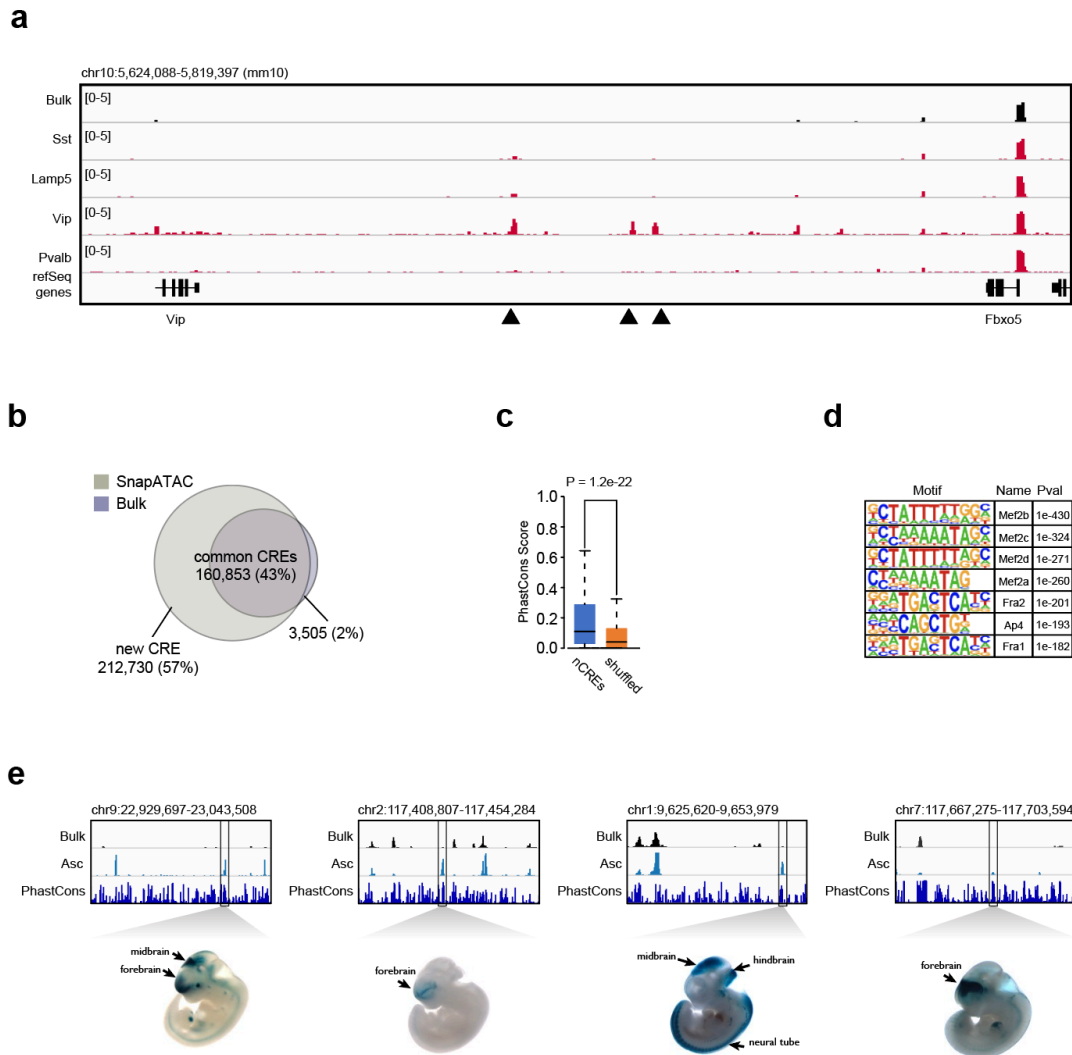

1691  
 1692 **Figure S23. SnapATAC uncovers novel candidate *cis*-regulatory elements in**  
 1693 **rare cell types. (a)** Genome browser view of 20Mb region flanking gene *Vip*. Dash line  
 1694 highlight five regulatory elements specific to *Vip* subtypes that are under-represented in  
 1695 the conventional bulk ATAC-seq signal. **(b)** Over fifty percent of the regulatory elements  
 1696 identified from 20 major cell populations are not detected from bulk ATAC-seq data. **(c)**  
 1697 Sequence conservation comparison between the new elements and randomly chosen  
 1698 genomic regions. **(d)** Top seven motifs enriched in Pv-specific new elements. **(e)**  
 1699 **Examples of four new elements that were previously tested positive in transgenic mouse**  
 1700 **assays (from VISTA database). Bulk: Bulk ATAC-seq; Asc: aggregated signal from**  
 1701 **astrocyte population (ASC) in the adult mouse brain as shown in Fig. 5a.**

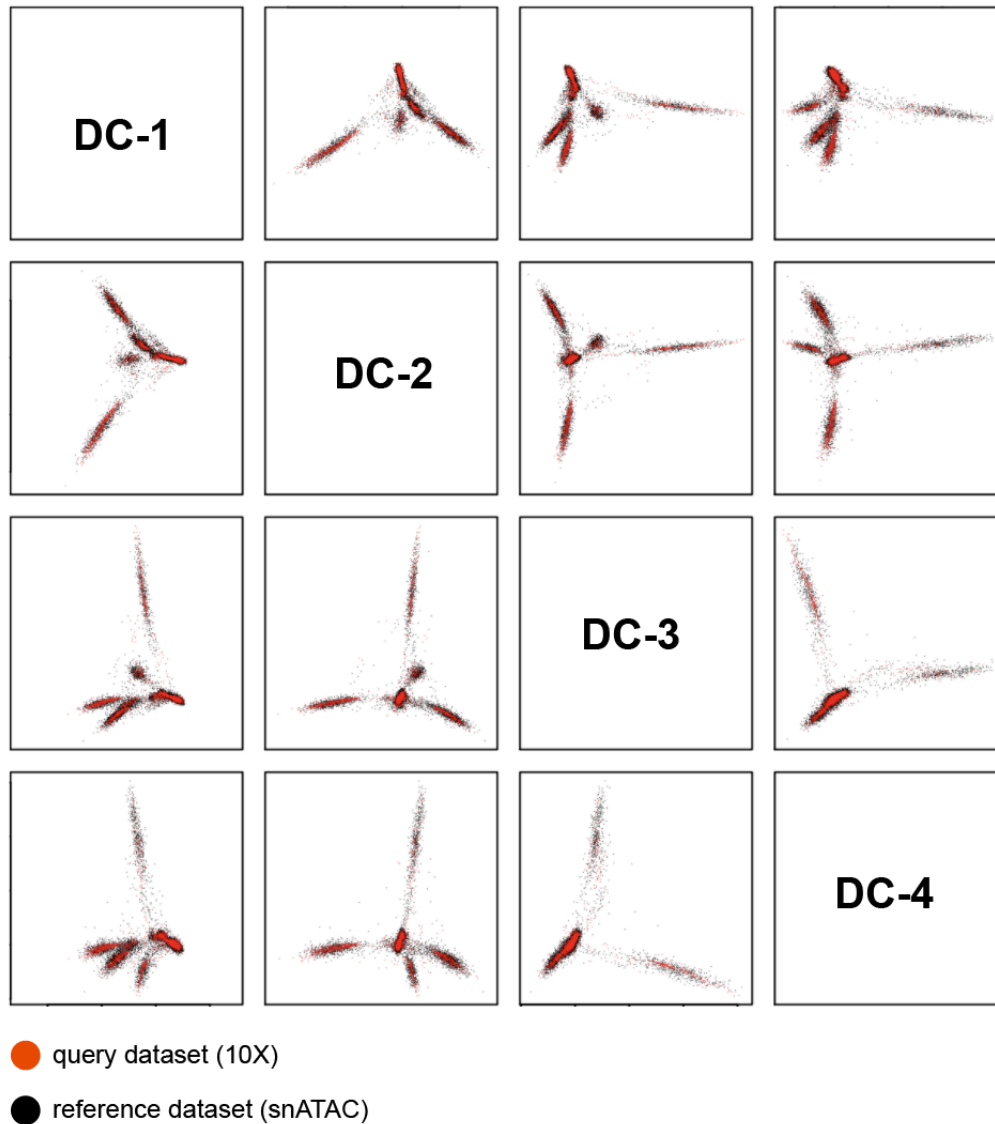

1702  
1703  
1704  
1705  
1706  
1707  
1708  
1709

**Figure S24. Joint embedding for query (Mouse Brain 10X) and reference dataset (MOs snATAC).** The query dataset (10X) is projected onto the low dimension embedding space precomputed for the reference dataset (snATAC). Batch effect is corrected using Harmony. Pairwise plot of the first four dimensions in which cells are colored by dataset - red for query cells (Mouse Brain 10X) and black for reference cells (MOs snATAC). Data source as listed in **Supplementary Table S1**.

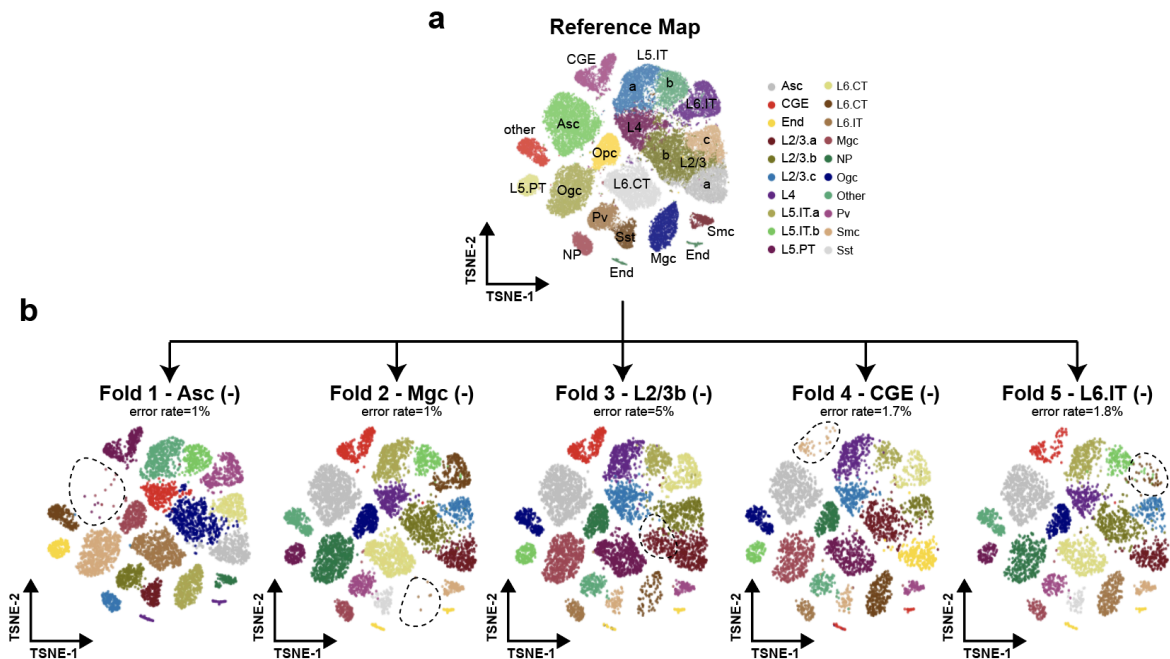

1710  
1711

1712 **Figure S25. SnapATAC is robust for supervised annotation of datasets**  
1713 **containing cell types missing in the reference atlas. (a)** Two-dimensional t-SNE  
1714 visualization of the reference dataset MOs (snATAC). **(b)** A five-fold cross validation is  
1715 performed to this reference dataset. For each fold, we introduce perturbation to the 80%  
1716 training dataset by randomly dropping one cell type (Asc, Mgc, L2/3b, CGE and L6.IT).  
1717 We then predict on the 20% test dataset using the model learned from the perturbed  
1718 training dataset. The prediction accuracy for each fold is shown in **(b)** and cell type  
1719 removed from the training dataset are highlighted by the dash-line circles.

1720  
1721  
1722



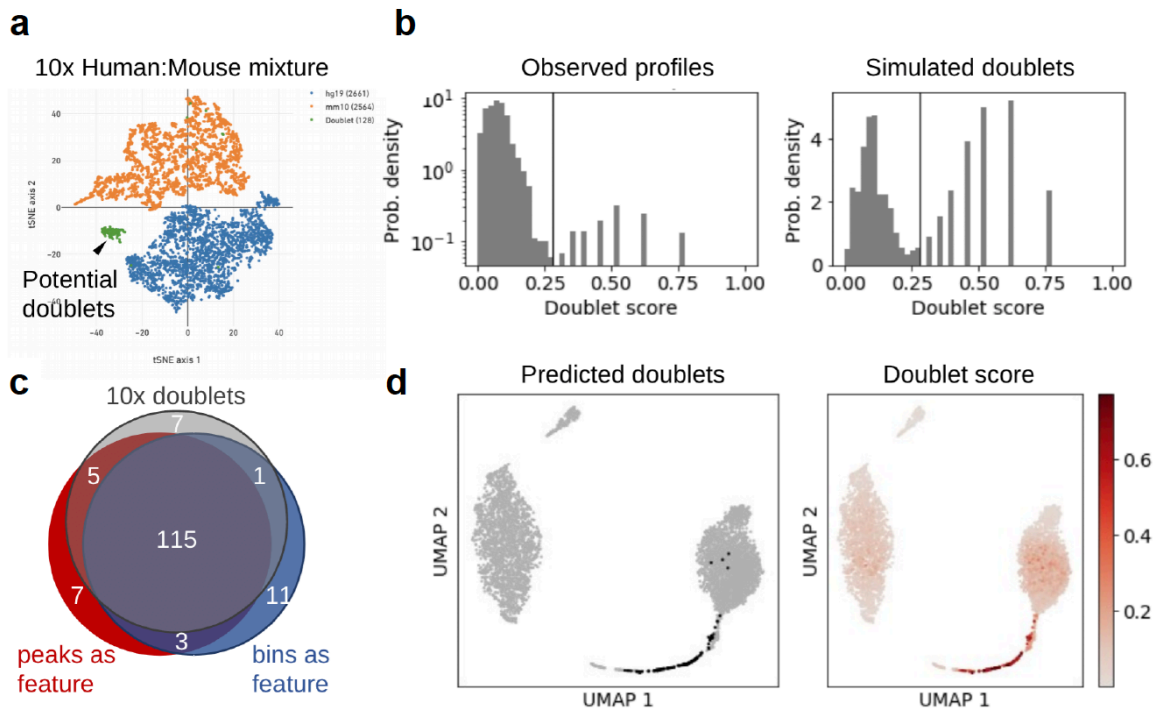

1723  
1724 **Figure S26. Doublets detection using Scrublet.** (a) T-SNE representation of a  
1725 dataset (hgmm\_1k 10X) that contained 1,000 human (GM12878) and mouse (A20) cells.  
1726 Cells are colored by species determined based on the alignment ratio between human and  
1727 mouse genome. Orange: A20; blue: GM12878; green: putative doublets. (b) Distribution  
1728 of doublet score for putative doublets and simulated doublets estimated using Scrublet<sup>37</sup>.  
1729 (c) Doublets are predicted using cell-by-peak and cell-by-bin matrix separately. Venn  
1730 diagram show the overlap between Scrublet-predicted doublets using peak or bin matrix  
1731 and doublets identified based on alignment ratio. (d) Doublets scores projected onto the  
1732 UMAP embedding.

1733  
1734  
1735
